# Supplementary material for: Phytochemical Analysis and Anti-Inflammatory Activity of Different Ethanolic Phyto-Extracts of Artemisia annua L
Source: MDPI journal article supplement (doi:10.3390/biom11070975), 2021-07-02
Supplement: s1 [file s1]

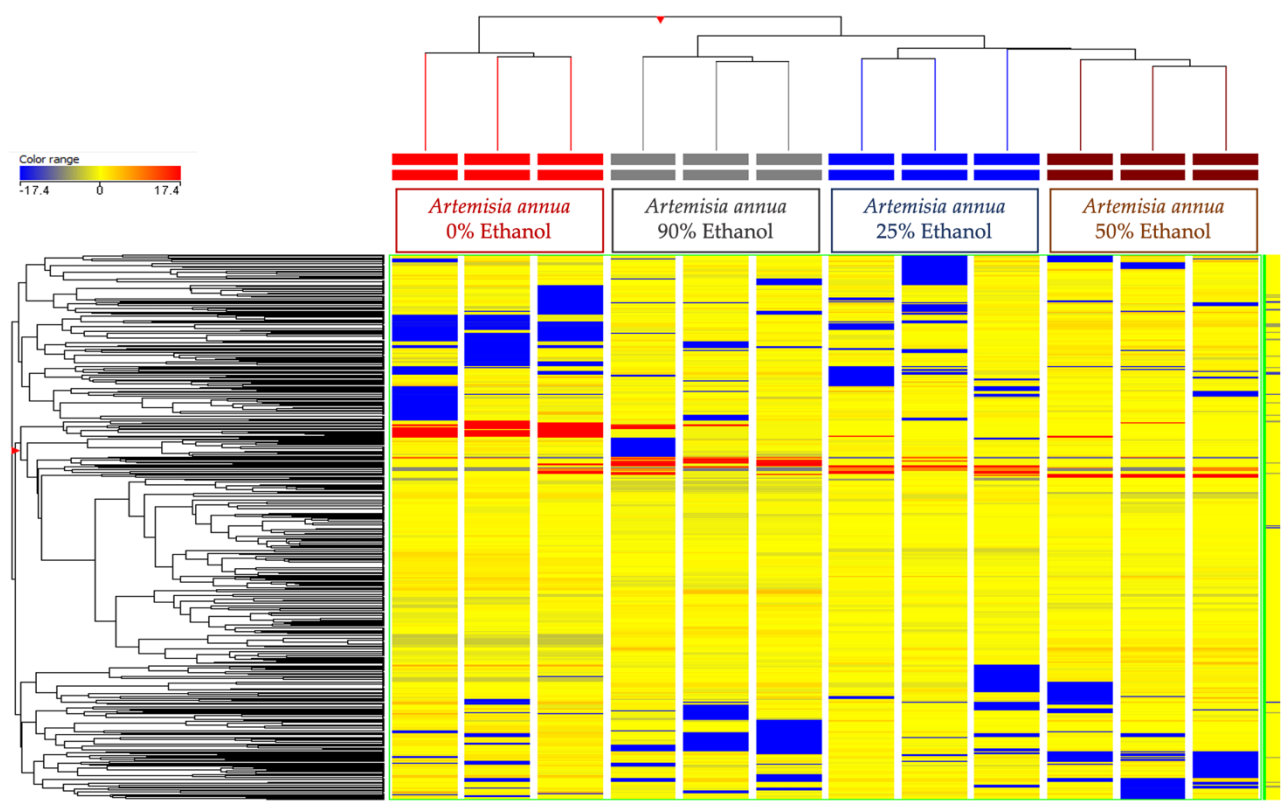

**Figure S1.** Unsupervised hierarchical cluster analysis (HCA) of bioactive compound classes, considering four hydroalcoholic phytoextracts of *Artemisia annua* (Aa) i.e., Aa ethanol 0%, Aa ethanol 25%, Aa ethanol 50%, and Aa ethanol 90%. The model was performed using foldchange values normalized by median.

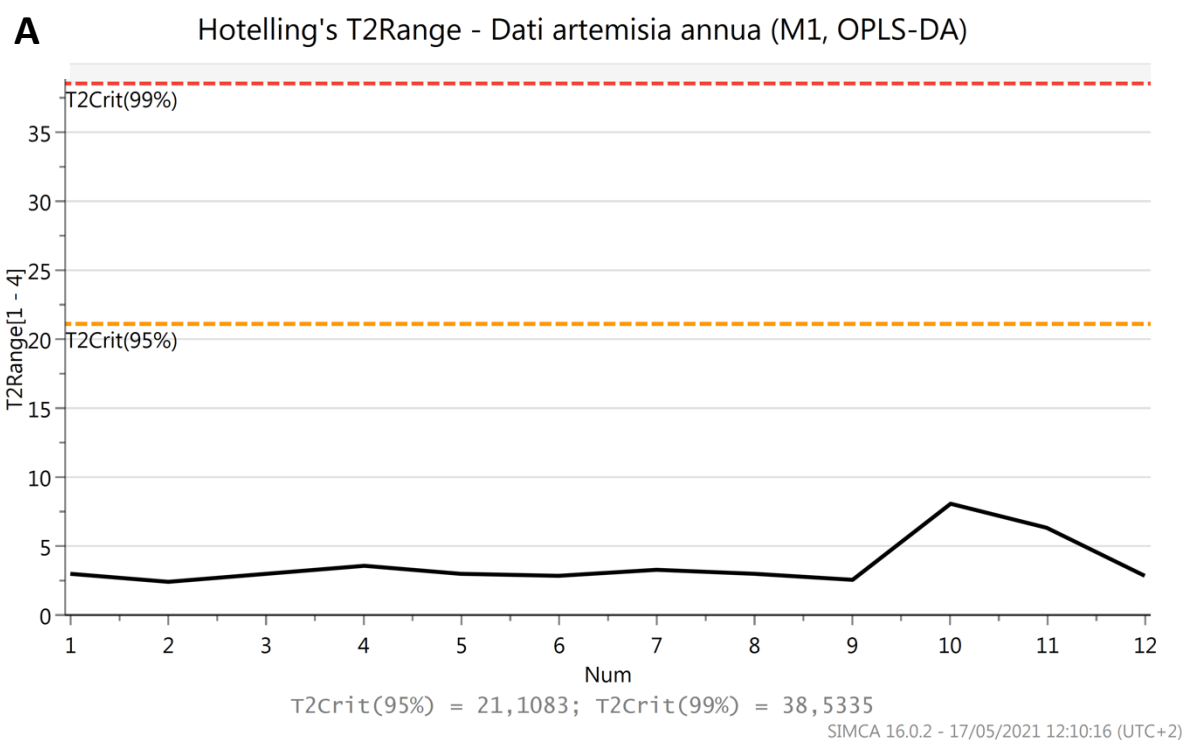

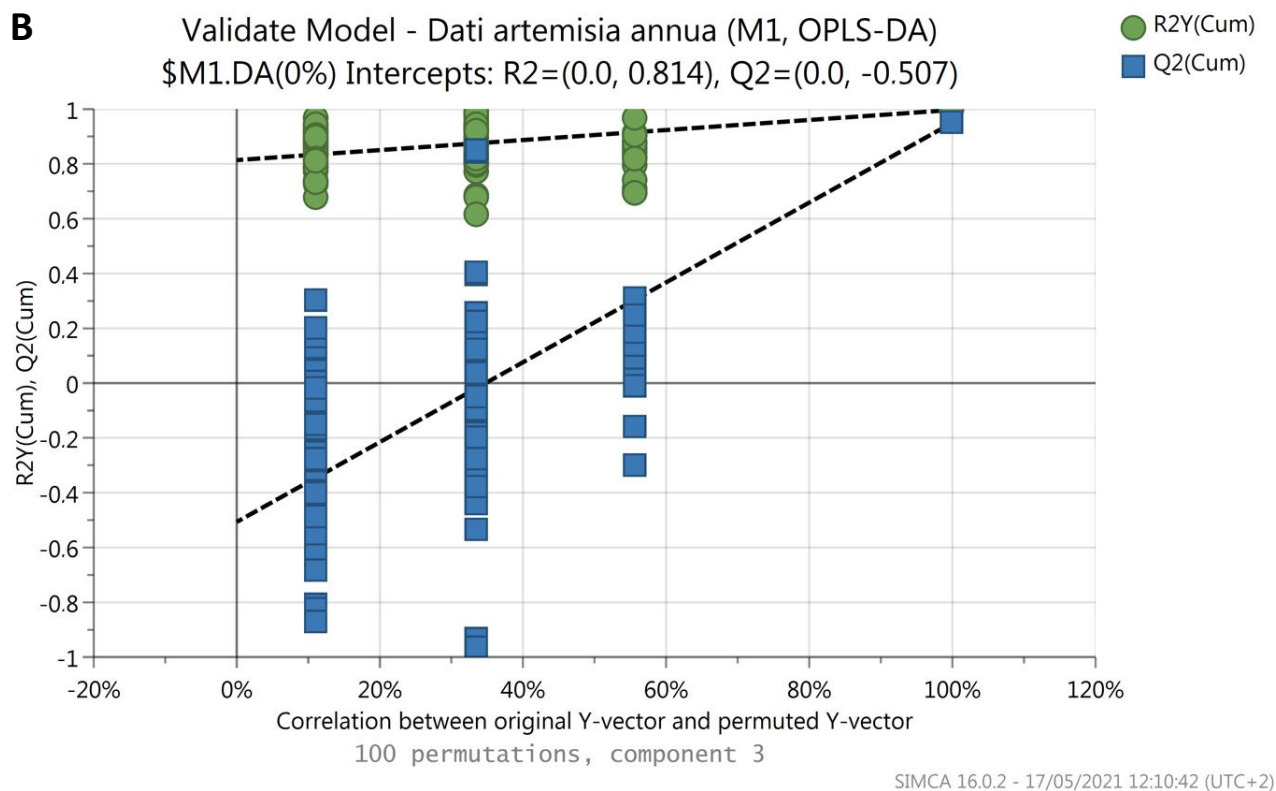

**Figure S2.** Validation of OPLS-DA discriminant model of bioactive compound classes detected in four hydroalcoholic phytoextracts of *Artemisia annua* (Aa); Hotelling's T2 using 95% and 99% confidence limits is given in upper pane [A], whereas outcome of permutation test (N = 100) is given in the lower one [B].
