# Supplementary material for: Phytochemical Analysis and Anti-Inflammatory Activity of Different Ethanolic Phyto-Extracts of Artemisia annua L
Source: Biomolecules. 2021 Jul 2;11(7):975. doi: 10.3390/biom11070975 (PMC8301839; doi:10.3390/biom11070975)
Supplement: Supplementary file 1 [file biomolecules-11-00975-s001.zip › biomolecules-1262537-supplement.xlsx]

## Sheet: DataSet
			EtOH 0%			EtOH 25%			EtOH 50%			EtOH 90%
Compound	Class	Sub-class	Artemisia annua_4-r001	Artemisia annua_4-r002	Artemisia annua_4-r003	Artemisia annua_2-r001	Artemisia annua_2-r002	Artemisia annua_2-r003	Artemisia annua_1-r001	Artemisia annua_1-r002	Artemisia annua_1-r003	Artemisia annua_3-r001	Artemisia annua_3-r002	Artemisia annua_3-r003	CompositeSpectrum
Pelargonidin	Flavonoids	Anthocyanins	1	1	1	1250321	1246787	1234043	2378367	2382474	2498278	5450154	1	5536902	(271.0583, 84405.57)(272.062, 13988.357)(281.04828, 893.9779)
Cyanidin	Flavonoids	Anthocyanins	1260446	1024009	817162	11355164	9647795	9432065	548939	18861412	747079	39046260	1	38323224	(287.05267, 283045.53)(288.05682, 44687.53)(289.0618, 3722.58)(274.06204, 438.3)
Peonidin	Flavonoids	Anthocyanins	867242	930688	878613	4330710	4445108	4301840	7230506	7485663	7575675	16590001	17891000	17927756	(301.07068, 246225.77)(302.07553, 42136.94)(303.0784, 9319.222)(304.08453, 502.745)(283.06116, 17330.43)(284.06558, 1943.91)(285.069, 204.82)(286.88333, 677.42596)(325.06995, 257.875)(306.79782, 3091.1692)(311.07004, 1430.8701)
Pelargonidin 3-O-arabinoside	Flavonoids	Anthocyanins	208432	132964	184651	659401	674652	817725	1304018	254510	1382140	389265	342844	385846	(405.11176, 13349.803)(406.361, 3400.165)(407.1014, 304.1)(385.59375, 13685.578)(386.09534, 3521.475)(387.0876, 2249.18)(388.0845, 141.19)(405.10873, 11411.232)(406.1125, 2558.4326)(388.86285, 1415.43)(444.9245, 18042.139)(445.92862, 5456.164)(446.0711, 327.93)(426.85748, 7522.7554)(428.35187, 4222.914)(428.06564, 5463.033)(428.09396, 3213.0134)(408.49332, 10073.026)(410.2077, 3365.5176)
Cyanidin 3-O-arabinoside / Cyanidin 3-O-xyloside	Flavonoids	Anthocyanins	1542036	1205431	330370	192945	750851	181340	185511	185819	397991	911598	720289	145530	(420.09818, 2956.2935)(420.9358, 2647.3884)(423.1019, 3887.695)(423.0955, 27999.73)(402.51883, 2815.527)(422.3679, 942.73755)(424.1165, 1846.4434)(423.1235, 1951.53)(424.1268, 635.7)(404.01443, 4283.3735)(406.1071, 3969.2217)(406.60675, 1816.13)(459.88947, 2629.9683)(461.46387, 1163.2019)(463.4004, 3698.67)(443.3117, 9099.462)(445.67023, 6002.13)(446.0711, 199.1)(443.08868, 3669.3872)(444.81442, …
Pelargonidin 3-O-galactoside / Pelargonidin 3-O-glucoside	Flavonoids	Anthocyanins	3036422	3273633	2934921	5378569	4806484	4617534	4530419	5043444	4402193	7162661	7072572	1	(433.1088, 123465.32)(434.11267, 28172.498)(435.1185, 5217.2563)(415.11078, 14445.247)(416.1141, 4539.567)(416.11972, 4356.87)(476.08093, 1391.2476)(477.0825, 1895.88)(457.64645, 741.9057)(457.0683, 3531.28)(458.0723, 925.86)(459.0807, 1185.46)(459.8456, 2036.5236)(461.36142, 2034.9326)(462.1158, 213.98)(439.0914, 1761.818)
Delphinidin 3-O-arabinoside / Delphinidin 3-O-xyloside	Flavonoids	Anthocyanins	767683	514109	571101	282305	562160	1	280353	1	332580	1069382	1023382	1012079	(436.8929, 5982.042)(438.10266, 989.995)(417.0857, 2381.743)(418.1036, 184.15)(438.6773, 16001.271)(438.70087, 8552.643)(439.85233, 2550.0625)(420.99408, 3739.8289)(422.76804, 17282.467)(423.09354, 14375.415)(476.23233, 334.68167)(478.3069, 966.9551)(479.0528, 569.77)(456.44537, 2541.521)(458.38318, 923.7767)(459.04578, 1285.165)(459.09122, 997.19806)(461.42917, 212.92)(462.59393, 395.76)(441.374…
Petunidin 3-O-rhamnoside	Flavonoids	Anthocyanins	878586	1030760	897289	332502	361635	292431	393345	192444	788492	1271256	1	1221261	(447.12643, 4389.9614)(448.13345, 1462.58)(449.11838, 288.17334)(431.11572, 6617.0273)(448.94208, 3539.412)(450.14124, 714.2125)(451.14288, 229.77)(453.1459, 4554.84)(454.1486, 925.13)(431.73062, 7542.629)(432.9142, 1496.3644)(433.1302, 5394.7153)(434.1481, 605.61)(435.1288, 1196.41)(489.08942, 3467.648)(491.3488, 1084.9525)(473.08264, 1034.7775)(472.90555, 563.3467)(473.9634, 4120.8755)(475.8848…
Cyanidin 3-O-galactoside / Cyanidin 3-O-glucoside / Peonidin 3-O-arabinoside / Petunidin 3-O-arabinoside	Flavonoids	Anthocyanins	1903366	2147647	2364601	1055143	1002657	917850	1004298	998328	965655	1739519	1771345	1765423	(449.10486, 25830.154)(450.11057, 5513.902)(451.1125, 596.29376)(431.09586, 38552.52)(432.1005, 16550.203)(435.6193, 759.31)(438.13, 371.78)(473.06226, 854.105)(477.11142, 1351.272)(477.1014, 2384.14)(478.1184, 316.71)(457.1058, 321.04)
Peonidin 3-O-galactoside / Peonidin 3-O-glucoside	Flavonoids	Anthocyanins	930536	834948	939177	891836	637885	526173	305203	476102	701896	1	1	1	(464.70102, 5605.04)(464.12662, 1737.4099)(465.125, 484.15665)(445.11377, 15422.516)(446.117, 4062.643)(447.11517, 812.495)(502.08066, 4568.4717)(486.10748, 12777.469)(469.10956, 3091.305)
Delphinidin 3-O-galactoside / Delphinidin 3-O-glucoside	Flavonoids	Anthocyanins	804245	1	722920	1	1	1	1	1	1	1	1	1	(465.10715, 1050.3501)(447.09616, 7193.7246)(448.095, 2902.89)(506.0645, 499.83002)(507.064, 1922.16)(508.0715, 346.04)(486.04684, 1737.485)(489.1069, 804.94)(492.59912, 999.075)(493.1062, 129.98)(471.0772, 2571.6602)(476.0948, 350.96)
Petunidin 3-O-glucoside / Petunidin 3-O-galactoside	Flavonoids	Anthocyanins	819950	685212	378641	228678	201806	1	1707587	1487172	1133722	8655401	7227629	8463256	(479.40152, 99353.57)(480.11765, 27581.44)(481.12143, 6197.357)(482.12875, 710.52)(462.9862, 3234.51)(462.11023, 427.97)(463.12143, 874.6533)(465.115, 944.7)(521.08954, 692.825)(500.74606, 10316.366)(502.0805, 1394.8601)(502.7151, 3396.134)(485.35223, 3166.2773)(486.10214, 960.13)(488.1025, 936.61)
Cyanidin 3-O-(6''-acetyl-glucoside) / Cyanidin 3-O-(6''-acetyl-galactoside)	Flavonoids	Anthocyanins	1	454989	409608	1	2886729	2855697	224627	966732	3357222	3958199	2261087	3451737	(491.11853, 6722.17)(473.77213, 29988.633)(474.1057, 9176.565)(495.80835, 9329.222)(494.12927, 3156.5)(475.62537, 1730.2426)(478.1374, 228.75)(532.68494, 2459.696)(514.68207, 8519.854)(516.3406, 11149.697)(517.5925, 49321.133)(518.0928, 22149.24)(514.912, 2636.158)(517.1175, 3377.46)(496.68048, 52903.426)(497.7147, 14014.158)(498.1227, 3487.4902)
Malvidin 3-O-glucoside	Flavonoids	Anthocyanins	436955	409114	276685	277737	465978	401074	709713	770953	479501	3006714	2484589	2891654	(494.91656, 43076.156)(494.84933, 13933.984)(495.13828, 888.56665)(476.52997, 7628.622)(477.38397, 2014.7039)(496.14746, 1426.51)(499.169, 1104.01)(480.81387, 2003.5065)(535.104, 8531.706)(536.1074, 1561.3334)(516.09143, 997.27)(517.0923, 209.48)(518.33496, 10816.681)(518.88586, 2238.1301)(499.1193, 29394.385)(500.12448, 8791.594)(501.1276, 341.775)
Delphinidin 3-O-(6''-acetyl-galactoside) / Delphinidin 3-O-(6''-acetyl-glucoside)	Flavonoids	Anthocyanins	319773	280453	284198	1	1	1	1	1	1	162335	67064	1	(507.10168, 1236.36)(508.1012, 198.36)(489.1063, 1036.7833)(512.6304, 306.46)(491.1188, 6239.9937)(493.7893, 1996.0566)(494.1326, 2650.73)(551.0702, 1684.71)(529.06866, 9102.87)(530.4024, 715.83)(531.0781, 3843.98)(531.78375, 1135.0099)(535.1076, 2185.82)(534.12, 188.42)(512.6928, 5443.124)(514.0908, 633.98663)(515.09906, 5012.5366)(518.1221, 219.51)
Peonidin 3-O-(6''-acetyl-glucoside) / Peonidin 3-O-(6''-acetyl-galactoside)	Flavonoids	Anthocyanins	1940371	606258	577141	608681	2231444	2189013	685602	1	876242	1091551	512701	649286	(507.57916, 1580.3188)(509.63672, 1444.25)(487.1294, 1246.5043)(508.58566, 1868.8713)(508.1454, 1325.53)(490.92154, 13597.831)(492.58203, 3996.9001)(493.1481, 1314.925)(545.7617, 2090.04)(547.0957, 165.99666)(547.09534, 149.435)(531.1041, 7202.675)(532.10785, 1591.05)(529.40436, 9646.5625)(530.1321, 2472.9111)(531.1312, 120.08)(511.84796, 5710.077)(514.9297, 3881.92)(515.1289, 8724.375)(516.1359,…
Pelargonidin 3-O-(6''-succinyl-glucoside)	Flavonoids	Anthocyanins	360176	272640	244673	318420	345716	321542	529005	415454	452162	4311720	4164039	3887011	(516.1312, 1444.46)(540.1384, 2558.74)(517.12915, 41402.39)(519.1377, 11077.104)(519.13214, 3873.7634)(573.0849, 2325.97)(555.0838, 4281.5)(557.09247, 1660.39)(559.43317, 6398.7734)(560.10266, 1715.98)(558.12726, 4116.575)(558.12585, 736.5367)(539.112, 23355.838)(540.11664, 6147.143)(541.1029, 2846.495)(543.1298, 164.93)
Petunidin 3-O-(6''-acetyl-galactoside)	Flavonoids	Anthocyanins	1	388925	577532	1	1	1	1	1	1	1	1	1	(521.7966, 1210.1766)(527.1387, 7620.56)(503.1225, 557.645)(528.1469, 683.11)(505.8076, 3961.8933)(508.1458, 848.44)(565.1068, 1762.615)(566.1027, 469.75)(544.12244, 10943.801)(527.78394, 1850.8568)(530.791, 1797.2001)(532.1219, 430.36)
Petunidin 3-O-(6''-acetyl-glucoside)	Flavonoids	Anthocyanins	156276	388925	577532	323680	401594	557001	610040	727119	401847	1026061	2206464	813210	(522.1303, 948.7225)(526.1395, 4132.985)(505.12616, 2459.7002)(507.1275, 332.31)(509.14374, 2151.62)(523.0074, 3848.77)(523.157, 1102.0466)(508.0222, 5502.336)(509.80606, 741.3833)(564.69714, 1674.1381)(565.7607, 993.38666)(566.0911, 502.51)(545.0945, 3151.4736)(546.0966, 335.27667)(547.09534, 289.40997)(546.5361, 6146.012)(548.14545, 1839.5967)(528.62115, 7064.664)(530.2057, 1564.6158)(531.3951,…
Pelargonidin 3-O-(6''-malonyl-glucoside)	Flavonoids	Anthocyanins	1437912	1253105	1225997	867977	738955	606077	845557	813853	839709	2862031	1	4838186	(522.3688, 1027.6863)(522.6188, 173.59999)(501.44272, 531.75336)(525.5328, 519.724)(504.4633, 1014.02325)(506.1169, 109.31)(564.0967, 125.64333)(543.07074, 1738.15)(543.0781, 525.53)(544.7811, 2696.0935)(544.113, 197.59666)(525.5925, 3918.657)(528.1121, 710.7517)(529.11816, 383.68)
Malvidin 3-O-galactoside	Flavonoids	Anthocyanins	937553	362265	433020	719784	751201	792880	1	290542	1	2076591	918712	1689213	(529.94275, 5531.3247)(531.7103, 2608.706)(533.0963, 5348.575)(534.1197, 109.91)(510.089, 145.84)(529.5199, 7764.8604)(530.6187, 1757.23)(511.764, 7404.69)(512.75934, 466.69666)(514.0952, 2890.5298)(518.1226, 176.82)(569.31335, 1215.535)(549.7226, 9441.426)(552.5449, 1480.84)(553.0455, 3962.18)(552.8432, 939.685)(556.7771, 3301.9597)(559.1101, 682.20496)(533.0814, 900.63)
Malvidin 3-O-(6''-acetyl-galactoside)	Flavonoids	Anthocyanins	3024420	2463719	2272798	1	1	1	1	1	1	1	1	1	(535.1475, 79557.56)(536.1486, 18573.424)(537.1469, 9130.301)(538.1461, 848.12)(518.1232, 289.35)(520.1606, 2244.2698)(521.1469, 264.16)(563.1417, 975.1)
Cyanidin 3-O-(6''-malonyl-glucoside)	Flavonoids	Anthocyanins	458111	317246	289406	390795	283899	239939	468965	468789	430625	1206299	1241844	1163643	(536.5077, 6457.3506)(537.7118, 2477.5)(539.5109, 34906.547)(540.1135, 15949.62)(517.7581, 11640.647)(518.0941, 5110.303)(537.1265, 658.5)(538.11926, 627.08496)(539.1224, 6071.135)(540.1248, 533.71)(521.122, 1338.8234)(522.1283, 123.74)(577.5766, 2548.8865)(579.4905, 4309.09)(580.0909, 1541.0533)(561.36316, 6752.687)(560.10266, 2719.8733)(541.43384, 2755.431)(544.0955, 1305.2975)
Malvidin 3-O-(6''-acetyl-glucoside)	Flavonoids	Anthocyanins	3024420	2463719	2272798	373630	390852	365081	279623	306505	296496	4933717	736630	6810451	(537.654, 40906.28)(536.1486, 18573.424)(537.1469, 9130.301)(538.1461, 848.12)(517.37805, 31371.447)(518.13385, 10901.177)(519.13306, 3181.9849)(520.1606, 2244.2698)(521.1469, 264.16)(559.09894, 10578.921)(561.107, 2852.3152)(562.14386, 535.25)(540.7942, 14763.505)(542.1322, 4688.995)
Vitisin A	Flavonoids	Anthocyanins	319457	400687	414354	509689	576023	602503	1060617	626474	396860	453094	573839	418604	(545.12866, 1865.03)(564.47833, 1216737.0)(565.4825, 333280.4)(566.4883, 79814.664)(568.1583, 19861.59)(547.13855, 102371.28)(548.1421, 28445.598)(549.1475, 7514.8433)(602.42914, 7335.0566)(604.1048, 1109.6028)(584.4539, 17499.732)(585.45935, 3712.384)
Cyanidin 3-O-(6''-succinyl-glucoside)	Flavonoids	Anthocyanins	1	1	1	582122	381132	333498	1	257116	255641	426297	1	1	(554.37683, 1627.7025)(553.1209, 545.68)(554.1259, 1154.19)(555.1276, 1251.73)(531.1146, 3938.4932)(552.1277, 863.19)(555.1294, 1187.24)(556.1395, 640.52)(537.13336, 551.5283)(591.3045, 4047.4077)(573.0945, 667.942)(574.3241, 1433.168)(575.1221, 688.53)(556.77844, 1137.5067)(558.11725, 3072.045)(559.1094, 1442.96)
Pelargonidin 3-O-sambubioside	Flavonoids	Anthocyanins	269293	223078	224351	2244796	2140614	1833777	1824263	1851977	1347614	967753	851618	848241	(566.04065, 31324.152)(566.15686, 13379.8)(567.1629, 3438.1501)(547.14124, 7688.9233)(548.1443, 2011.995)(549.1573, 407.81)(551.1765, 589.08)(604.1224, 1055.95)(587.6104, 2903.4976)(589.1424, 1354.4501)(571.1355, 15608.737)(572.13916, 3945.7302)(573.14795, 882.654)
Pelargonidin 3-O-rutinoside	Flavonoids	Anthocyanins	992416	680355	846988	1	1604243	1537296	2465252	2631304	1341328	1448227	1	1954536	(579.1661, 30965.85)(580.17053, 9135.215)(581.1775, 2128.902)(582.1841, 129.56)(562.9238, 2911.3389)(564.67444, 1899.155)(563.181, 3155.05)(603.4141, 2054.0024)(606.6025, 3312.6116)(607.77795, 5061.404)(608.1784, 4925.73)(589.16876, 1468.89)
Delphinidin 3-O-sambubioside	Flavonoids	Anthocyanins	662588	814163	767978	462850	724779	746708	304115	429343	443840	509815	302559	463444	(580.1463, 7064.235)(582.1488, 2584.75)(583.1496, 256.19)(601.8261, 117.94)(581.14575, 14430.001)(582.1495, 3322.0977)(583.156, 1341.9491)(621.12823, 453.85336)(605.1306, 3061.69)(606.70715, 3180.9915)(606.7983, 1852.5267)
Cyanidin 3-O-(6''-dioxalyl-glucoside)	Flavonoids	Anthocyanins	1	406922	424544	383494	386996	341331	300398	303413	353289	337613	240408	279082	(593.08234, 6719.503)(594.0653, 14786.25)(595.0689, 1866.6937)(574.04724, 1050.8812)(578.07275, 17131.514)(579.0676, 334.47)(598.5541, 6809.2754)(598.8032, 2535.5999)
Cyanidin 3-O-(6''-p-coumaroyl-glucoside)	Flavonoids	Anthocyanins	2065081	1794405	1688053	2443619	2478312	2547496	3743589	3862291	3188883	1854780	1521207	1766132	(595.16003, 74193.945)(596.1635, 21251.89)(597.16614, 6747.7485)(598.17206, 1086.7533)(580.57623, 6206.5713)(582.4874, 1473.6333)(583.1622, 2734.2898)(580.7209, 5910.7397)(582.31854, 995.9216)(583.1576, 3447.55)(584.16516, 331.43)(635.12756, 761.43)(623.1384, 462.16498)(605.14264, 987.4075)
Cyanidin 3-O-rutinoside / Pelargonidin 3-O-sophoroside / Petunidin 3-O-rutinoside	Flavonoids	Anthocyanins	877753	942120	579790	4811775	400583	5297984	1539461	1950094	1185543	3668063	2770724	586625	(595.16235, 26351.893)(596.16907, 6898.668)(597.1676, 2719.93)(577.1565, 11937.259)(578.1643, 3633.9316)(579.15295, 1215.44)(597.1755, 10391.67)(598.1792, 2769.3)(579.568, 35736.312)(580.76917, 11406.692)(581.1747, 3766.99)(582.6844, 764.57)(634.7895, 1598.35)(635.1304, 1870.86)(621.82684, 1335.3633)(602.9557, 840.704)(604.32855, 2319.9766)
Peonidin 3-O-rutinoside	Flavonoids	Anthocyanins	1242041	1081713	293019	5200779	5399571	5487743	283100	417886	199683	7974798	7132784	7225626	(609.1863, 7115.0728)(610.19293, 2004.7133)(597.16956, 1866.1401)(611.197, 14281.485)(612.19824, 5002.015)(613.18024, 39723.895)(614.183, 12783.235)(615.1894, 4807.255)(616.1868, 586.27)(595.2029, 1910.7051)(596.20575, 518.9)(597.1803, 2856.7002)(651.1499, 7167.1445)(652.1536, 1696.7999)(632.7108, 23227.057)(634.3071, 14006.313)(635.1405, 11939.952)(636.1413, 5042.74)(633.4285, 877.62)(637.38495,…
Cyanidin 3-O-sophoroside / Cyanidin 3,5-O-diglucoside	Flavonoids	Anthocyanins	2683793	2091608	1245521	2573667	2023927	2132640	2822289	2976450	2291710	2257724	1489584	1737413	(611.56384, 7844.7217)(613.5112, 5197.92)(615.68726, 1265.01)(595.16, 75863.85)(596.1635, 22033.514)(597.16766, 5743.9136)(598.17206, 1086.7533)(635.1162, 267.93)(617.1447, 2484.6975)(621.65546, 800.64996)
Peonidin 3-O-(6''-p-coumaroyl-glucoside) / Pigment A	Flavonoids	Anthocyanins	385401	268437	212238	448273	393760	1	438680	418984	243880	1194203	969663	1045797	(611.83234, 14996.698)(612.8364, 4425.3623)(614.68414, 2758.6426)(595.1605, 36238.285)(596.1656, 11304.2)(597.1689, 2515.2412)(634.4631, 3153.6133)(635.1247, 696.22)(633.14355, 4439.515)(634.1395, 2025.145)(617.1504, 831.9717)
Cyanidin 3-O-(6''-caffeoyl-glucoside) / Delphinidin 3-O-(6''-p-coumaroyl-glucoside)	Flavonoids	Anthocyanins	2444315	1910794	1932557	1	2579411	2574635	1	2549239	1	3443594	2061616	5286523	(614.7523, 6114.77)(612.1592, 4137.86)(613.1637, 629.75)(593.13116, 711.51)(594.1384, 150.21)(615.9069, 788.63)(599.1358, 160.77)(635.114, 621.78)(634.62805, 710.84503)
Cyanidin 3-O-sambubioside	Flavonoids	Anthocyanins	1	1	142079	570406	148173	281735	248162	229259	251393	264096	218526	222061	(618.1223, 4982.947)(619.13116, 8475.977)(601.77716, 1306.1034)(603.1136, 452.03665)(617.1273, 2873.12)(601.1057, 3822.4075)(602.62524, 1647.9075)(603.7839, 5817.643)(604.12036, 1690.56)(605.11707, 43161.65)(606.1207, 13695.385)(607.1468, 8151.16)(641.0769, 5441.47)(643.0721, 1509.23)(643.0957, 163.81)
Malvidin 3-O-(6''-p-coumaroyl-glucoside)	Flavonoids	Anthocyanins	348123	279519	390701	528277	568272	1	1040824	1090156	798657	1396647	1034598	1330248	(624.92377, 7374.214)(625.6771, 3289.4648)(625.1875, 1980.3501)(641.1649, 40790.637)(642.1685, 12186.275)(643.1718, 2841.6938)(663.14844, 1367.2738)(664.1528, 216.66)(665.1683, 213.56)
Petunidin 3-O-(6''-p-coumaroyl-glucoside) / Pinotin A	Flavonoids	Anthocyanins	160733	138543	1	540550	612848	1	103817	231914	1	474705	632037	446667	(625.1688, 10876.605)(626.17175, 2486.395)(608.14624, 9222.04)(608.1487, 4411.365)(610.4435, 13753.542)(612.16125, 4876.704)(613.16943, 1220.7733)(651.1505, 8157.268)(652.1556, 1994.0621)(633.13684, 8428.569)(634.1398, 2619.4233)(635.13464, 722.91003)
Pelargonidin 3,5-O-diglucoside	Flavonoids	Anthocyanins	1128157	1297348	1370940	1049802	997238	936257	894016	850455	928091	189710	246332	292146	(633.141, 23061.434)(634.1422, 12105.174)(635.1406, 9270.654)(636.141, 3954.8)(637.1396, 827.596)(633.1422, 34304.53)(634.1427, 19802.164)(635.14056, 14576.859)(636.1407, 4768.5747)(637.1398, 1271.345)(653.11395, 727.13)
Delphinidin 3-O-glucosyl-glucoside / Delphinidin 3,5-O-diglucoside	Flavonoids	Anthocyanins	1920848	1875676	2009668	229195	245784	291681	1627684	444194	1569194	2220706	1261259	2868107	(633.1823, 270.86)(630.1861, 8548.807)(631.18616, 2830.9321)(632.1846, 435.22)(611.156, 46370.457)(612.1598, 13087.574)(613.1648, 4015.42)(649.11584, 17647.291)(650.11646, 9271.967)(651.11444, 8041.8423)(652.11487, 2661.6619)(653.1136, 829.48)(651.15, 10291.386)(652.1541, 2448.2515)(633.13983, 22943.693)(634.14197, 13962.825)(635.14056, 13449.953)(636.14087, 4411.67)(637.1395, 1082.45)
Petunidin 3,5-O-diglucoside	Flavonoids	Anthocyanins	131179	111118	1	160118	198860	233011	1422675	1499575	1082753	1819668	1402109	1765089	(641.1647, 52426.016)(642.16846, 16079.594)(643.1722, 3887.25)(624.8844, 2884.5)(626.8392, 933.17)(629.1856, 1555.62)(645.2027, 1689.68)(625.5697, 8794.084)(626.9214, 2537.68)(627.85724, 1623.1901)(664.1528, 300.92)
Delphinidin 3-O-feruloyl-glucoside	Flavonoids	Anthocyanins	1	1	1	648353	725267	809534	1394340	1478926	1066589	1719538	1343121	1966201	(641.16473, 44156.26)(642.1685, 13520.947)(643.17206, 3143.128)(626.77057, 586.362)(664.1528, 285.08)
Malvidin 3,5-O-diglucoside	Flavonoids	Anthocyanins	1	1	1	112185	116459	159762	227227	230199	113363	132201	229286	325936	(655.1812, 8204.42)(656.188, 1930.1786)(657.1838, 652.02)(637.18787, 1434.295)(658.54205, 4150.9834)(661.6996, 2618.3198)(662.2126, 100.17)(641.2114, 2013.09)(697.1548, 2246.7751)(698.15857, 537.125)(699.1747, 326.05)(679.1892, 1016.42)(665.1908, 3377.1)(666.1946, 809.92)
Malvidin 3-O-(6''-caffeoyl-glucoside)	Flavonoids	Anthocyanins	1	1	1	102190	116459	159762	1	1	1	1	453380	570451	(655.97205, 14793.708)(656.978, 3902.1921)(659.1687, 1172.735)
Pelargonidin 3-O-glucosyl-rutinoside	Flavonoids	Anthocyanins	1	601317	618892	680011	638047	644779	1	1	1	196650	176927	237280	(723.22003, 2299.2766)(742.23334, 3773.32)(724.20404, 3095.157)(781.1791, 28779.99)(782.17957, 20317.012)(783.17755, 16809.717)(784.17737, 7016.927)(785.1758, 2669.468)(767.23145, 879.10333)(770.25024, 1195.8)(751.8957, 1914.1699)(752.2235, 2667.22)
Cyanidin 3-O-xylosyl-rutinoside	Flavonoids	Anthocyanins	1	1	1	1	1	1	1	1	1	169611	97171	156242	(730.55, 871.3467)(729.2096, 5458.18)(730.2107, 607.66)(711.20197, 9907.483)(712.2132, 3879.87)(715.2031, 2877.775)(737.18427, 1505.43)
Cyanidin 3-O-(6''-malonyl-3''-glucosyl-glucoside)	Flavonoids	Anthocyanins	1	1	1	1	1	1	1	1	1	975970	755800	911342	(741.13434, 1236.6)(720.15576, 11435.503)(721.15894, 2176.9001)
Patuletin 3-O-glucosyl-(1-6)-[apiosyl(1-2)]-glucoside	Flavonoids	Anthocyanins	757013	781479	789637	10036191	7888492	6408291	26089452	8525627	28617948	7146758	77651812	7678971	(771.0903, 295444.72)(772.1847, 132266.19)(773.18567, 36699.395)(774.18585, 10817.217)(775.18756, 447.07666)(771.1828, 603040.6)(772.1857, 246720.16)(773.1852, 71095.94)(774.1841, 14764.47)(775.1865, 1249.325)(797.1967, 1916.84)
Cyanidin 3-O-glucosyl-rutinoside	Flavonoids	Anthocyanins	793497	914927	943969	979031	935946	949942	998696	923597	915342	160142	177000	152674	(781.1795, 24700.658)(782.17944, 17444.533)(783.17755, 14373.931)(784.1772, 5878.553)(785.1757, 2865.7546)(780.2204, 2652.8733)
Patuletin 3-O-(2''-feruloylglucosyl)(1-6)-[apiosyl(1-2)]-glucoside	Flavonoids	Anthocyanins	277751	272864	324176	391648	369864	376869	439824	440004	441530	175564	349664	213063	(966.2423, 228.55)(1003.2373, 7811.4414)(1004.23584, 6647.2637)(1005.23413, 2651.29)(1006.2313, 321.01)(988.2519, 2550.7478)(990.2272, 376.47003)(972.23895, 2993.9402)(974.217, 550.565)(975.2178, 480.07)
(-)-Epicatechin / (+)-Catechin	Flavonoids	Flavanols	3382414	2520605	2838452	4924115	2607281	1	845402	868700	894886	486985	539977	480824	(290.0807, 8555.255)(272.31677, 1613.1675)(275.08, 3428.26)(276.0835, 964.38)(277.0841, 1492.6)(292.08655, 8931.303)(293.09363, 2475.9575)(294.09177, 738.305)(273.50766, 14215.823)(274.57956, 3350.3164)(276.0835, 1549.94)(277.58835, 811.48)(278.0957, 1867.43)(330.41666, 2939.4287)(330.0573, 2849.65)(313.75165, 12597.495)(313.03467, 1955.7976)(313.70963, 5144.4604)(314.7363, 254.54665)(296.76288, …
(-)-Epigallocatechin / (+)-Gallocatechin	Flavonoids	Flavanols	1	1	257016	1065482	1064963	988127	1488167	1597916	1551854	1045844	1030938	1035601	(306.0664, 158.8)(288.46173, 864.73596)(293.0785, 706.36)(310.5884, 322.4225)(289.06897, 73468.4)(290.07327, 11717.216)(350.33194, 6352.3325)(351.0456, 4719.51)(331.03333, 2586.4077)(329.63705, 27787.896)(330.06647, 6144.77)(331.0759, 578.31)(315.06165, 1441.1074)
(-)-Epicatechin 3-O-gallate / (+)-Catechin 3-O-gallate	Flavonoids	Flavanols	599561	644486	609042	268597	328289	1	1	713444	759737	2795607	2633573	2062002	(442.84503, 27180.172)(444.09677, 8203.487)(445.1057, 6184.07)(424.47565, 835.974)(445.38623, 30769.314)(444.1008, 9567.65)(445.10364, 317.465)(427.08902, 19535.836)(431.09717, 75934.41)(469.05066, 783.31)(471.09338, 328.66)(450.0819, 18096.664)(448.0726, 7914.1904)
(-)-Epigallocatechin 3-O-gallate / (+)-Gallocatechin 3-O-gallate	Flavonoids	Flavanols	339467	248280	427899	470842	421989	1057122	260431	653171	388004	1300857	159750	967522	(459.09213, 1610.9159)(462.0861, 257.71)(441.0771, 2119.2239)(459.1013, 2106.5388)(443.16626, 7707.7925)(445.94873, 5768.413)(446.92978, 3413.7117)(447.098, 2994.08)(498.25406, 6206.874)(498.0753, 1290.6741)(482.05002, 681.1333)(485.0454, 1126.25)(481.52927, 6762.909)(482.53165, 1031.2018)(483.0741, 1113.65)(463.33722, 1506.8636)(465.0746, 1237.33)(468.0661, 257.85)(469.0658, 6127.31)
Theaflavin	Flavonoids	Flavanols	52572092	51898652	49182064	74654664	76360893	75867713	90549880	87077640	87531584	76722092	79272816	75037072	(570.14966, 275.6)(565.1496, 1041438.56)(566.1528, 290478.22)(567.1552, 67936.484)(568.15924, 11751.397)(569.1652, 1163.884)(547.1389, 73940.22)(548.1427, 20752.34)(549.14984, 4378.209)(603.1031, 3747.51)(604.1046, 504.23)(587.1306, 37328.293)(588.13464, 10639.839)(589.1316, 2059.9534)
Procyanidin dimer B1 / B2 / B3 / B4 / B5 / B7	Flavonoids	Flavanols	894511	337572	739879	1234885	1245340	1235289	400561	1274633	1099695	1255208	1142908	1111181	(578.9727, 5153.635)(582.146, 1632.53)(583.1583, 3145.49)(579.16583, 26702.648)(580.1701, 7758.344)(581.1763, 1703.0385)(565.1496, 710638.7)(566.15265, 199136.69)(567.1556, 46985.83)(603.10376, 2551.0845)(604.1057, 822.76)(605.1557, 873.44336)(584.12573, 4274.22)(586.6307, 15586.632)(587.8844, 15975.4375)(588.53735, 8590.893)(589.132, 3479.5867)
Prodelphinidin dimer B3	Flavonoids	Flavanols	1508748	1733596	1831077	109415	137013	181680	1197880	1124485	1	219053	156842	1	(592.1104, 4397.6475)(593.1321, 1384.0)(617.1419, 2021.83)(593.12976, 3125.8499)(594.1368, 607.875)(649.82684, 7166.11)(651.11456, 7830.378)(652.115, 2549.0122)(653.1136, 811.9067)(634.132, 10760.912)(635.1407, 13244.336)(636.14105, 4227.948)(637.1398, 1062.052)(621.1289, 688.47)
(-)-Epicatechin-(2a-7)(4a-8)-epicatechin 3-O-galactoside	Flavonoids	Flavanols	135088	176537	156852	415303	356098	319126	378365	318048	326834	484374	705137	494185	(712.2131, 911.86993)(688.1914, 7157.5728)(689.1875, 2133.81)(690.1831, 345.29)(695.1981, 7195.5146)(733.21063, 2157.11)(711.1657, 14843.527)(712.1694, 5363.6255)(713.1732, 662.86)
Theaflavin 3-O-gallate	Flavonoids	Flavanols	671571	239133	242641	792174	868188	2224772	1540921	2280041	965767	245461	1	152959	(737.0914, 44073.473)(738.0932, 7278.9517)(739.0874, 2264.24)
Procyanidin trimer C1 / C2 / EEC / T2	Flavonoids	Flavanols	538474	582716	135303	137426	122326	119767	685936	650351	124562	273380	150637	247335	(848.209, 313.02)(853.90594, 3113.5215)(854.8789, 9148.43)(855.1966, 19014.68)(887.15454, 2462.1702)(888.15643, 296.23337)(871.76965, 7248.9844)(872.1706, 8148.0493)
Theaflavin 3,3'-O-digallate	Flavonoids	Flavanols	154005	185610	200648	220305	207152	228712	213104	195486	195519	1	1	1	(871.16986, 12589.762)(872.1707, 9653.268)(873.1688, 9385.41)(874.1687, 4167.277)
Prodelphinidin trimer C-GC-C / GC-C-C	Flavonoids	Flavanols	1	1	1	97340	98868	1	1	1	1	1	1	1	(903.1674, 3298.1274)(904.168, 649.16)(887.1545, 3259.33)(888.15643, 366.74667)
Pinocembrin	Flavonoids	Flavanones	7885910	5602733	5295371	2338797	2497026	2675668	1993387	980778	540577	1987722	3082806	734474	(256.8289, 79332.4)(257.9147, 12906.698)(259.08496, 6900.0747)(260.08243, 20317.963)(239.97836, 4083.5376)(243.0796, 1170.84)(239.98466, 3658.7266)(241.32877, 1971.9025)(242.0792, 2615.52)(243.0827, 1580.48)(244.0874, 189.63)(297.18192, 712.7086)(298.54126, 2554.5024)(300.30096, 5428.48)(301.05264, 2316.1565)(280.15698, 3894.2976)(283.0356, 3258.05)(281.43362, 13876.704)(282.4103, 12073.492)(261.…
Sakuranetin	Flavonoids	Flavanones	1	1163651	1082224	969102	29820868	346252	1748822	1778863	1	1	431382	327177	(286.42184, 7895.35)(287.09167, 1362.4551)(269.57986, 1985.52)(271.4196, 5593.0234)(272.58276, 1678.1849)(288.26816, 16341.118)(288.0909, 1689.86)(270.0832, 3925.132)(271.59003, 6326.673)(273.58936, 5119.965)(274.0894, 14034.73)(327.04868, 859.946)(329.05292, 1836.6243)(329.719, 3656.41)(330.56116, 4567.33)(331.0647, 1239.49)(307.83832, 1400.114)(310.57593, 3001.0977)(312.07983, 602.27)(313.58752…
Eriodictyol	Flavonoids	Flavanones	732122	4441874	4273424	1075142	1086794	1075735	2158695	2185366	2322755	1128460	1289208	1108611	(288.20282, 2380.6558)(290.0621, 1209.14)(291.0653, 2654.17)(292.0798, 1067.85)(271.38907, 930.61993)(273.063, 1827.8467)(275.0604, 1736.57)(289.06967, 41636.434)(290.0715, 6624.796)(271.06042, 41804.246)(272.06223, 8852.137)(328.6984, 1070.0367)(330.52536, 1401.885)(332.03336, 8062.525)(333.0398, 6495.13)(315.0224, 107.91)(312.72922, 16419.193)(314.0693, 2592.43)(314.56158, 1582.42)(295.44794, 1…
Hesperetin	Flavonoids	Flavanones	1	1829778	1714316	759508	1256763	1	3305763	1	1	1034410	1	1066924	(302.362, 2575.2742)(305.0786, 1653.37)(285.0697, 1278.4875)(288.57507, 8000.9053)(289.0829, 1103.11)(303.41983, 16167.571)(305.42007, 4351.3135)(305.08978, 309.01)(286.08344, 3070.2124)(288.58704, 1725.02)(289.58362, 6325.35)(290.083, 1403.5)(344.37625, 706.81)(344.0506, 724.75)(326.5379, 1147.0024)(329.0332, 112.47)(325.0702, 7911.827)(326.06427, 2159.435)(307.30603, 3026.8823)(310.058, 286.3)(…
8-Prenylnaringenin	Flavonoids	Flavanones	3692539	2924833	1	5051015	1	3167584	3075845	1	2668704	16736476	9467654	11737056	(340.8018, 4838.0854)(342.30826, 3139.2285)(343.63818, 4725.9697)(344.80893, 4614.8867)(345.1476, 4598.95)(322.34616, 2703.8088)(325.1325, 7371.88)(327.1372, 2225.78)(341.13876, 17167.361)(342.14304, 3975.407)(324.2441, 5223.1543)(325.8024, 9131.606)(326.74017, 5229.0796)(327.9434, 5318.15)(328.1477, 3204.59)(379.09412, 26139.367)(380.09512, 7010.8677)(381.09204, 287.115)(362.7528, 1067.5347)(366…
6-Geranylnaringenin	Flavonoids	Flavanones	7179559	1	8037052	9539492	10397920	9678534	4251947	2755056	2628202	2438481	2242805	2190798	(408.1906, 11220.142)(390.4588, 4520.989)(393.19217, 12931.399)(394.20093, 3603.0432)(395.19742, 8957.0205)(409.37985, 8602.382)(410.8672, 5994.347)(412.2046, 1629.29)(414.2168, 7464.63)(391.18765, 6253.0425)(392.19168, 1445.3334)(393.1787, 964.44)(448.15225, 581.132)(429.14774, 132322.53)(430.1523, 31858.842)(431.15607, 6110.163)(432.1622, 569.57)(432.55145, 10106.206)(434.31403, 10626.702)(435.…
Naringenin 7-O-glucoside / Naringin 4'-O-glucoside	Flavonoids	Flavanones	1027153	1142770	485569	733619	602341	660068	305615	294674	302819	416016	1434422	1323474	(434.9213, 5076.246)(436.45837, 6197.78)(437.62073, 4244.825)(438.1247, 1707.45)(416.12, 14319.54)(439.5172, 6983.1313)(438.13165, 645.19995)(441.1415, 5986.03)(417.70114, 14480.937)(418.8727, 3150.3464)(419.1228, 363.99)(477.09042, 269.52335)(479.0934, 98.89)(455.92938, 2002.4043)(457.83237, 4435.2715)(459.78348, 2686.1533)(459.1024, 835.34)(439.28146, 3316.2908)(441.10693, 469.42)
Naringin / Narirutin	Flavonoids	Flavanones	1	265421	271429	1	884655	919640	790345	771791	1	1275941	1070835	1073068	(581.43805, 701.115)(585.18494, 259.97)(562.1641, 123.26)(584.1965, 438.24332)(565.737, 8635.889)(566.43506, 3268.891)(567.4757, 1651.3073)(623.4978, 1286.41)(605.143, 6673.3003)(606.3128, 1372.5416)(607.14404, 1242.6951)(606.6773, 1820.8762)(609.2012, 3401.38)(586.0576, 818.6045)
Didymin / Poncirin	Flavonoids	Flavanones	450210	497966	436289	692836	454912	952544	1	445211	1	826787	545774	559114	(595.10223, 5930.197)(596.60925, 5933.888)(597.6178, 7840.1665)(599.20703, 578.635)(577.19305, 3815.22)(578.1931, 1063.0468)(579.19934, 6515.83)(580.20905, 931.88995)(581.1848, 973.76996)(595.1977, 5630.56)(577.19543, 11138.029)(578.1961, 2920.11)(635.15137, 899.34)(637.175, 1040.1766)(619.856, 5347.1777)(619.6904, 2678.17)(621.2033, 2044.7467)(623.1878, 520.88)(600.32294, 5294.6396)(601.51636, 1…
Eriocitrin / Neoeriocitrin	Flavonoids	Flavanones	1	710527	640954	1202155	2120952	1431582	2539964	2291870	1459249	1472851	1851327	1903682	(596.1661, 9118.488)(597.1688, 3504.3503)(578.16046, 3056.5823)(600.8035, 5138.56)(600.2062, 2434.76)(579.16705, 26343.588)(580.17035, 7155.973)(581.17633, 1703.1073)(639.1479, 543.68335)(625.17584, 3511.1653)(601.90247, 654.1312)(605.16534, 1080.8134)(607.1751, 1942.7001)
Hesperidin / Neohesperidin	Flavonoids	Flavanones	1311119	1017880	956085	5161248	5411450	5975263	2581020	2384344	1	7618154	6774718	1233958	(610.49536, 5022.282)(612.1989, 3735.5066)(613.18066, 27737.914)(614.1829, 8704.863)(615.1898, 3896.0798)(616.1868, 351.76)(611.19586, 2691.7344)(597.04193, 1560.0167)(596.9568, 513.225)(598.53046, 5368.893)(599.2038, 9062.34)(651.1505, 5022.235)(652.15515, 1118.9988)(633.1376, 5573.794)(635.6553, 2027.3301)(635.1389, 346.06)(635.18286, 1243.468)(638.18695, 170.915)(618.3939, 6465.4097)(620.1965,…
Naringin 6'-malonate	Flavonoids	Flavanones	1	1	1	1	1	1	180245	238057	317847	1	294499	166275	(705.1377, 9674.51)(706.141, 2080.04)(689.16455, 12569.46)(690.1679, 3761.2434)(691.1721, 356.4)
Narirutin 4'-O-glucoside	Flavonoids	Flavanones	846138	944905	979933	1068316	1012206	1010479	1097002	1006784	1008186	195634	154666	244930	(742.233, 3927.7468)(724.2038, 3232.0066)(744.221, 2398.13)(731.224, 2234.32)(781.17883, 28968.746)(782.1793, 20502.041)(767.23065, 722.12994)(770.2512, 1121.0767)(751.23895, 1858.1166)(752.2243, 2280.0999)
7,4'-Dihydroxyflavone / Chrysin / Daidzein	Flavonoids	Flavones	835162	1	1107365	1	494500	557760	1	582427	408473	1	511028	1	(255.63452, 3746.0515)(257.20938, 5248.7456)(258.56815, 5134.018)(258.0674, 11300.4)(239.05025, 2563.48)(255.0705, 1610.21)(237.72523, 4454.4067)(239.72954, 5572.733)(241.0648, 2731.54)(298.63275, 997.492)(278.51767, 1066.5516)(279.01617, 2015.12)(278.7161, 6968.6816)(280.3031, 4576.22)(259.03915, 8664.22)(260.0461, 135.1)
7,3',4'-Trihydroxyflavone / Baicalein / Galangin / Genistein / Apigenin	Flavonoids	Flavones	523867	1106255	677533	1079424	2058838	1945865	1703556	1839558	1828009	4671516	4944399	4755145	(272.14108, 45066.527)(273.06018, 10811.226)(275.0575, 2522.41)(253.9183, 2207.2227)(255.17232, 5725.7974)(256.55447, 2640.6213)(257.05264, 3380.9968)(272.31744, 1545.0751)(273.0577, 221.11)(276.0794, 1966.25)(309.35623, 26145.053)(310.86002, 3629.3083)(292.0104, 3919.1287)(293.5477, 18636.672)(294.05136, 8174.8896)(277.03668, 8666.914)(277.75482, 1449.483)(278.0367, 250.32666)(279.04413, 1569.73…
Geraldone / Methylgalangin / Biochanin A / Glycitein	Flavonoids	Flavones	169536	514455	141757	4137041	3544719	3437612	2559719	2521954	2641228	11591118	10641591	10384763	(286.07275, 2092.2576)(286.0779, 1456.03)(288.0734, 933.04)(268.0653, 645.44495)(286.1748, 10027.355)(287.33655, 9976.66)(288.0761, 966.23)(269.07123, 5276.556)(325.33456, 1815.6859)(327.639, 623.248)(308.29648, 11132.243)(310.42963, 2145.8599)(311.03732, 6452.4897)(308.81235, 7409.0566)(312.0758, 6969.955)(290.29944, 164053.8)(290.05066, 28772.307)(291.0454, 5421.42)
Luteolin / Scutellarein / Kaempferol	Flavonoids	Flavones	1136677	1047549	1125741	853075	927388	8114346	14897738	16232392	16692917	2148028	34050968	2313775	(287.05243, 382950.84)(288.0557, 61174.15)(289.06064, 3454.6335)(291.0686, 341.71)(273.0557, 269.91)(292.06448, 1272.7032)(325.0093, 4713.444)(309.03653, 37800.633)(310.04044, 5147.4204)(311.0357, 1052.31)(293.03555, 2587.1433)
Hispidulin	Flavonoids	Flavones	1120587	1225514	1170434	1	3811769	3660384	6186671	6383349	6484097	14203097	15314322	14452732	(301.07098, 258447.52)(302.07596, 44095.65)(303.0782, 10090.986)(304.08453, 502.745)(283.06116, 18063.324)(284.06558, 2026.2866)(285.069, 213.36)(321.01022, 2624.6934)(306.50153, 6555.4614)(306.0474, 1201.1333)
6-Hydroxyluteolin / Morin / Quercetin	Flavonoids	Flavones	557055	374718	538478	716711	855683	674211	908212	835235	1082093	7061808	2071289	1111093	(303.32993, 30788.81)(304.04742, 6927.0537)(305.55234, 883.2525)(307.0541, 2529.615)(285.5391, 5827.5547)(285.0332, 4565.43)(303.1927, 50443.727)(304.25677, 15164.592)(305.56586, 1302.7151)(286.7129, 39150.22)(288.04846, 5778.8047)(343.6754, 1988.1699)(326.19556, 2097.542)(326.0004, 349.04498)(328.2417, 1846.232)(309.59677, 6662.236)(311.03192, 2198.4539)(311.0374, 4797.0)
Cirsimaritin	Flavonoids	Flavones	2445842	1256118	946267	548346	562516	620980	314235	335117	288212	1	561624	746331	(316.0867, 473.56332)(316.0864, 753.98)(318.0928, 663.21)(296.06528, 5906.03)(297.06088, 990.2767)(315.28793, 2862.462)(317.0907, 153.0)(318.0946, 418.53)(297.0759, 13209.183)(298.079, 2058.806)(299.0739, 1571.22)(300.0744, 156.97)(356.0391, 186.59)(357.0446, 118.54)(335.03857, 4536.23)(337.4485, 13773.581)(338.70096, 2448.1826)(340.0834, 1914.47)(341.0857, 717.22)(319.89383, 3673.6367)(322.5655,…
Nepetin / Isorhamnetin / Rhamnetin	Flavonoids	Flavones	683841	619704	589297	3992955	3449204	3485461	4946710	5489924	5583814	1661999	4313425	2628308	(317.609, 74293.26)(318.46646, 14303.846)(319.06958, 1506.5875)(321.07785, 1080.3467)(303.0524, 2331.1333)(317.0623, 107119.68)(318.0659, 18476.17)(319.0687, 629.18)(299.05838, 19283.074)(300.05682, 4270.654)(301.06244, 836.31494)(342.0615, 182.79)(324.05252, 1126.7067)
Cirsiliol / Jaceosidin / 3,7-Dimethylquercetin	Flavonoids	Flavones	816149	1478563	568883	948567	1660367	1634881	667369	687048	685247	914127	1	954123	(331.2008, 24009.1)(332.32928, 5769.9453)(333.08203, 2499.85)(334.08505, 3249.755)(335.09027, 1044.575)(312.06348, 2883.1934)(313.0597, 3077.65)(331.0811, 38624.3)(332.0846, 11064.675)(313.07462, 1791.4299)(314.06433, 328.15)(373.29752, 3270.5024)(373.0493, 1097.51)(374.0491, 6331.35)(375.0498, 1496.95)(354.0251, 1014.89746)(355.02954, 5167.69)(356.0387, 341.415)(354.47183, 3507.27)(357.0688, 170…
Gardenin B	Flavonoids	Flavones	1146374	1	1	16255512	16241972	16725986	33764536	35062604	35955368	48897000	47840128	49126080	(341.10095, 871.7487)(359.10904, 768506.5)(360.1124, 147212.55)(361.11023, 29252.646)(362.11328, 2500.7212)(397.07263, 16627.545)(398.07327, 2270.3403)(399.0669, 843.63)(381.09064, 202005.83)(382.09375, 40777.77)(383.09537, 6947.4746)(384.0998, 166.75)
Tetramethylscutellarein	Flavonoids	Flavones	2632598	2505660	2102851	5957537	4529685	4201181	3430041	3394907	4549983	3506170	4677783	8163155	(342.2085, 4085.7642)(343.86166, 921.995)(325.10434, 3140.0354)(327.44174, 4566.0337)(327.61185, 3644.115)(328.61542, 1160.92)(329.1174, 13208.18)(345.12067, 1235.2958)(346.62115, 919.27)(346.1169, 450.9)(326.68442, 4081.7466)(328.1188, 1210.42)(329.1134, 11016.18)(330.13, 2422.37)(381.40817, 84343.73)(382.07465, 14746.606)(363.05914, 27848.459)(364.06403, 3970.4492)(365.0572, 270.18)(366.80658, …
Cirsilineol / Eupatorin / Pebrellin	Flavonoids	Flavones	1	1456550	1380729	7473274	6646884	6490122	2444375	2399017	2531855	1	3492452	7658671	(344.09027, 4907.4824)(345.0943, 1514.015)(326.5787, 1462.1101)(328.0825, 187.58)(330.0836, 933.61)(331.0952, 2580.25)(346.10046, 51574.28)(346.0999, 14767.864)(347.10205, 4233.26)(329.2044, 2518.2375)(330.59875, 2807.0125)(330.0888, 1538.22)(331.0998, 3968.6)(386.04956, 676.635)(388.05725, 840.6)(369.0573, 1007.01)(367.20694, 7011.1074)(368.7466, 1251.2633)(371.0835, 1268.9)(349.06906, 41971.65)…
chrysosplenol D / Arcapillin / eupatin	Flavonoids	Flavones	5186583	4134863	3877661	1	58013008	56323908	135487728	146804544	139911680	121952272	145199648	121467704	(360.6427, 519490.28)(362.09137, 172694.17)(363.0943, 29149.072)(364.0974, 8054.99)(342.07803, 687.7866)(361.08875, 4884202.5)(362.0919, 939550.2)(363.09396, 158135.89)(364.09683, 19401.064)(344.09113, 3745.4954)(345.69186, 802.53)(348.0857, 531.37)(399.04288, 25712.47)(400.04626, 6401.126)(383.06992, 295291.47)(384.07294, 55696.785)(385.07578, 12518.053)(386.07864, 680.575)
casticin / 5,6-Dihydroxy-7,8,3',4'-tetramethoxyflavone / chrysosplenetin	Flavonoids	Flavones	22976286	1	18636654	164092944	110846688	110720240	91968392	90450400	89379504	1	94343208	152951168	(374.60034, 2186684.8)(376.10715, 894226.8)(377.10925, 154461.2)(378.1049, 29797.195)(379.1148, 3627.75)(356.08865, 1967.4075)(375.1041, 3661969.0)(376.10715, 751789.75)(377.10934, 129138.4)(378.11044, 19593.32)(362.1122, 5612.4883)(413.05853, 58635.406)(414.06216, 11664.899)(415.05957, 162.32)(397.08545, 606742.06)(398.08844, 120876.4)(399.09082, 20009.69)(400.09344, 2038.2787)(379.0685, 456.63)
Sinensetin	Flavonoids	Flavones	1	1	1	1	1	1	1	1	1	1	4257604	2818630	(375.1202, 372.69)(377.1418, 3955.58)(374.13312, 10419.345)(374.1309, 3889.85)(358.4669, 1701.5566)(396.06995, 550.865)(397.0674, 895.38)(398.12296, 1517.085)(380.43887, 15932.68)(381.6136, 22892.87)(382.1159, 6873.22)
chrysosplenol-D	Flavonoids	Flavones	1	430791	400682	1101597	296103	1	820214	799234	765099	1	4070769	3619212	(377.08212, 35974.63)(378.0863, 5921.4883)(379.0891, 8495.997)(380.0927, 1335.51)(381.09204, 3273.435)(358.8242, 1267.0525)(359.0701, 810.21)(377.0835, 13807.5)(378.0905, 1803.2)(361.08374, 1101.285)(381.0667, 1920.37)
artemetin	Flavonoids	Flavones	3531274	3027244	2956929	40339283	39008032	40650280	61275764	63477008	62511284	48783160	50770744	49224520	(389.1185, 78965.52)(390.12183, 15821.767)(391.12534, 1800.04)(389.11945, 1443243.2)(390.12286, 291489.56)(391.125, 50805.902)(392.1281, 5683.5728)(376.11682, 800.48663)(427.07404, 17966.998)(428.0776, 3817.7349)(429.075, 1051.34)(411.10086, 234715.11)(412.10388, 50926.14)(413.10632, 9896.756)(414.1098, 334.21802)
Nobiletin / 3-Methoxysinensetin	Flavonoids	Flavones	1	2006148	1644766	852560	863021	2954841	2026665	3223446	1	3138354	1184059	2232849	(402.467, 6325.1167)(403.88785, 3436.1824)(406.1371, 264.64)(407.1339, 6677.32)(384.68686, 15885.361)(386.4634, 15437.718)(389.1387, 4155.17)(403.13666, 18137.291)(404.1411, 4080.7324)(405.1297, 612.87)(385.53812, 10592.677)(388.146, 368.97)(443.30145, 2864.704)(444.10117, 21274.031)(444.4321, 7522.103)(445.43896, 3889.4636)(425.75208, 2700.6199)(426.5262, 42629.195)(427.41183, 11277.923)(428.461…
Apigenin 7-O-glucoside	Flavonoids	Flavones	1691330	1017281	1852951	781513	853322	789421	493037	1	434150	1	1187311	809744	(420.8893, 804.27246)(424.14557, 928.92004)(424.1486, 349.41)(402.12347, 7825.288)(403.12738, 2444.75)(421.14856, 1793.775)(403.1353, 20918.236)(404.13995, 5480.082)(405.1297, 574.57)(461.97183, 7840.1885)(463.3706, 5412.8774)(464.45474, 803.37335)(444.5355, 1807.487)(444.13452, 7012.232)(445.38492, 4384.032)(446.64014, 6695.7603)(448.1525, 1499.62)(425.56253, 12051.266)(426.12054, 4572.804)(427.…
6-Hydroxyluteolin 7-O-rhamnoside / Luteolin 6-C-glucoside / Luteolin 7-O-glucoside / Kaempferol 3-O-galactoside / Kaempferol 3-O-glucoside / Quercetin 3-O-rhamnoside	Flavonoids	Flavones	1590044	1786342	1960730	791225	834267	772311	838887	822023	789442	2671909	2001916	2506288	(432.30356, 3299.478)(435.1145, 1892.93)(449.10474, 30685.992)(450.11002, 6642.978)(451.10904, 986.87)(431.09732, 75066.586)(432.1005, 16231.675)(474.09448, 7334.5137)(472.09082, 2056.7566)(453.07016, 516.206)
Apigenin 6-C-glucoside / Genistin	Flavonoids	Flavones	668928	326434	2311600	3917298	3933702	3746478	3855654	4276864	3743131	6330235	6343269	6299494	(433.2207, 117560.07)(434.2235, 27129.025)(435.2296, 5558.3545)(414.2221, 1169.305)(415.4402, 277.15332)(419.1137, 178.4)(433.4446, 64021.668)(434.44568, 14883.516)(435.4524, 2599.7703)(416.11505, 2874.5972)(418.7859, 1556.5199)(417.1086, 258.43)(473.18274, 1150.9678)(474.68, 1395.6699)(475.41455, 982.4634)(476.0861, 309.95)(455.56866, 1089.8821)(456.3566, 1293.1042)(455.7633, 1300.2709)(461.1052…
Apigenin 7-O-glucuronide	Flavonoids	Flavones	1300144	963503	1032699	815442	1	707036	326746	271847	235907	1148801	911304	569455	(446.46176, 6976.724)(451.0978, 5379.17)(428.7411, 360.28333)(431.07254, 1650.475)(433.09448, 107.16)(447.99985, 4285.0244)(448.09604, 1318.6481)(449.08716, 474.33667)(429.07632, 7747.8315)(430.07593, 1727.155)(486.54922, 659.7025)(468.0449, 3711.7395)(469.22388, 518.265)(472.05707, 349.63)(472.0731, 2364.8743)(473.07104, 1185.038)(451.8833, 3047.6946)(452.87018, 2417.564)(453.5691, 326.84)
Chrysoeriol 7-O-glucoside / Isorhamnetin 3-O-rutinoside	Flavonoids	Flavones	1613026	1	1789976	744255	1175872	547199	839174	787777	953054	1	757776	1	(463.1263, 4609.1797)(464.12665, 1309.1099)(465.12497, 649.60333)(444.092, 3362.0)(466.12653, 4249.525)(464.1255, 2345.63)(445.11395, 13216.932)(446.11636, 3391.7625)(447.11517, 650.69)(501.08008, 8853.998)(502.08066, 2907.772)(485.482, 22081.926)(486.10724, 13438.799)(469.1088, 2736.97)
Luteolin 7-O-glucuronide / Kaempferol 3-O-glucuronide	Flavonoids	Flavones	395602	362193	278041	387672	150270	446638	295006	200483	145423	1221889	1104981	1238835	(465.75528, 33633.965)(467.09488, 17941.754)(467.76172, 7451.02)(468.0992, 3357.15)(444.6437, 12615.606)(449.0897, 515.9)(466.09503, 43213.63)(466.6963, 15230.875)(467.4287, 7878.947)(468.09753, 2336.7)(445.2707, 20030.986)(446.07498, 3881.891)(447.0695, 831.58)(504.3837, 2156.9885)(507.0616, 302.38)(485.6995, 448.9)(486.0475, 1082.48)(486.93863, 19584.297)(488.48447, 6872.5156)(489.0686, 6115.72…
Luteolin 7-O-malonyl-glucoside	Flavonoids	Flavones	102948	1	1	383656	273078	236006	455813	468789	430625	271759	376256	258325	(535.6057, 525.465)(540.1185, 504.85)(516.88806, 13697.08)(518.0941, 5110.303)(536.9095, 4919.996)(538.5164, 1218.516)(539.614, 34170.914)(540.1137, 11526.483)(520.0996, 761.91003)(578.33136, 3669.45)(579.0781, 540.37)(555.06744, 388.505)(558.09503, 5595.4136)(560.10266, 2067.17)(540.8014, 1269.1658)(544.0904, 941.22)
Chrysoeriol 7-O-(6''-malonyl-glucoside)	Flavonoids	Flavones	1	1	1	1	445240	327205	172813	197892	1	272826	253385	274354	(549.119, 12632.653)(550.12225, 2287.4932)(553.12665, 15149.122)(554.1314, 1927.9967)(531.1097, 6915.64)(532.1079, 3245.44)(553.127, 1339.2601)(554.6273, 1847.54)(555.1271, 1967.0)(531.114, 3678.36)(591.1023, 4287.29)(571.1187, 2249.31)(554.43384, 1388.89)
Apigenin 6,8-C-arabinoside-C-glucoside / Apigenin 6,8-C-galactoside-C-arabinoside	Flavonoids	Flavones	52673488	51985944	49268672	74841792	16474299	60983380	1	1	1	66763854	69478392	65755815	(565.1495, 962073.9)(566.15265, 268117.38)(567.15515, 63361.957)(568.159, 10772.596)(569.1658, 1272.47)(570.14764, 347.11)(565.15216, 518107.84)(566.1563, 142660.8)(567.1604, 34439.926)(568.159, 11328.36)(547.1399, 51332.773)(548.1433, 15812.368)(549.1491, 4301.5317)(603.10315, 4289.41)(604.1046, 489.82834)(587.1312, 36354.24)(588.13446, 11520.973)(589.131, 2672.1848)(572.8996, 3133.0198)(573.647…
Apigenin 6,8-di-C-glucoside	Flavonoids	Flavones	2749337	2477700	2407284	4592068	1424671	1	4052262	1478584	1897241	6511709	4893878	1	(576.24036, 2535.9482)(578.159, 2063.4)(579.1659, 37653.86)(580.1709, 11454.05)(581.1751, 2364.58)(618.0073, 395.19287)(577.1547, 12379.936)(578.1608, 2463.9312)(634.1261, 1330.381)(634.6294, 1048.025)(595.1604, 37251.47)(596.1657, 11216.2)(597.1713, 2503.4)(600.3928, 230.49)(604.16077, 282.65)
Isorhoifolin / Rhoifolin	Flavonoids	Flavones	788531	797194	741168	1268627	825695	1875049	978811	1570857	1284440	1653683	1383709	1591695	(578.1628, 2630.4875)(563.23956, 128874.65)(565.4039, 87390.586)(565.9886, 33772.97)(566.1552, 8706.23)(579.1661, 35659.145)(580.16986, 10181.685)(581.17664, 2438.45)(582.1841, 408.62)(561.17535, 11825.211)(562.18164, 991.06)(623.1384, 694.865)(603.1044, 3086.34)(602.24536, 1327.7462)(607.17096, 7930.2246)
Luteolin 7-O-(2-apiosyl-glucoside) / Kaempferol 3-O-xylosyl-glucoside	Flavonoids	Flavones	184575	199552	163080	1	1222711	1185543	1059944	515407	673554	595581	578614	532604	(581.14606, 14598.375)(582.14874, 3316.343)(583.15686, 1200.2072)(563.136, 606.81)(565.1522, 84563.59)(566.1556, 24192.72)(567.1574, 5754.59)(568.1615, 487.57)(581.1466, 14672.9)(582.1512, 3703.42)(583.1533, 1187.28)(565.15204, 407413.4)(566.25464, 114198.61)(567.37933, 30863.947)(568.1587, 5564.958)(569.16473, 1371.3475)(625.1098, 1673.06)(602.70605, 1819.607)(604.44293, 2225.9966)(606.0143, 183…
Diosmin / Neodiosmin	Flavonoids	Flavones	1640247	1206110	168628	2731764	2767230	2468781	336542	1104553	240532	3686674	6384504	6566602	(609.18396, 2048.534)(611.1952, 7468.4937)(612.68274, 4638.245)(613.1799, 66388.3)(614.183, 21998.25)(594.0226, 24009.184)(595.0253, 6735.57)(594.1708, 6219.8)(595.6654, 10056.67)(596.1698, 4808.42)(609.85345, 7766.447)(610.8617, 3193.45)(613.1797, 46285.04)(614.1829, 14951.49)(615.1873, 4634.99)(594.3258, 9235.421)(592.8384, 2585.0366)(594.1743, 1544.7899)(651.15094, 4192.104)(652.1548, 1252.795…
Apigenin 7-O-diglucuronide	Flavonoids	Flavones	708406	851960	848909	214955	224486	265308	497871	397162	303855	1041263	863899	1018118	(624.13104, 875.81006)(626.1181, 472.23666)(625.148, 995.26)(605.62775, 2104.635)(607.12915, 2111.5535)(649.0758, 1438.27)(627.0964, 17095.748)(628.09827, 5729.1646)(629.0994, 2507.968)
Apigenin 7-O-(6''-malonyl-apiosyl-glucoside)	Flavonoids	Flavones	1142566	1323946	1386115	271838	288560	335297	952216	283340	972428	216907	212936	217484	(651.1505, 9351.03)(652.15454, 1781.31)(633.1419, 21271.97)(634.1429, 13352.202)(635.14087, 9606.758)(636.1408, 3688.865)(637.1395, 1063.3099)
Luteolin 7-O-diglucuronide	Flavonoids	Flavones	167965	186556	190647	168321	168354	150693	588046	567484	541371	587065	852561	616780	(663.1159, 11796.898)(662.1143, 5977.8364)(663.1159, 440.81)(622.0983, 6969.053)
Chrysoeriol 7-O-(6''-malonyl-apiosyl-glucoside)	Flavonoids	Flavones	1	1	1	1	1	1	1	1	1	119830	1	92671	(685.1727, 1153.605)(683.17957, 2642.17)(707.1763, 6797.225)(708.1688, 475.93)(691.1739, 2175.18)
Formononetin	Flavonoids	Isoflavonoids	890570	1	267555	694852	698715	667835	1	259049	207174	841166	398542	187108	(269.6345, 6544.7246)(271.0848, 6610.468)(271.0862, 10920.67)(253.26944, 2928.192)(255.0735, 1928.5)(269.336, 2288.9526)(252.67622, 8158.1704)(254.33041, 8022.395)(255.0768, 515.86)(256.0799, 11615.07)(308.03558, 2736.6326)(310.5401, 1599.2849)(313.0494, 454.05)(289.3652, 1995.6266)(292.0232, 53812.43)(293.0289, 7877.38)(292.4011, 3596.1868)(293.076, 144.82)(273.55396, 6825.1367)(274.39282, 988.3…
Daidzin	Flavonoids	Isoflavonoids	686733	827232	860682	737431	674020	666057	308679	297145	307733	3281634	3089089	3147184	(416.11993, 40276.676)(417.125, 14663.577)(418.12256, 2970.28)(399.50586, 1474.4519)(417.11557, 21200.133)(418.12064, 4383.8745)(419.1228, 344.83)(400.31027, 4318.31)(400.0984, 169.09)(455.07413, 3208.665)(443.0724, 8699.327)(439.43362, 5643.5415)(440.60422, 868.9033)(421.0919, 6711.3696)
Glycitin	Flavonoids	Isoflavonoids	858190	736388	604196	332187	319569	264321	219627	164368	284070	719363	536825	882472	(446.2341, 4357.351)(447.4509, 928.12665)(449.1385, 3829.02)(450.1355, 467.82)(451.1401, 281.87)(429.25998, 1125.9413)(447.88672, 5616.0205)(448.13882, 909.56006)(449.1139, 456.57)(432.46033, 8186.3447)(432.46558, 4823.7266)(432.92432, 2015.904)(434.12793, 4470.805)(435.1212, 2048.02)(485.8846, 9147.876)(487.09192, 5046.4004)(491.0928, 766.16)(471.21906, 4103.347)(472.52612, 4825.1577)(473.12808,…
6''-O-Acetyldaidzin	Flavonoids	Isoflavonoids	272802	516466	346769	486398	220686	1	200519	1	261855	357101	1	425948	(458.79294, 2700.4001)(460.127, 795.77)(462.12576, 3476.95)(441.11328, 7500.627)(442.1174, 726.0967)(443.792, 4007.9631)(444.62756, 9500.73)(445.62625, 11157.11)(446.1286, 4068.53)(459.72656, 3921.914)(461.80115, 2983.6833)(462.1355, 245.64)(464.1471, 5373.16)(442.45547, 11072.884)(443.45303, 2536.3467)(447.1362, 5632.6445)(499.07925, 6257.79)(500.08258, 6438.855)(501.0834, 1300.51)(481.0867, 718…
6''-O-Acetylgenistin	Flavonoids	Isoflavonoids	462591	281285	365526	288027	1	213580	1	1	194200	283550	2055558	1830429	(475.12796, 10961.998)(476.12857, 1835.0625)(478.45532, 7071.737)(479.79758, 1460.1866)(459.11536, 15658.79)(461.7872, 1851.2067)(480.1449, 4460.535)(480.1418, 798.14)(481.1459, 4713.71)(457.31308, 13555.451)(458.86395, 3160.1702)(460.4419, 1289.0533)(514.08624, 4690.93)(514.0923, 704.87)(496.47626, 2932.106)(498.41055, 1417.2266)(499.7457, 4860.067)(499.1149, 2602.8926)(482.4996, 3412.816)(484.3…
6''-O-Malonyldaidzin	Flavonoids	Isoflavonoids	945033	996286	1104782	687534	763072	741937	485194	468825	493742	1	154386	1	(485.1065, 25147.238)(486.10712, 9418.21)(487.10504, 5964.46)(488.10492, 1263.1289)(489.1033, 415.72498)
6''-O-Acetylglycitin	Flavonoids	Isoflavonoids	175628	308250	362731	122535	109753	192860	365293	194335	352676	1	486551	1	(490.6402, 7248.21)(494.1361, 1363.27)(470.8649, 5993.5674)(472.12085, 2277.7666)(473.12622, 7810.6562)(474.1377, 3900.1233)(475.141, 10221.453)(476.13797, 1411.25)(492.3132, 7082.643)(492.65414, 295.915)(475.12994, 3253.365)(476.13184, 372.765)(477.1392, 260.97)(528.09845, 991.088)(532.6057, 2041.98)(512.9504, 3593.3726)(513.7595, 2046.3232)(515.09845, 3621.0166)(512.5239, 1857.876)(514.1212, 21…
6''-O-Malonylgenistin	Flavonoids	Isoflavonoids	1034878	808972	757543	278602	220740	1	165656	203815	187673	1	1	1	(522.2864, 1369.8467)(523.11835, 708.44)(506.117, 141.81)(524.1125, 1144.19)(501.44568, 1001.09503)(557.0794, 1161.06)(542.488, 1232.4114)(542.1047, 4348.188)(544.111, 315.43)(525.52374, 4619.856)(526.7014, 1030.396)(528.6127, 1847.2524)
6''-O-Malonylglycitin	Flavonoids	Isoflavonoids	775651	625336	558852	966426	887397	636438	485433	532180	1	223273	179092	188703	(534.62823, 484.81503)(515.1126, 3181.2917)(517.31635, 2661.742)(518.1243, 115.22)(535.9415, 25430.693)(536.1474, 10566.0)(537.147, 5049.607)(538.1457, 453.22998)(518.12885, 36399.145)(518.13226, 19402.033)(519.1324, 5630.223)(572.9104, 785.6209)(554.36456, 2994.227)(557.0918, 3469.805)(559.0984, 11119.51)(556.283, 1022.1767)(560.46063, 2669.0566)(561.1251, 2982.19)(538.4765, 1565.1571)(540.8258,…
Butein / Naringenin	Flavonoids	Chalcones	645726	692967	546942	1	1	1	663392	693053	660371	491404	539977	480824	(274.0803, 7404.9062)(276.0844, 744.96)(255.46436, 4868.88)(256.81412, 10100.005)(258.3178, 2603.0874)(258.56946, 3003.695)(259.0679, 4839.46)(273.67798, 19889.508)(274.32867, 3719.1826)(311.03342, 21930.838)(312.03598, 2599.7932)(293.0228, 529.03)(296.63068, 2375.477)(298.06317, 992.54663)(277.04993, 14888.84)(278.05176, 2137.07)(279.0444, 239.26)
Xanthohumol / Isoxanthohumol	Flavonoids	Chalcones	1	5884081	5164404	16910072	159433296	107104848	161791328	17765984	171097984	157597536	165020848	16430855	(356.40378, 9107.8125)(358.1624, 3084.2852)(337.53925, 1702.8782)(339.1366, 18561.16)(340.1526, 3221.39)(357.90942, 43940.1)(358.9169, 6115.82)(360.15878, 1663.6401)(337.64835, 6440.9854)(338.14917, 2972.95)(394.31387, 1480.812)(375.7304, 3707108.8)(376.10718, 856064.3)(377.10928, 147295.52)(378.1096, 29291.69)(378.73718, 3836.6238)(379.81485, 1051.4384)(381.15625, 526.9)(362.73676, 1772.708)(363…
Phloretin	Flavonoids	Dihydrochalcones	1014823	1518267	910813	1349170	2574300	1	2143300	999200	2264809	1017324	913686	1220199	(274.68677, 3868.6536)(275.84164, 1659.0425)(279.1005, 2552.03)(256.18704, 7326.613)(257.27478, 1730.652)(258.57837, 2693.99)(260.0845, 571.92)(261.0853, 97965.7)(275.69888, 2623.2778)(276.59775, 6292.255)(257.58264, 8827.506)(258.4809, 1071.444)(260.08472, 3241.435)(316.17828, 1441.9524)(317.05103, 1923.3201)(319.0641, 377.41)(299.2082, 971.84)(300.45007, 1076.694)(301.04227, 1054.3134)(298.2779…
Phloridzin	Flavonoids	Dihydrochalcones	1	726082	338918	482438	1	510811	251184	295368	371051	978644	993089	914296	(437.28238, 10083.514)(438.14124, 4128.0435)(418.46008, 3878.3232)(438.8169, 9422.537)(440.40607, 2556.9248)(441.15915, 19449.516)(419.35458, 9248.455)(420.53418, 2901.2358)(421.1317, 234.65)(478.44083, 930.38666)(459.0832, 332.495)(460.33408, 6802.466)(461.8058, 1855.11)(463.1434, 10676.02)(464.1352, 224.33)(465.1328, 1392.12)(442.00473, 4257.4355)(445.4591, 4231.9863)
3-Hydroxyphloretin 2'-O-glucoside / (+)-Catechin 3-O-glucose	Flavonoids	Dihydrochalcones	1019476	918253	575020	268964	908411	941746	162124	1438201	1231518	1221278	878329	930104	(452.8494, 5174.771)(454.14377, 3133.1902)(455.80713, 5713.733)(457.1406, 3795.57)(458.13776, 13392.38)(435.68262, 7152.8477)(436.62997, 4424.9917)(438.13144, 2283.2651)(438.1278, 1608.39)(455.7461, 5634.368)(454.1489, 2875.98)(439.13293, 4757.875)(440.1352, 584.26)(441.14093, 5484.895)(492.59857, 3184.1948)(493.43774, 934.86993)(473.58316, 545.92505)(475.0804, 255.28)(475.126, 7482.067)(476.1296…
Phloretin 2'-O-xylosyl-glucoside	Flavonoids	Dihydrochalcones	663574	677505	622482	1335102	1	916585	559024	616704	352759	1	1663528	784159	(568.6649, 646.70996)(552.8515, 1588.7699)(553.1851, 129.96)(571.9933, 4949.551)(570.2163, 169.57)(554.8992, 1781.5543)(556.1826, 1018.888)(607.9474, 18313.578)(608.9513, 5380.8843)(613.1638, 3678.56)(589.1309, 2587.4082)(593.9704, 10766.533)(594.4259, 2317.8723)(593.18024, 451.43)(575.9636, 5200.669)(578.177, 2571.2183)(579.17377, 15856.278)
3-Hydroxyphloretin 2'-O-xylosyl-glucoside	Flavonoids	Dihydrochalcones	1	12964622	12462639	1278269	1370186	20193844	4110872	461283	257331	753506	17960054	19271156	(585.9833, 1736.0221)(589.51587, 7749.8696)(590.18695, 2553.87)(566.1544, 254697.62)(567.15515, 79089.81)(568.1589, 13741.344)(569.165, 1203.1074)(589.18506, 7338.683)(590.52747, 5450.6665)(591.19806, 63529.098)(568.67444, 965.29004)(572.17737, 3649.53)(573.1878, 7391.9)(605.11755, 11227.3125)(606.1212, 3348.2002)(607.135, 1810.38)(609.4286, 3537.491)(608.1784, 3743.55)(593.3891, 14903.779)(595.1…
Dihydroquercetin	Flavonoids	Dihydroflavonols	1854498	1840828	1882898	2345047	2103126	2071030	14897738	1	16692917	33318948	34241604	33280420	(305.17245, 2167.9011)(287.72263, 138288.81)(288.0558, 66723.41)(305.0633, 520.08)(288.77045, 462915.66)(288.857, 101759.87)(289.06174, 4584.243)(325.0088, 2638.6099)(327.33493, 18209.592)(328.05087, 3697.0586)(309.03632, 21005.855)(310.0401, 2621.992)(311.0357, 517.89)
Dihydroquercetin 3-O-rhamnoside / Eriodictyol 7-O-glucoside	Flavonoids	Dihydroflavonols	1462257	1585600	1518497	4109628	4078446	3988749	3649398	4096129	3453016	5477065	5542421	5422859	(450.9578, 1770.9615)(451.45126, 967.67)(452.12646, 259.66)(433.10886, 120187.1)(434.1128, 27701.889)(435.11865, 6165.787)(436.1366, 1052.65)(474.74368, 384.78003)(476.4148, 1404.96)(477.0827, 1927.85)(479.1339, 162.49)(456.2644, 1919.9708)(461.1052, 229.755)
Dihydromyricetin 3-O-rhamnoside	Flavonoids	Dihydroflavonols	1	417414	406391	852619	806273	751008	823526	839384	786947	1410877	1414945	1341572	(469.11426, 8323.654)(470.12634, 4906.355)(471.1236, 272.485)(472.1326, 180.89)(448.7748, 9234.967)(450.1132, 2127.525)(451.1078, 176.65)(472.30737, 3183.1165)(472.1445, 1417.64)(449.10394, 28929.836)(450.1094, 6282.1343)(451.11258, 635.37775)(493.7789, 335.07666)(494.0993, 142.7)(477.10123, 2278.1667)
Kaempferide	Flavonoids	Flavonols	1241121	1306559	1247489	3482740	2967129	2943012	2311733	2300825	2253905	576872	608618	559693	(300.89127, 3855.7585)(301.55878, 2770.7524)(281.0477, 13907.7)(282.05066, 4096.1426)(283.06104, 312.53)(302.06833, 2752.8665)(282.54904, 39802.195)(283.04688, 7927.6406)(339.02524, 608.00665)(324.8831, 7495.092)(324.8082, 4724.5586)(325.6524, 1063.608)(327.0487, 147.65)(307.4874, 13335.846)(308.42227, 6501.665)(309.0544, 17587.98)
6,8-Dihydroxykaempferol / Myricetin	Flavonoids	Flavonols	555593	341629	526719	611473	616102	682773	547451	565125	678436	1167547	1015180	998310	(320.29587, 1012.9275)(321.0518, 103.05)(323.0567, 1102.33)(303.0284, 30221.477)(304.02975, 5907.8364)(322.22678, 2357.3035)(303.78857, 12623.673)(304.04315, 1841.2556)(305.54794, 236.13667)(357.50995, 3142.155)(340.99042, 2218.3)(341.0341, 6701.3804)(342.03677, 1881.1133)(324.3995, 2547.376)(325.0164, 671.37)
Kaempferol 3-O-rhamnoside	Flavonoids	Flavonols	1	1669665	1901911	532729	570896	537907	166247	176426	157994	1	491714	1	(432.43982, 33474.707)(433.30893, 13244.977)(435.1152, 1019.31)(413.0811, 11675.212)(414.0965, 191.31)(433.1156, 12284.95)(434.1189, 6426.32)(415.48264, 9112.141)(417.77786, 10752.41)(472.92487, 723.26855)(474.82962, 1007.61)(475.0814, 816.09)(454.20743, 4563.8984)(456.6664, 10192.322)(458.0709, 2497.75)(454.43118, 696.1867)(436.93747, 17171.637)(438.08585, 3763.6418)
3-Methoxynobiletin	Flavonoids	Flavonols	2239070	3377014	3191502	755350	774064	258434	690441	860495	938924	1683767	1782899	1514704	(432.71368, 9036.147)(434.1444, 8592.855)(435.1507, 6914.3003)(436.1635, 2392.27)(414.30188, 2130.28)(417.1455, 7598.04)(419.1387, 7683.01)(434.27475, 11455.748)(435.75156, 4720.93)(439.1724, 7984.88)(416.58777, 7929.685)(417.48184, 1329.25)(419.65955, 2726.145)(420.1438, 2124.79)(473.10815, 2020.53)(454.29486, 26459.062)(454.1001, 7745.8145)(455.0969, 1039.3025)(456.31915, 3343.5818)(458.8664, 2…
Quercetin 3-O-arabinoside / Quercetin 3-O-xyloside	Flavonoids	Flavonols	2397363	1	1643049	1	260482	241814	214578	1	200595	829239	825409	808797	(435.36557, 13027.144)(436.92453, 3508.9465)(438.29794, 9451.724)(438.76724, 15433.887)(439.1008, 10722.55)(418.83295, 3276.825)(418.077, 2006.98)(419.0736, 2602.48)(421.0807, 726.49)(437.10706, 2302.285)(438.10025, 11555.939)(439.10254, 5077.525)(419.9493, 3615.7986)(476.64386, 1575.518)(478.55634, 467.665)(479.0603, 447.85)(456.44717, 3073.488)(457.7972, 595.63257)(459.04578, 1104.325)(460.5897…
Kaempferol 7-O-glucoside	Flavonoids	Flavonols	1182985	923879	1008504	447812	372068	1	407078	419967	441766	1	677756	1	(447.09656, 3864.428)(448.0951, 1529.14)(449.08716, 474.33667)(429.07776, 1574.6713)(430.0752, 582.48)(450.71356, 161.154)(451.36234, 419.12997)(452.11887, 1685.02)(432.8759, 1052.0933)(433.50146, 475.852)(434.60773, 1376.6726)(435.10385, 1232.825)(487.3009, 871.58997)(470.05615, 1891.6134)(471.0486, 113.24)(473.09085, 957.0999)(476.095, 231.76)(453.07343, 1653.245)(455.0787, 615.00165)(454.06876…
Myricetin 3-O-arabinoside	Flavonoids	Flavonols	645467	404077	257854	917703	925549	652720	379009	390151	396340	192986	269672	188331	(451.58667, 5002.1143)(452.97812, 4160.239)(453.84424, 960.77246)(455.105, 419.81)(433.73508, 949.6433)(435.0671, 4118.99)(436.0812, 2712.79)(434.80936, 2150.5537)(436.1986, 5813.549)(437.2339, 5593.5283)(437.58636, 10516.63)(438.0846, 4048.95)(492.4738, 2130.0557)(495.04388, 1447.875)(473.23438, 1090.672)(473.53156, 384.66998)(474.0307, 1362.47)(475.25388, 709.4282)(475.0822, 1090.9)(476.086, 45…
Myricetin 3-O-rhamnoside / Quercetin 3-O-galactoside / Quercetin 4'-O-glucoside / Quercetin 3-O-glucoside	Flavonoids	Flavonols	81403	824556	958564	551215	390110	334492	816052	267984	779220	4935747	3446237	4510137	(465.59674, 49904.34)(466.49847, 20079.379)(467.59506, 7854.93)(468.0981, 2131.5767)(446.08252, 3953.335)(466.61206, 8054.59)(467.3139, 3357.4282)(468.11108, 1146.34)(447.84897, 49198.465)(449.30194, 18125.656)(451.10196, 9234.373)(505.0602, 1269.9814)(509.06738, 1748.375)(487.05066, 827.1133)(487.8792, 22842.762)(488.08435, 7954.017)(471.7032, 2293.4375)(472.67072, 2826.2)(475.0809, 1680.0249)
Kaempferol 3-O-acetyl-glucoside / Quercetin 3-O-acetyl-rhamnoside	Flavonoids	Flavonols	241671	262325	728525	2049420	1	2547799	3272194	1	13261513	1041056	2462347	5792853	(472.102, 14537.311)(492.52838, 2179.2058)(496.1198, 142.89)(497.1207, 78.72)(474.3043, 17416.787)(475.4362, 5597.9316)(476.7068, 6903.8057)(531.75287, 5711.09)(534.0943, 83.89)(512.5582, 1132.1825)(516.0823, 20.43)(513.1011, 5230.63)(514.10345, 370.1067)(495.08588, 665.2075)
Isorhamnetin 3-O-glucoside / Isorhamnetin 7-O-rhamnoside	Flavonoids	Flavonols	1	1	1	1	1	1	1381745	1217166	926155	7713316	6559289	7496852	(480.1162, 18276.65)(480.1185, 8206.965)(481.1223, 1586.505)(465.60486, 4214.49)(466.115, 846.77)(479.1136, 146906.77)(480.11722, 34994.86)(481.121, 8001.91)(482.12875, 669.4766)(463.45193, 7330.47)(463.11975, 823.63)(465.1291, 2800.95)(466.1217, 1510.89)(501.1054, 14355.275)(502.11035, 5069.29)(485.09964, 2236.47)(486.0995, 345.47)
Myricetin 3-O-glucoside	Flavonoids	Flavonols	298241	82722	95943	673399	466819	259516	96915	108790	1	578739	441216	541305	(480.8148, 2411.9316)(483.09967, 4139.485)(485.1001, 306.78)(463.91516, 1949.7484)(466.7567, 2932.28)(467.09174, 3199.115)(482.76193, 23286.812)(484.29843, 11758.446)(485.2938, 6704.78)(466.26376, 50473.49)(466.59964, 17484.438)(467.59277, 8047.082)(468.0981, 2127.2302)(521.92316, 2458.694)(523.2271, 1236.1366)(523.0659, 1051.73)(502.6166, 1388.6229)(507.06018, 714.04004)(504.38837, 4153.5205)(50…
Quercetin 3-O-glucuronide	Flavonoids	Flavonols	194532	1	301687	115289	139430	145184	115249	1	107906	1	151456	160474	(481.09494, 1620.9102)(483.09338, 7990.0747)(484.0954, 475.85)(463.0627, 2317.71)(483.67358, 14873.329)(484.34735, 1962.8225)(485.1066, 4335.135)(463.7389, 8146.223)(465.08008, 3716.05)(466.0871, 6629.63)(521.034, 4113.285)(523.0484, 4688.675)(502.5411, 1737.2999)(502.07397, 5027.4614)(504.40866, 2636.25)(486.39465, 3156.6301)(487.0581, 2106.08)
Myricetin 3-O-galactoside	Flavonoids	Flavonols	1	82722	95943	1	1	1	1	1	1	1	1	1	(485.10635, 55764.055)(486.1069, 23520.395)(487.10474, 15780.675)(503.07825, 5653.7)(504.07837, 1267.685)
Isorhamnetin 3-O-glucuronide	Flavonoids	Flavonols	399541	338389	231521	342570	737785	244188	154138	124803	114161	643968	217142	205762	(495.09906, 173853.03)(495.85327, 72317.95)(497.11264, 22189.928)(498.1198, 3866.35)(475.58804, 3061.4375)(477.08932, 1958.6)(478.0915, 2063.185)(495.87857, 835.89)(497.1118, 794.19)(478.9001, 730.57)(480.10107, 2071.1667)(481.1144, 2749.16)(535.56354, 5870.1343)(535.06586, 3096.204)(536.5667, 6263.4253)(537.0571, 1733.4)(514.3867, 341.24664)(518.0891, 1762.8345)(521.0922, 1115.93)(498.401, 8231.…
5,3',4'-Trihydroxy-3-methoxy-6:7-methylenedioxyflavone 4'-O-glucuronide	Flavonoids	Flavonols	227291	173177	200910	695862	246803	513027	184083	168199	226323	384952	366111	365934	(523.09106, 4512.4673)(525.0959, 2051.8567)(525.0895, 2579.47)(526.1015, 554.95)(502.08032, 4055.905)(522.59644, 1758.905)(523.59143, 3125.64)(503.0827, 3436.3188)(504.07837, 1604.88)(565.05273, 204.625)(542.706, 2306.617)(545.0845, 343.72)(549.0907, 179.83)(525.061, 1186.21)
Jaceidin 4'-O-glucuronide	Flavonoids	Flavonols	581813	211452	432256	308282	190015	109313	425688	452515	454673	539428	518648	576437	(540.1294, 9060.939)(541.129, 3039.159)(539.12, 6156.425)(540.1184, 494.60498)(521.1259, 1767.2)(522.1284, 140.46)(539.1321, 6075.6133)(542.1311, 4520.51)(521.11975, 2023.8799)(579.088, 8512.996)(580.0921, 1437.006)(581.0874, 586.41)(561.0274, 16653.234)(562.3798, 4348.725)(563.1115, 2370.6443)(542.3046, 3734.9297)(544.1133, 302.78)
Quercetin 3-O-glucosyl-xyloside	Flavonoids	Flavonols	93147	793136	1	266265	308212	518159	219074	205489	223157	258550	904229	221606	(600.138, 955.54004)(602.7529, 1695.25)(585.1366, 427.8)(635.1118, 591.195)(617.09, 8570.66)(618.0942, 1365.3766)(619.80054, 7575.5337)(601.3302, 2815.8218)(602.11707, 1588.41)
Quercetin 3-O-rutinoside / Quercetin 3-O-galactoside 7-O-rhamnoside / Quercetin 3-O-rhamnosyl-galactoside	Flavonoids	Flavonols	1508465	1733596	1830822	1388848	1141445	1536726	1	1	1	780672	1344866	685799	(611.1578, 22426.17)(612.1598, 5926.8)(595.163, 6933.47)(611.1559, 33359.984)(612.1591, 9185.439)(613.1715, 1919.5)(595.1614, 25359.215)(596.16675, 8274.025)(597.1603, 590.32996)(649.1156, 18485.44)(650.1164, 9829.118)(633.1398, 26258.996)(634.14154, 13275.477)(635.12756, 1606.7849)
Quercetin 3-O-xylosyl-glucuronide	Flavonoids	Flavonols	111069	123602	126884	428163	136895	106336	146742	130304	109375	219053	156842	194557	(615.12024, 4072.04)(616.121, 276.06)(592.10974, 3622.9365)(615.1216, 2118.2852)(617.1263, 2541.74)(593.1281, 3838.2302)(594.1384, 499.47)(653.10156, 1502.6699)(635.3364, 1642.8489)
Isorhamnetin 3-O-glucoside 7-O-rhamnoside	Flavonoids	Flavonols	1	1	89956	136260	1	108901	562375	554045	328751	947063	669127	687595	(625.1716, 7636.1724)(626.3204, 1594.637)(627.1952, 530.1)(607.1485, 4826.178)(609.95654, 2350.972)(611.1609, 2528.605)(631.18475, 4954.0)(607.1824, 2393.41)(647.16, 6976.945)
Quercetin 3-O-sophoroside / Quercetin 3,4'-O-diglucoside / Quercetin 7,4'-O-diglucoside	Flavonoids	Flavonols	284696	962219	139610	891718	955984	922923	835151	846275	777853	146521	161623	275791	(627.1497, 9558.601)(628.1539, 1759.3134)(611.1586, 2880.0667)(630.806, 3657.449)(628.17377, 4040.4102)(649.1161, 15393.456)(650.1166, 7928.7812)(651.1147, 6988.339)(652.1151, 2202.263)(653.1137, 639.19995)(633.1424, 30287.715)(634.1429, 17723.998)(635.1408, 12774.146)(636.1409, 4136.887)(637.13965, 906.94574)
Kaempferol 3-O-(6''-acetyl-galactoside) 7-O-rhamnoside	Flavonoids	Flavonols	125053	134829	1	1298888	1419261	1	1469684	1522337	1123861	441164	321335	2554923	(637.18506, 3200.645)(638.18604, 240.84999)(641.1697, 4300.3047)(642.17, 777.21)(619.1563, 7565.6797)(620.1605, 976.73004)(623.93, 1467.6151)(663.1476, 795.6225)(663.15045, 914.435)(641.16473, 32999.695)(642.16876, 10138.141)(643.1716, 2363.2317)
Quercetin 3-O-(6''-acetyl-galactoside) 7-O-rhamnoside	Flavonoids	Flavonols	1	1	1	158545	165527	230958	1276320	218531	208925	1006930	1528454	1012577	(653.1675, 9871.68)(654.1727, 2224.44)(639.1808, 9690.37)(640.1846, 1626.395)(691.1269, 30636.0)(692.125, 13014.677)(693.12756, 2363.2476)(677.1606, 7978.654)(678.16547, 1802.3267)
Spinacetin 3-O-glucosyl-(1-6)-glucoside	Flavonoids	Flavonols	75032	519726	509461	172085	196410	268355	241287	242824	234607	121540	108239	118808	(672.18787, 3074.63)(674.51886, 2972.5266)(674.67487, 2304.64)(653.16724, 9734.304)(654.1724, 2172.5266)(672.1752, 1830.615)(675.17786, 8472.225)(676.17957, 2230.065)(710.48834, 6528.89)(711.15735, 3239.3901)(691.1478, 3833.71)(696.17017, 3728.2651)(697.1718, 987.11)(676.4958, 5772.39)(678.165, 1877.8174)
Kaempferol 3-O-glucosyl-rhamnosyl-glucoside / Quercetin 3-O-rhamnosyl-rhamnosyl-glucoside	Flavonoids	Flavonols	146080	142414	141192	494733	406795	455419	1895618	1947654	1978590	894810	1992833	878470	(739.1907, 20650.22)(740.1943, 8003.37)(741.196, 1678.65)(739.1917, 56051.766)(740.19476, 22181.023)(741.19684, 5466.0117)(742.1997, 599.48)(779.5643, 20426.941)(782.1792, 23795.088)(783.17725, 19909.414)(784.17694, 9084.953)(779.2214, 7438.36)(780.2197, 2650.0498)(761.17126, 3285.895)(762.1753, 1672.9775)
Rhoifolin 4'-O-glucoside / Kaempferol 3-O-(2''-rhamnosyl-galactoside) 7-O-rhamnoside / Kaempferol 3-O-rhamnosyl-rhamnosyl-glucoside / Kaempferol 3-O-xylosyl-rutinoside	Flavonoids	Flavonols	1	1	1	169999	1	150833	736953	757263	741953	265368	776603	290740	(740.1948, 25411.148)(741.19696, 6391.858)(742.1997, 632.27)(723.2202, 2219.545)(724.2038, 2963.46)(742.2331, 3738.6948)(744.2196, 2125.125)(761.1719, 3807.0469)(762.1753, 1762.3425)(768.54565, 2612.8264)
Kaempferol 3-O-sophoroside 7-O-glucoside / Kaempferol 3,7,4'-O-triglucoside	Flavonoids	Flavonols	563618	407537	450469	353288	565640	339235	354748	258598	572480	477179	562026	419365	(776.22296, 25282.758)(777.2238, 18388.709)(778.222, 14876.574)(779.22174, 6228.488)(797.15186, 12523.897)(798.15247, 11257.322)(799.1507, 10370.691)(800.1507, 4569.685)(781.1796, 24448.555)(782.17944, 17282.441)(783.17786, 16280.526)
Kaempferol 3-O-glucosyl-rhamnosyl-galactoside	Flavonoids	Flavonols	146080	142414	141192	1	1	1	1	1	1	1	1	1	(781.1785, 33702.277)(782.1792, 23795.088)(783.17725, 19909.414)(784.17694, 9084.953)(779.2214, 7438.36)(780.2197, 2650.0498)
Quercetin 3-O-xylosyl-rutinoside	Flavonoids	Flavonols	846138	944905	979933	1	1012206	1010479	1096717	1006578	1007527	165929	1	154715	(781.2792, 24310.725)(782.2791, 17218.074)(784.1777, 859.29)
Kaempferol 3-O-(2''-rhamnosyl-6''-acetyl-galactoside) 7-O-rhamnoside	Flavonoids	Flavonols	1	1	1	1	1	1	385668	409090	238932	104253	104754	250995	(785.1965, 9921.15)(786.1994, 3029.8674)(791.1934, 1334.0133)(792.87177, 419.6333)(793.2098, 1292.67)
Spinacetin 3-O-glucosyl-(1-6)-[apiosyl(1-2)]-glucoside	Flavonoids	Flavonols	190269	188547	229226	273755	265528	251622	648431	289384	273890	230651	440081	283689	(948.22925, 8721.46)(1000.4194, 8679.238)(1001.5065, 7183.549)(1005.2328, 6189.482)(1006.23083, 3279.272)(1001.2711, 10505.597)(1002.27325, 3994.5308)(1015.99457, 2561.2156)(1020.2118, 3019.2612)(1021.2065, 2706.3782)(1022.20886, 1419.706)(952.2841, 320.72)(985.61346, 2436.4272)
Anhydro-secoisolariciresinol	Lignans	Lignans	2301899	1	2334051	3614027	1966520	1	3462337	4690258	2511119	2435948	2106568	2853209	(345.4137, 3987.2175)(347.92065, 4731.3975)(348.1716, 249.875)(326.64856, 6837.575)(329.4063, 7735.8076)(330.1662, 5058.5234)(330.6677, 4639.38)(331.1581, 6207.31)(346.17377, 4780.7256)(348.84335, 7547.4966)(349.1777, 15413.0)(328.8752, 4948.7866)(330.49823, 7740.611)(383.92645, 13788.783)(385.24326, 6438.48)(387.1338, 1914.7267)(389.1387, 2533.725)(365.517, 5450.229)(366.1213, 3187.805)(367.1106…
Conidendrin	Lignans	Lignans	1	841032	1297344	5039279	5372121	3589603	1	2703923	1293308	1394465	1409420	1593108	(356.68243, 24540.303)(358.3352, 11368.572)(359.64163, 2009.475)(361.1488, 1086.83)(338.9211, 17661.344)(340.12357, 3929.675)(341.12753, 6020.763)(342.46606, 1674.3368)(343.12756, 2099.315)(357.12994, 50329.38)(358.1363, 10332.42)(359.13586, 3183.8298)(339.5245, 36960.594)(340.52475, 7290.556)(398.60007, 1492.6099)(378.58545, 1766.9175)(380.24622, 645.475)(380.45078, 469.81665)(362.30695, 5063.23…
Episesamin / Sesamin	Lignans	Lignans	1	1	1	1681890	1375037	3251114	8961480	8645665	9229155	1	1	1	(357.1235, 133.87)(337.9027, 4436.2397)(338.61, 802.97253)(339.6079, 1140.24)(340.11136, 9354.667)(341.11182, 2750.8933)(355.69214, 14699.515)(356.11868, 5116.78)(341.1278, 3202.55)(393.82828, 10432.678)(395.08203, 844.27325)(397.08557, 676076.6)(398.0886, 134506.67)(399.0909, 22441.271)(379.0685, 148.41)(378.61218, 89077.19)(378.10587, 30994.143)(379.1109, 2816.5151)(361.23413, 17213.67)(362.243…
Matairesinol / Pinoresinol	Lignans	Lignans	2234388	974377	866548	4589823	4027371	3105473	2461436	2646781	1767570	2256235	9053801	2337820	(358.85938, 1955.4401)(362.1518, 12254.074)(340.68106, 2056.2654)(342.6382, 3662.3987)(343.80606, 4458.773)(344.54126, 4940.8296)(345.14795, 4052.83)(359.9281, 7300.099)(361.15436, 7039.097)(362.1493, 9974.32)(341.1441, 20681.91)(342.14493, 4851.4346)(343.1331, 130.63)(398.98465, 2545.8225)(400.50754, 3193.074)(401.61255, 1261.635)(403.11346, 574.36)(379.761, 33888.766)(380.09576, 6605.7036)(381.…
Isolariciresinol / Cyclolariciresinol / Lariciresinol	Lignans	Lignans	1	1	1	10962182	10021936	10012929	6404729	6196025	6307014	3111555	3306431	3244352	(360.58975, 6607.022)(361.91113, 1956.635)(363.16122, 7083.187)(364.1776, 1108.59)(342.4861, 5419.0967)(345.14645, 217.63501)(345.1519, 1006.41)(361.16144, 10659.49)(362.17026, 2045.71)(343.15088, 8803.347)(344.14798, 1692.0865)(401.12048, 7911.4287)(401.92145, 2755.392)(403.12442, 2187.21)(384.4547, 1559.1099)(383.28958, 31442.463)(384.2899, 6496.9873)(385.3982, 820.7425)(365.81006, 6568.5767)(3…
Secoisolariciresinol	Lignans	Lignans	11945879	14199821	14720674	6531640	5662221	5731008	2202516	2310628	2738521	2671886	4767321	1460700	(362.5085, 3819.9722)(364.42828, 5254.843)(365.1823, 223.52)(345.05408, 3825.2842)(346.17175, 1520.1732)(347.1735, 1060.42)(348.6764, 2312.5151)(349.1825, 3683.19)(363.93076, 4610.7456)(366.18408, 5509.7627)(367.1976, 1560.58)(346.67316, 3764.3225)(348.34338, 8503.144)(349.18042, 4163.342)(349.67474, 4448.165)(350.1916, 12222.24)(402.68262, 21536.037)(403.54022, 12419.061)(405.40118, 4304.0)(405.…
Episesaminol / Sesaminol / Sesamolin	Lignans	Lignans	1	345875	352387	2295076	1059639	1172396	1055154	1430732	1842500	2636618	2202481	2265418	(371.4766, 10144.517)(372.25186, 5761.0063)(373.31598, 3373.246)(352.7639, 439.19336)(353.0953, 92.47)(372.1173, 586.325)(353.99295, 3093.561)(355.44055, 962.6967)(356.44174, 2037.3434)(358.1095, 513.28)(410.8993, 2091.8135)(412.39917, 357.96335)(415.0881, 829.73)(392.55667, 1354.7217)(395.728, 5799.623)(397.058, 18401.36)(393.36682, 3864.0327)(394.2928, 27119.574)(396.095, 18643.33)(376.82108, 4…
Arctigenin	Lignans	Lignans	5574544	5483486	2965725	6425183	4642503	5009253	8244435	8342189	8766374	6313071	7341941	8777626	(372.35516, 8852.892)(374.16132, 3019.325)(375.1706, 7374.76)(377.1646, 1940.98)(355.00433, 10278.524)(356.34647, 4380.116)(373.91492, 10294.116)(375.92047, 2798.7126)(356.53766, 14311.079)(358.28827, 1563.9636)(359.83774, 210.53333)(360.1661, 3494.1)(413.52042, 8104.0264)(415.01108, 2817.969)(416.29575, 14369.234)(416.46362, 4437.67)(417.1336, 8769.16)(393.1121, 1992.7723)(394.11685, 992.69)(395…
7-Oxomatairesinol / Sesamolinol	Lignans	Lignans	1094174	1574053	479044	1	1370479	1407087	1694086	1676376	1847930	4536776	4257604	4818630	(373.12415, 1631.79)(375.633, 2355.3901)(376.1418, 335.62)(354.10855, 1823.7749)(373.6317, 11075.275)(374.13504, 1998.4)(356.45633, 22413.086)(356.1187, 8244.626)(411.7532, 1558.8267)(394.7903, 3281.9316)(397.0734, 2574.0432)(398.0793, 190.66)(398.12296, 1517.085)(379.73468, 6079.725)(381.114, 15296.009)(382.1159, 6873.22)
7-Hydroxysecoisolariciresinol	Lignans	Lignans	812440	1	384845	997018	493652	1	4758406	1	1	1151788	906328	2183543	(374.64334, 11269.485)(375.96194, 5800.682)(356.628, 2180.4155)(358.54184, 9839.626)(360.20758, 3091.0498)(361.2186, 14225.44)(375.41522, 4933.616)(376.54688, 4054.3467)(378.2247, 3368.98)(358.206, 37396.645)(359.95844, 14008.595)(360.55106, 5123.8066)(361.72055, 2025.155)(362.213, 290.08)(414.0542, 10224.2)(414.77325, 2947.7937)(418.1699, 1836.91)(419.1726, 3878.41)(395.28854, 5958.801)(396.3691…
7-Hydroxymatairesinol / Isohydroxymatairesinol / Nortrachelogenin	Lignans	Lignans	2044316	1484477	1441442	1	1689970	7593022	4498710	1	4661365	1286639	4920689	1184765	(375.80807, 8646.6875)(376.34674, 4603.8145)(377.35114, 9689.102)(378.1565, 4580.56)(356.12167, 1328.2816)(376.1464, 490.32666)(358.24564, 20112.506)(359.36493, 5463.413)(360.647, 4275.915)(413.09808, 1921.2529)(414.0939, 109.899994)(396.6631, 35085.984)(396.89404, 6518.232)(397.0853, 7777.957)(398.09296, 211.64499)(397.79205, 22414.486)(399.0042, 5347.041)(379.61923, 724.45166)(383.13635, 6890.0…
Todolactol A	Lignans	Lignans	2119893	6761619	6371321	5423316	2536214	2873135	3263425	2985182	2858369	4208568	4115818	4165213	(376.70685, 5572.2295)(378.16287, 5753.7437)(379.15997, 4544.742)(381.1562, 2504.13)(358.71295, 5249.751)(360.1476, 3204.74)(361.1599, 8616.43)(362.1565, 1707.17)(363.1515, 8245.73)(377.8256, 7758.996)(378.96118, 3073.7239)(380.16855, 5479.1626)(381.16495, 12686.945)(359.90042, 12852.805)(360.65857, 6174.5425)(363.1577, 4468.22)(415.1151, 12222.316)(416.11847, 2917.2522)(401.3662, 15024.755)(402.…
Dimethylmatairesinol	Lignans	Lignans	838070	862445	1	3367919	2310538	2114121	2296643	9391350	8458502	5911072	2630343	5470255	(386.54816, 5947.117)(388.6819, 6161.79)(389.1759, 10855.93)(390.177, 2905.16)(391.1896, 9289.11)(369.49472, 31626.941)(371.96988, 25634.56)(372.97046, 17312.555)(373.167, 16020.1)(387.68463, 12799.201)(389.1853, 3473.9011)(391.1901, 4965.91)(392.1962, 10435.6)(370.0275, 11392.018)(372.50784, 8608.331)(373.3824, 4154.516)(374.1883, 19792.297)(427.68488, 20416.416)(428.14453, 5720.7993)(429.14584,…
Medioresinol / Trachelogenin	Lignans	Lignans	6713798	6918019	6051459	5610704	5748666	6371307	3758342	3076483	2461024	2166610	2724901	2948039	(388.4199, 2067.6956)(390.1667, 2244.4)(391.1677, 259.96)(370.13184, 1642.095)(390.16504, 4841.71)(390.16956, 975.745)(371.14856, 55611.97)(372.15475, 12175.406)(373.15042, 1851.31)(428.7207, 445.216)(433.13318, 771.485)(409.10013, 10232.053)(410.1026, 1658.13)(411.09515, 599.445)(412.44565, 1101.682)(414.152, 864.32996)(393.13034, 49816.074)(394.13455, 10576.372)
1-Acetoxypinoresinol	Lignans	Lignans	3566900	3564198	4113886	1736808	1424523	8684225	1	2694765	2015523	8523766	8890446	8806429	(416.6444, 24403.174)(418.1556, 13139.68)(419.1439, 3679.2)(398.1333, 13127.452)(417.15015, 21370.111)(418.15714, 5280.768)(419.16437, 1190.22)(399.13873, 89861.51)(400.1412, 19160.605)(455.10693, 100525.414)(456.11404, 28193.844)(438.6065, 5190.986)(439.35718, 1826.5625)(440.14194, 4732.562)(441.30978, 649.8516)(441.1419, 414.31)(421.45834, 2073.4036)
Syringaresinol	Lignans	Lignans	665542	1969849	1875922	2147453	1724952	1849701	2176903	573265	2243504	3038789	3326948	2999813	(418.16238, 3241.9673)(419.1641, 3976.68)(420.1615, 535.01)(400.14526, 12121.873)(401.14755, 2858.7)(420.06143, 1433.2278)(424.1889, 999.93)(401.5791, 9416.594)(402.59262, 4523.4614)(404.6624, 2915.665)(458.37823, 3509.4487)(459.63168, 1092.495)(461.1369, 2669.475)(439.77896, 3863.2136)(441.51587, 944.492)(443.1256, 4547.125)(441.69904, 24192.932)(442.5581, 5609.8076)(443.145, 1772.34)(444.143, 1…
Lariciresinol-sesquilignan	Lignans	Lignans	3237207	2842820	2560742	1139910	1531147	1390632	2634502	2541664	1	7011805	1046322	918764	(558.1116, 21198.863)(557.2308, 5628.7095)(540.1046, 5838.404)(542.37213, 13227.345)(543.5662, 8885.105)(543.73267, 16254.425)(544.2342, 7850.46)(560.6577, 40297.31)(562.4539, 11979.326)(560.2405, 1064.52)(541.07684, 2282.1118)(543.8941, 6474.76)(544.9084, 37702.934)(545.2355, 517.02)(579.33075, 6190.7427)(579.436, 4474.387)(580.1822, 1464.86)(581.2339, 6196.3887)(582.8574, 2250.1702)(585.2306, 3…
Secoisolariciresinol-sesquilignan	Lignans	Lignans	1	551898	509983	2043576	2096248	1650859	1105915	1387053	1481972	1588920	2689092	1266314	(558.26086, 1297.2551)(563.80927, 8780.069)(563.2682, 891.64)(545.2625, 843.82666)(597.3048, 3520.3853)(599.2279, 776.38)(580.21826, 2750.2075)(581.23553, 45966.652)(582.2396, 16346.284)(583.2433, 8210.04)(584.2439, 304.27)(564.2422, 5254.763)(568.25476, 1968.675)
4-Vinylguaiacol / 3-Methoxyacetophenone	Other polyphenols	Alkylmethoxyphenols	1	1	1	1152067	1	811783	1024997	1443423	309403	2035519	286328	710459	(150.73576, 3785.4968)(133.059, 7946.34)(136.0718, 341.65)(151.57536, 9718.095)(133.49324, 13509.119)(134.06444, 1214.5641)(190.0324, 8139.6953)(172.02246, 7254.545)(177.0254, 1470.11)(174.56265, 10276.298)(176.86612, 1489.5221)(177.0649, 11989.81)(178.0699, 1833.37)(158.72734, 3200.923)
4-Ethylguaiacol	Other polyphenols	Alkylmethoxyphenols	1332453	1823048	1812348	737427	2844022	2327422	2703954	2556906	3035404	2542968	558472	2486796	(175.07397, 31674.205)(176.07706, 4518.051)(177.06876, 2160.785)(135.07901, 23390.082)(136.0808, 1406.1299)(152.33302, 730.9437)(157.0983, 55622.45)(193.38194, 2680.8833)(155.09312, 42352.453)(158.10214, 10339.508)(157.06697, 8121.2734)
4-Vinylsyringol	Other polyphenols	Alkylmethoxyphenols	4920619	4007046	4688341	316414	1115251	316535	4984714	4765762	50283742	343096	1	2613837	(243.0987, 42007.266)(243.81425, 7437.294)(244.10182, 345.97)(224.75325, 1672.1182)(226.4256, 24928.322)(228.5923, 1092.125)(244.43694, 18985.0)(246.78032, 16929.295)(225.66295, 7911.414)(227.43353, 16383.579)(230.1112, 3196.91)(281.915, 8476.482)(283.31006, 9858.638)(283.06293, 226.87666)(264.17093, 16081.014)(264.0586, 6553.33)(265.04944, 4522.29)(265.65536, 7213.6157)(267.5868, 4042.0322)(268.…
4-Vinylphenol	Other polyphenols	Alkylphenols	45441004	39984760	42709944	23849548	23458808	19972668	12293714	13835614	12183297	15631504	13404093	13297557	(102.41243, 43813.06)(145.8506, 53978.26)(147.02194, 57521.414)(145.55138, 6671.291)(146.80511, 2448.2288)(103.05316, 677931.6)(104.05661, 59389.86)(159.42105, 3584.6108)(160.02545, 283.94)(121.064, 2102.4402)(127.906136, 3752.4858)
4-Ethylphenol	Other polyphenols	Alkylphenols	1	1	1	11716987	10325118	10308232	13093852	15502268	14876160	20640000	21643884	18790924	(123.0788, 1258.36)(104.05988, 4488.531)(123.22291, 6630.336)(105.068825, 364421.44)(106.07206, 30923.207)(163.038, 110.07)(145.06375, 606.41705)
3-Methylcatechol / 4-Methylcatechol / Guaiacol	Other polyphenols	Alkylphenols	10648254	8360312	8637947	4978197	5342316	4933898	4586156	1608431	1918382	1	3646448	4870124	(124.5082, 5623.2114)(128.0625, 17457.227)(129.06798, 16198.041)(107.04472, 23738.236)(125.059685, 3191.3215)(110.06, 1321.32)(165.01541, 3531.735)(169.02069, 510.65002)(147.04205, 187000.3)(148.04596, 18587.342)(149.0502, 2508.87)(133.04135, 4804.1743)
4-Ethylcatechol / Tyrosol	Other polyphenols	Alkylphenols	25430702	20067651	26363188	1136679	973989	4166354	1	686696	596650	1	651039	568246	(159.02026, 11312.348)(160.0151, 1303.405)(161.0077, 2709.09)(161.91641, 8437.131)(163.0603, 3283.8035)(166.0721, 10700.2)(121.06346, 224311.16)(122.066795, 32807.21)(123.071106, 4955.795)(138.8478, 22979.402)(141.4093, 7028.758)(143.08086, 7332.9395)(179.1763, 2901.8901)(180.54105, 210.73499)(142.08418, 26395.771)(143.0837, 4483.78)(145.19334, 13532.919)(146.72632, 40969.207)(147.06061, 4581.525)
5-Pentadecylresorcinol	Other polyphenols	Alkylphenols	1	1	1	965993	1079792	1	1	893939	825912	860157	1082449	1	(324.28464, 6393.0303)(302.26443, 810.97)(325.49362, 5435.2417)(326.301, 27117.75)(360.09598, 7936.289)(361.64297, 1563.1321)(363.5779, 6079.516)(365.2412, 671.16)(343.22064, 102808.71)(345.23325, 23622.105)(346.2399, 5789.5405)(343.26547, 7756.708)(327.25644, 2189.07)
5-Heptadecylresorcinol	Other polyphenols	Alkylphenols	5296451	5668980	5521883	1	142274	446070	505955	1	218639	1	1918742	3914364	(349.1664, 7441.9287)(349.3093, 1916.6366)(388.2623, 7902.015)(390.46872, 7975.6367)(392.2801, 2033.335)(393.28296, 7549.5864)(372.25684, 2798.1313)(373.09814, 2976.325)(374.01532, 2193.0625)(374.2724, 916.97)(372.79538, 7852.552)(375.3007, 1232.3)(355.281, 15303.055)(356.2824, 2449.825)(357.2912, 1177.09)
5-Nonadecylresorcinol	Other polyphenols	Alkylphenols	3311451	608413	403624	48356508	34752076	1	50762496	1	57712516	6251235	6026317	5468258	(376.62164, 18027.959)(377.34033, 5358.634)(360.31918, 9634.054)(381.3535, 1628.7825)(382.3602, 3677.64)(417.09393, 28167.412)(418.5194, 7135.2837)(419.3046, 1994.364)(400.28094, 6150.0986)(403.29102, 3027.97)(399.3289, 2665.0151)
5-Nonadecenylresorcinol	Other polyphenols	Alkylphenols	1908710	2579999	2744363	3185738	2615524	2689692	2028060	2115602	2148365	2220715	2086101	2574269	(380.33255, 16134.972)(416.42938, 598.59283)(416.77664, 3796.9702)(395.2714, 70998.53)(396.27396, 16395.725)(397.2765, 4611.8984)(399.3024, 379.49)
5-Heneicosenylresorcinol	Other polyphenols	Alkylphenols	1508660	1481580	1	1	1498157	1394515	870665	898135	631425	3735554	4296352	3082715	(403.35214, 7376.2573)(403.3558, 1767.9834)(384.34238, 360.78)(407.3602, 233.19)(442.3182, 21796.885)(443.52588, 2164.524)(444.305, 34346.707)(445.3118, 4906.5474)(447.33267, 1098.03)(423.3014, 23259.32)(424.30246, 11731.282)(425.30667, 546.87665)(407.324, 3942.915)
5-Heneicosylresorcinol	Other polyphenols	Alkylphenols	569337	926048	1308248	967599	1064123	919951	904352	1138691	1	3073394	2804329	2188070	(404.37228, 5401.595)(405.3776, 1321.4067)(445.62222, 5693.2397)(448.34323, 822.02747)(427.7249, 5032.862)(426.3243, 1574.9099)(428.11142, 13675.036)(428.85995, 7090.3745)(412.49783, 2341.9373)(414.3597, 2986.625)
5-Tricosenylresorcinol	Other polyphenols	Alkylphenols	14027525	1	15220743	15716083	14660966	14479933	14844719	142883729	15226535	1276021	1486956	1323480	(430.37973, 1263.9943)(471.35068, 1040.4133)(472.3422, 754.11)(454.14062, 132729.72)(456.08524, 267862.75)(456.34152, 172793.73)(457.34467, 133891.94)(454.36133, 1173.26)(435.35687, 304959.94)(436.36005, 80045.484)(437.35944, 18026.826)(438.36368, 1261.2029)
5-Tricosylresorcinol	Other polyphenols	Alkylphenols	1470539	1648284	1643719	1516231	1402570	1387124	1626122	1530888	15255501	991997	4828765	966551	(434.2867, 323.38998)(419.89575, 7845.1797)(417.3864, 13451.47)(418.39, 1522.67)(434.40686, 1095.54)(420.3979, 1781.15)(472.3624, 4938.832)(475.02783, 1684.7035)(476.04044, 874.3433)(453.8496, 35311.03)(454.3528, 9387.004)(455.35144, 1022.81)(455.71878, 4377.1797)(457.4007, 2488.83)(440.87753, 1789.1001)(440.3982, 1058.25)(442.3939, 929.87)(443.384, 3588.53)
5-Pentacosylresorcinol	Other polyphenols	Alkylphenols	20177228	17577440	16489085	13903946	14759358	17482816	15514006	15393258	15855684	1	1423921	826162	(442.41058, 4966.082)(443.4124, 153.16599)(500.38788, 230737.77)(501.5742, 71775.76)(502.4939, 14268.092)(503.39392, 687.5)(484.57513, 5165.914)
5-Pentacosenylresorcinol	Other polyphenols	Alkylphenols	3196326	2477798	2567640	1	1358844	1121268	911515	1	1122681	5674811	4936376	5283582	(458.41376, 4478.8447)(459.4169, 272.32)(440.40222, 40205.25)(441.40735, 24655.473)(442.40988, 4499.7266)(498.5787, 27079.316)(500.78485, 6160.0884)(502.38806, 290.70502)(482.16632, 108365.42)(482.81396, 20067.076)(484.03964, 12650.962)(463.55862, 5606.0063)(464.3975, 7801.33)(465.3981, 575.7)
Bisdemethoxycurcumin	Other polyphenols	Curcuminoids	1204697	2060649	892194	1101611	3624238	1	1669328	1173851	1208412	1002035	748284	875812	(309.11224, 9549.279)(310.61542, 4120.1133)(311.44064, 27039.166)(312.11, 6446.2646)(313.1129, 355.55)(290.6939, 6827.5244)(293.60773, 1250.765)(309.9947, 6537.024)(313.11902, 7663.267)(313.1169, 10097.83)(291.55035, 32354.264)(293.4409, 7516.1836)(349.06796, 57601.01)(350.0725, 8086.207)(352.40854, 2312.2432)(353.0804, 1116.04)(331.20078, 1532.7986)(332.2244, 1013.8213)(315.08994, 2088.8398)(315…
Demethoxycurcumin	Other polyphenols	Curcuminoids	1464735	1853614	1774221	2324451	2905941	2507451	1595901	1200959	1233947	6432022	1	5519839	(338.7543, 11530.485)(341.125, 6719.314)(341.87915, 8639.864)(342.4629, 3516.88)(343.1191, 7231.57)(320.7082, 3538.8992)(324.10995, 1999.665)(340.72763, 12340.605)(342.13214, 2857.99)(321.10934, 45860.574)(322.11264, 8011.1855)(379.47858, 23963.791)(378.08514, 20481.18)(361.29614, 2360.3145)(362.56155, 3839.907)(364.91943, 3754.226)(365.1197, 854.83)(345.21143, 2577.4878)(347.10455, 1002.056)
Curcumin	Other polyphenols	Curcuminoids	1272802	946819	931589	1811298	1979410	480869	840799	781432	2384059	6547223	5255584	6816628	(369.0268, 7852.303)(371.14337, 17382.012)(372.47202, 11143.483)(373.1357, 2425.21)(351.36807, 3364.1865)(353.45963, 2350.6267)(353.62286, 1957.2275)(354.797, 5289.5864)(355.1295, 1780.32)(371.1385, 5765.35)(372.80875, 899.02997)(353.33157, 2020.1078)(408.23138, 11088.989)(409.49243, 3250.0278)(391.83167, 4330.3086)(393.83313, 749.0025)(393.8725, 7196.055)(395.1267, 2079.74)(396.1341, 2518.75)(37…
Psoralen	Other polyphenols	Furanocoumarins	820575	2038002	1	6753908	289495	249195	1	6057467	6186378	748315	1278008	883924	(186.31677, 412.11002)(171.02905, 2862.8726)(172.0286, 76.95)(188.54329, 2741.1829)(189.7973, 1802.4587)(191.4513, 2079.81)(192.0554, 399.72)(172.89502, 3211.827)(174.04245, 953.88)(224.99821, 29304.396)(226.0018, 5417.9854)(208.15263, 4375.1133)(210.99, 132.68)(210.39792, 960.865)(211.885, 512.04425)(212.78044, 1455.1526)(213.5345, 4311.305)(193.35304, 3200.2551)(196.0189, 30.56)
Bergapten / Xanthotoxin	Other polyphenols	Furanocoumarins	377080	1	644316	674011	2319041	489947	5617111	3186077	3125624	3711477	352664	694231	(217.75821, 7985.6143)(217.0427, 155.035)(199.03636, 5898.796)(201.03987, 16115.106)(202.37688, 11841.007)(203.0503, 66753.84)(219.4572, 2809.406)(221.72339, 1964.6567)(200.91957, 24321.55)(202.18924, 13265.291)(202.65018, 14554.057)(203.30122, 73327.59)(204.05305, 6693.4165)(257.6093, 1794.2021)(260.01154, 1357.1274)(260.5135, 899.32996)(261.0106, 616.29)(241.57579, 44511.598)(242.00322, 21409.3…
Isopimpinellin	Other polyphenols	Furanocoumarins	928733	605182	1	44687043	44019680	41338916	36685740	40607144	43674844	623003	461791	1	(247.76942, 464906.66)(249.20622, 40935.18)(251.0643, 382.21)(232.04877, 14233.57)(233.0502, 10369.98)(247.05681, 1420064.6)(248.06, 118471.04)(249.0506, 179599.45)(230.55682, 359.455)(289.0189, 749.62665)(291.03, 475.7)(271.8487, 1782.8971)(273.30072, 2446.6077)(274.0565, 234.48)(254.03934, 2538.086)
p-Anisaldehyde	Other polyphenols	Hydroxybenzaldehydes	9473467	7905342	1	6658139	12169621	2087928	2184795	1	2514286	3866528	5840286	5108264	(120.04824, 453.79)(157.00638, 11033.267)(162.21971, 482.16833)(164.05325, 731.135)(121.48543, 3894.0642)(122.0589, 9586.34)(175.01625, 144487.4)(176.02052, 9166.993)(177.01567, 1724.6183)(137.05753, 43606.59)(138.05495, 1469.3875)(139.049, 525.82)(143.03589, 8454.723)(144.042, 322.59335)
4-Hydroxybenzaldehyde	Other polyphenols	Hydroxybenzaldehydes	345522	334961	659932	557984	2484803	562762	422275	677325	5953864	579761	522905	559219	(122.54013, 21975.053)(124.04041, 21703.482)(125.0413, 5686.71)(127.0483, 340797.16)(105.0295, 1935.344)(108.04392, 2404.2)(160.9992, 2965.2546)(146.99374, 14827.94)(147.9956, 386.94)(146.8104, 1872.2856)(148.0362, 1183.19)(129.02083, 252373.75)(130.02393, 17640.68)(131.029, 1541.41)
Protocatechuic aldehyde	Other polyphenols	Hydroxybenzaldehydes	1241391	621173	1	477228	456584	610928	1329024	835738	1861949	1865851	1830278	1214052	(139.17491, 8834.064)(141.038, 9915.945)(121.528244, 6992.36)(139.04039, 23935.055)(140.0383, 3845.8867)(121.696915, 12424.645)(124.03747, 1042.7133)(178.99431, 2225.6267)(163.02803, 293.92)(145.29054, 54374.086)(147.85832, 22773.86)(148.0257, 4887.24)
2,3-Dihydroxy-1-guaiacylpropanone	Other polyphenols	Hydroxybenzoketones	1	1636897	1973449	9081109	7422729	6643507	2518939	2625422	2544657	10763543	9960461	4747075	(212.66777, 8928.93)(215.74939, 914.3833)(217.0865, 3202.11)(194.34583, 12512.695)(196.0651, 190.45)(199.0752, 8164.71)(213.07426, 21270.799)(214.08122, 2925.732)(195.06349, 194338.42)(196.06671, 22046.79)(197.07582, 1989.18)(198.0773, 161.54)(234.35693, 2978.4568)(237.73364, 3191.625)(238.0616, 207.26)(239.0718, 316.25)(240.0697, 193.57)(219.05283, 3433.698)(219.0568, 4830.1)(220.0596, 644.36)
Ferulaldehyde / Mellein	Other polyphenols	Hydroxycinnamaldehydes	1962620	605053	5002492	91128583	5323202	9044877	3963426	967870	921016	10276539	7745256	2366684	(178.26425, 7891.9233)(160.05327, 53204.05)(161.05237, 5833.0522)(162.05373, 83.57333)(180.07172, 22433.885)(180.07378, 3204.5781)(181.0654, 6070.38)(161.72923, 7950.627)(163.4409, 13847.318)(165.0683, 32159.1)(218.026, 9082.55)(219.02466, 160331.56)(220.0271, 11469.232)(221.02664, 12064.5)(222.2786, 889.73)(223.0338, 481.06)(199.01158, 10715.525)(202.6938, 7167.622)(204.06215, 313.53998)(185.161…
Coumarin	Other polyphenols	Hydroxycoumarins	2496864	515584	8044327	4754322	33077788	4439931	28359522	27764680	23794216	768583	3929839	1	(146.61049, 67703.54)(147.75546, 5386.664)(128.40028, 138666.14)(129.02039, 776.2)(148.76318, 580491.44)(149.76445, 54762.574)(132.0431, 6031.2866)(186.00397, 3345.985)(190.0106, 48417.29)(191.0144, 3158.13)(169.98729, 5301.264)(170.99165, 785.66)(171.36511, 4432.789)(174.04135, 9271.391)(152.26865, 682.53)
4-Hydroxycoumarin / Umbelliferone	Other polyphenols	Hydroxycoumarins	943004	924718	1	15451746	12111418	11061502	13363132	2486430	3430318	9269768	5238904	8371210	(162.031, 1575.8331)(144.68806, 10760.424)(149.0377, 3805.63)(163.03741, 299350.38)(164.04146, 29630.596)(165.0442, 4982.1)(145.69653, 1870.3999)(182.98468, 3829.398)
Esculetin	Other polyphenols	Hydroxycoumarins	1332180	1704869	441065	1379500	1345686	1289511	391456	2268874	3194043	1200162	995377	2307767	(178.36089, 35652.27)(179.53247, 5321.056)(180.5307, 185.67001)(161.68579, 1366.8766)(179.1991, 35735.004)(180.70439, 5123.4536)(161.60014, 2288.3328)(219.851, 1971.6716)(203.02025, 47927.156)(204.69533, 5321.14)(185.76132, 452.185)
Esculin	Other polyphenols	Hydroxycoumarins	6534737	1	5124188	378463	6600846	702521	3258718	1	1921714	4924506	3787699	3802747	(340.28394, 1294.5619)(342.08554, 378.825)(344.0826, 718.93)(322.0628, 12143.079)(323.05725, 5657.593)(342.88617, 2116.966)(344.0895, 7267.8364)(345.6011, 1265.3999)(323.62796, 22015.78)(325.08368, 4993.0464)(325.07803, 1682.8365)(379.04233, 14022.973)(380.0472, 2752.8838)(366.36575, 2801.63)(363.3969, 12013.874)(364.0645, 1792.6342)(347.06772, 3562.3499)(348.57565, 1680.875)(349.56757, 2635.6501…
Estragole	Other polyphenols	Hydroxyphenylpropenes	1	14607184	1	22407676	22162548	19331960	21287858	29770660	28813202	21236622	23649980	36718435	(130.07536, 60314.367)(171.0791, 58156.07)(172.0812, 8768.565)(131.08421, 429852.34)(132.08786, 47002.098)(193.05829, 10086.795)(149.09384, 14707.445)(153.06787, 16359.042)(154.0659, 1492.4)
2-Methoxy-5-prop-1-enylphenol / Eugenol	Other polyphenols	Hydroxyphenylpropenes	1420679	1341527	1715141	2665468	2804175	2119909	1115480	1	1081732	1341710	1376553	1604484	(166.42528, 49977.45)(166.08675, 11706.89)(168.0951, 2456.445)(146.07242, 3553.5203)(168.09714, 12926.54)(147.07875, 32835.92)(148.08047, 4119.868)(203.05103, 1646.0941)(188.07452, 3234.5076)(188.07005, 692.425)(169.97488, 35030.49)
Acetyl eugenol	Other polyphenols	Hydroxyphenylpropenes	3843196	5054052	3561482	73771032	75636800	62246900	59966588	65872440	61461364	61824084	1	62662343	(207.09879, 24868.3)(208.10007, 1851.6711)(210.60641, 599.50104)(210.1033, 75.58)(188.83484, 13969.728)(190.08833, 2335.33)(191.76062, 1312.0166)(192.0896, 755.12)(207.0994, 18409.39)(208.1018, 811.33)(189.64781, 1271360.9)(190.34311, 177547.28)(249.06241, 774.2182)(250.06523, 1541.4401)(229.40863, 2763.1562)(233.0503, 4702.64)(229.26636, 1858.1863)(213.27872, 2976.2778)(214.58318, 2851.875)(215.…
[6]-Gingerol	Other polyphenols	Hydroxyphenylpropenes	577423	456934	277933	1081877	1314154	1187222	1960942	1566167	2081481	2641382	2022108	2987883	(302.23666, 1465.6951)(304.232, 231.17)(284.47046, 548.2)(287.2256, 234.33)(305.2418, 5233.84)(340.60995, 7295.4688)(342.0121, 13235.3125)(343.7984, 11498.712)(344.53564, 28815.062)(345.1984, 11333.995)(323.27322, 1786.2065)(324.4038, 12344.672)(325.6305, 10012.888)(326.62018, 12120.558)(326.8618, 21241.87)(327.1926, 470.2)(323.5032, 15842.891)(324.22156, 5827.0396)(305.21005, 35705.613)(306.2122…
1,4-Naphtoquinone	Other polyphenols	Naphtoquinones	4630997	3900851	2266028	1	820863	3547264	1052207	483353	1257019	1498915	1764297	2985765	(158.83984, 101640.45)(159.0419, 9907.846)(160.0438, 146.79)(141.02963, 1839.4675)(143.0347, 8517.36)(144.0383, 196.47)(161.7687, 3189.55)(164.0575, 627.72)(142.91455, 5892.7046)(144.20935, 5368.7666)(144.71326, 4740.547)(145.0486, 12880.84)(146.0516, 239.07)(197.8214, 10202.549)(198.83997, 4278.9116)(202.01074, 6102.295)(202.0122, 91.97)(203.0121, 279.76)(179.71808, 7080.8755)(181.13318, 2329.95…
Juglone	Other polyphenols	Naphtoquinones	1	760576	396071	728135	748003	940742	153927	1	133046	54771	187473	1	(175.3686, 1500.5518)(177.37177, 568.44)(158.22636, 4497.448)(158.69203, 544.24335)(175.64246, 2065.808)(179.0519, 696.51)(158.74667, 8708.224)(213.9961, 833.4025)(215.992, 1625.8)(197.4896, 4591.33)(199.02736, 2212.3933)(200.02814, 1429.3325)(201.36768, 3839.2734)(202.037, 5413.195)(181.44754, 2056.9814)(184.0284, 151.87)
Catechol	Other polyphenols	Other polyphenols	1	170483	266745	1	1	1	1	959541	914574	210640	717958	256400	(111.64034, 9239.287)(113.54515, 521.87)(111.043205, 10694.542)(112.04164, 1083.47)(150.00175, 590.0367)(130.9883, 1706.22)(135.03014, 9240.625)(134.0384, 235.94)(119.02779, 41627.13)(120.02707, 1704.2601)
Pyrogallol	Other polyphenols	Other polyphenols	1	5324207	4864718	6123932	2820124	3390442	2568063	2573798	2472186	12632756	12231065	13483991	(131.0482, 587.85)(146.9799, 6476.27)(149.02171, 104413.09)(150.02509, 8572.313)(151.0321, 346.655)
Phenol	Other polyphenols	Other polyphenols	2131513	1447976	1276158	136066	137108	130016	352285	398447	379658	485248	1	301574	(133.00624, 9002.689)(115.75013, 8787.4375)(117.6595, 9009.241)(118.0384, 471.19998)(103.03626, 661.88336)
3,4-Dihydroxyphenylglycol	Other polyphenols	Other polyphenols	11862109	14999159	13944026	42430434	221796448	234317056	594273472	593137947	575100140	19838248	3619412	17260792	(170.05797, 78460.625)(171.06212, 13548.153)(172.06247, 1668.3025)(152.04974, 512.86)(171.46788, 2436.3262)(174.0731, 1291.02)(175.0758, 382.0)(153.05357, 21143.61)(154.05772, 3372.2515)(211.14937, 6064.714)(213.53003, 4650.7524)(214.69714, 276868.22)(215.0295, 453819.53)(193.00726, 567.84)(193.04814, 1560676.9)(194.05252, 253958.27)(176.04135, 1734.2377)(180.0543, 206.82)
Coumestrol	Other polyphenols	Other polyphenols	972053	315786	731975	846327	1	142638	348666	610685	631951	405119	325844	322817	(270.90128, 4075.7441)(271.54196, 1454.175)(273.04877, 3943.535)(252.42891, 1055.1399)(270.879, 2218.9685)(272.3914, 1203.5233)(273.0533, 4727.11)(252.04129, 5898.103)(253.23636, 1162.692)(255.03772, 1754.2767)(308.00092, 463.67398)(313.0106, 725.15)(290.49487, 611.2962)(289.9865, 168.99)(292.5338, 1502.012)(295.0347, 137.96)(275.02225, 2452.1301)(278.02603, 1376.3368)
Arbutin	Other polyphenols	Other polyphenols	1302222	779907	1	1587027	1724640	1813863	2156519	2379545	3215994	1851073	1682332	1815017	(273.86658, 2739.9265)(274.42505, 534.3)(255.08015, 3724.43)(256.74637, 6702.65)(259.08755, 6842.7163)(273.1002, 414.94)(255.08669, 45524.02)(256.08777, 4673.275)(313.5586, 449.12878)(294.0408, 1113.3467)(297.04727, 675.29)(297.08722, 4108.426)(299.419, 807.635)(299.0914, 985.34)(278.5218, 12682.396)(279.7476, 948.88495)
Phlorin	Other polyphenols	Other polyphenols	4358111	3954624	3424560	3622683	1627957	1582126	4326317	5402284	4631018	2167609	3148164	1097062	(289.17038, 8884.631)(290.75858, 2078.3132)(291.09442, 5615.037)(293.0967, 18856.318)(273.0831, 7592.0703)(273.5807, 3346.6)(273.0861, 460.94)(289.09238, 2205.04)(290.096, 867.145)(271.0834, 31533.557)(272.08627, 2978.461)(273.07977, 1709.0599)(328.88248, 7739.192)(328.71957, 4288.9)(329.0621, 93.69)(309.92554, 7803.433)(310.0407, 2065.1274)(311.0357, 374.405)(311.73996, 5654.4224)(313.5254, 2168…
Carvacrol / Thymol	Other polyphenols	Phenolic terpenes	1	7456761	5575421	14897086	12435477	1	11686639	11738823	12107403	17582928	17188958	18331060	(151.1102, 225120.72)(152.11324, 24872.682)(132.09372, 5982.55)(151.10959, 23664.27)(152.11185, 161.16501)(133.09969, 132477.94)(134.10295, 14499.801)(190.9639, 17650.682)(191.0704, 1310.575)(174.56395, 10268.561)(177.0686, 20700.95)(173.09389, 47981.97)(174.09496, 7171.86)(155.08374, 10069.816)(156.08766, 974.23676)
Carnosol	Other polyphenols	Phenolic terpenes	761768	1206297	2647908	2163632	2153509	2604026	1846491	28376422	30759588	2914505	3330096	3120169	(330.18597, 190550.48)(331.18652, 56019.695)(332.18536, 544.07)(313.28915, 2405.6123)(313.68134, 534.57)(316.1824, 5348.25)(333.1978, 9935.195)(334.19946, 2033.3501)(315.8983, 5897.8057)(315.51614, 4538.447)(316.85974, 8190.26)(317.70013, 7619.365)(318.2, 13748.54)(370.57623, 15871.476)(371.4882, 1991.1567)(373.1575, 5830.375)(375.1506, 3741.71)(351.9673, 8662.215)(354.13922, 20634.734)(354.1364,…
Epirosmanol / Rosmanol	Other polyphenols	Phenolic terpenes	724652	869975	580777	2219473	1221444	1389181	1	1	1	6301177	6429730	1	(347.42953, 2304.2688)(349.18555, 5891.967)(349.93936, 3764.3252)(328.74033, 6676.747)(330.16855, 4236.2783)(331.8406, 4300.3467)(333.1826, 2974.42)(348.5195, 4226.993)(349.1856, 10202.64)(350.1948, 956.25)(329.67392, 2942.45)(331.18396, 2787.795)(334.1982, 489.53)(386.64017, 37875.39)(387.64606, 7873.9766)(389.1503, 3684.714)(390.3978, 189.47499)(368.62598, 16390.6)(368.13516, 8739.425)(370.1638…
Hydroxytyrosol	Other polyphenols	Tyrosols	4981292	4810177	2872860	26787584	23973936	26381308	57403544	50001360	58139572	18459560	16540063	16662362	(155.567, 1644.0316)(156.5683, 1095.5951)(158.7426, 1365.8666)(159.0777, 410.74)(137.05858, 14293.417)(140.86736, 15995.122)(140.0665, 6315.06)(157.79283, 1404.7786)(137.0576, 93004.66)(138.05826, 8451.735)(197.02965, 280.665)(198.0336, 1286.62)(175.01631, 52958.152)(176.01978, 10660.536)(177.0214, 536.49)(177.6385, 979369.75)(178.25739, 122748.266)(182.0672, 2669.19)(160.50282, 26034.596)(161.04…
p-HPEA-AC	Other polyphenols	Tyrosols	1529065	917347	1	3360579	1837494	1	7466983	402700	7564508	1725597	2282593	1	(181.79494, 18256.18)(183.08243, 17738.627)(183.59146, 8556.88)(185.087, 525.93)(163.29242, 8007.7256)(165.40736, 2633.8633)(167.0845, 1806.92)(181.41792, 5807.0566)(165.0796, 722684.06)(165.57988, 107881.21)(168.09076, 18635.184)(219.04327, 10066.485)(220.053, 170.62)(202.36911, 8922.54)(203.36586, 651.3767)(207.0373, 416.32)(205.07402, 3697.1313)(204.74644, 1042.37)(207.0781, 891.42)(208.0776, …
p-HPEA-EDA	Other polyphenols	Tyrosols	29762876	30093812	32629244	58445588	52923008	49331880	10698824	35213736	12686360	48296088	42847676	14946081	(305.04114, 842178.4)(306.13623, 144687.67)(307.13983, 55479.676)(308.14133, 8852.941)(309.14462, 4535.228)(287.12427, 29960.848)(288.129, 59025.082)(289.1361, 51953.7)(290.1358, 10129.29)(305.1333, 1337629.5)(306.1365, 207503.67)(287.6975, 55869.316)(288.80383, 55068.58)(290.13983, 10347.728)(344.31506, 13500.21)(346.09875, 3739.9238)(347.30353, 3155.23)(348.30243, 11727.209)(349.10672, 877.4100…
Hydroxytyrosol 4-O-glucoside	Other polyphenols	Tyrosols	1	1	1479074	7492174	9575573	9525015	7309834	5733585	5556297	6536944	5327541	7528062	(316.78842, 5055.409)(319.79456, 21524.363)(320.62796, 29417.25)(299.7793, 1655.1866)(300.36188, 1908.685)(301.1104, 3573.69)(317.7517, 4218.54)(319.1299, 5094.55)(320.1354, 213.83)(321.1248, 64420.66)(322.1308, 9296.23)(300.61798, 4281.77)(301.45743, 11245.444)(303.1184, 34473.72)(360.0938, 4958.6323)(337.0726, 1966.78)(339.60605, 271170.7)(340.1083, 53077.3)(341.11652, 8911.729)(342.12396, 487.…
3,4-DHPEA-EDA	Other polyphenols	Tyrosols	1	1	1	410510	1	1229942	4164370	3445773	1	2826767	2747859	2690049	(321.628, 15656.07)(322.12952, 11137.83)(323.13843, 27551.2)(324.64124, 9600.07)(325.1387, 13649.12)(302.78458, 33315.504)(304.1211, 8652.225)(305.11676, 86726.14)(306.1198, 14176.965)(321.13086, 65888.086)(322.1347, 12656.048)(305.12894, 73267.89)(306.13315, 13761.556)(308.1297, 1071.705)(359.84277, 27872.045)(360.95273, 7668.1997)(362.098, 1636.0725)(344.97455, 3776.9744)(346.46313, 3090.6199)(…
Ligstroside-aglycone / p-HPEA-EA	Other polyphenols	Tyrosols	1444570	927660	1	1174037	1	2131348	2931234	2139519	2764872	3804983	2785568	1900879	(362.63657, 3699.755)(365.89615, 2638.9626)(366.1432, 2764.705)(344.4294, 3548.0151)(347.12808, 13405.399)(348.64154, 1586.55)(363.2884, 3236.3755)(364.3958, 831.91)(366.1508, 2912.73)(345.26077, 10342.599)(346.13654, 1644.808)(347.1302, 93.12)(403.35516, 1570.1)(384.8419, 17315.715)(385.52252, 3472.203)(387.7579, 3194.0466)(385.6881, 8768.062)(386.9929, 3207.6985)(390.1335, 788.35)(368.1184, 109…
3,4-DHPEA-EA / Oleuropein-aglycone	Other polyphenols	Tyrosols	432918	479406	500724	1	843249	721415	1812673	1570116	1654592	1706522	1678175	1626480	(379.13168, 5385.122)(380.136, 366.74)(360.51837, 1052.3)(362.1224, 714.62)(381.1514, 5618.5527)(384.1505, 431.57)(362.27716, 1904.2057)(363.93787, 613.62195)(420.00644, 17711.389)(420.35303, 1813.155)(421.76562, 2554.1965)(422.09875, 327.065)(401.76016, 1935.3066)(400.0933, 147.87)(401.11868, 30029.893)(402.12177, 6819.3296)(403.12732, 1691.4733)(384.11514, 2572.4102)(384.6219, 590.475)(387.1187…
Oleoside 11-methylester	Other polyphenols	Tyrosols	2146500	2302879	1	2417058	2391164	1536536	3907229	2666202	5078074	2666511	10602474	626166	(404.76477, 11246.842)(386.6982, 3350.967)(387.1291, 147.07999)(405.7395, 1970.4539)(408.1547, 10741.905)(391.47083, 1202.4066)(392.1359, 1769.49)(444.00772, 12705.466)(444.8157, 5521.773)(445.1036, 157.40666)(426.3371, 18409.16)(427.757, 11267.043)(427.0928, 175.85)(428.40634, 28487.975)(430.1392, 19253.285)(409.3067, 21140.537)(410.24863, 3847.8086)(411.10992, 382.905)
Oleoside dimethylester	Other polyphenols	Tyrosols	1	1245771	1795253	2647484	2656895	2501141	1	1	1	2010661	1317291	1690704	(418.15503, 8650.586)(419.1579, 1849.8225)(400.80603, 18856.584)(419.15567, 1504.07)(401.42844, 9536.123)(402.71756, 1012.0586)(404.14587, 907.39)(458.25064, 6825.1953)(458.11356, 2349.4668)(459.10147, 1140.6266)(440.8239, 3179.8699)(440.1081, 135.68)(442.47836, 3277.8381)(425.2415, 5284.973)(426.84866, 2648.6772)(428.138, 1778.87)
Ligstroside	Other polyphenols	Tyrosols	1528957	659821	1626459	758784	653748	1451524	1	666650	516116	2227023	2473163	2106436	(524.1951, 2792.67)(525.2012, 3311.4702)(507.39856, 3335.5598)(509.38104, 2647.09)(510.78598, 3481.28)(511.5234, 1074.2567)(512.1967, 1414.2001)(526.2024, 1955.0366)(526.2152, 1417.41)(508.98502, 2795.3801)(509.6844, 1098.455)(513.207, 295.69)(565.15, 260910.19)(566.1539, 73492.83)(567.1543, 17863.398)(568.1594, 3350.6255)(569.1705, 1307.07)(546.9174, 16507.072)(547.89624, 10836.745)(548.1445, 55…
Demethyloleuropein	Other polyphenols	Tyrosols	1250081	1094459	17558804	1035735	1	451149	337386	340929	1	4564762	1800931	2374976	(528.8338, 381.85336)(529.84875, 1242.1633)(508.49695, 16689.373)(509.67355, 5516.91)(510.6734, 883.75)(513.174, 138.73)(533.19104, 1303.5701)(511.51624, 4195.16)(511.67303, 1476.01)(514.1655, 3808.3)(515.1687, 2065.34)(551.5546, 3625.1074)(550.1194, 3488.05)(552.12317, 19908.219)(553.126, 36640.97)(552.8342, 1282.5951)(532.0383, 30078.791)(533.1548, 11558.544)(533.1612, 6632.1367)(534.1664, 264.…
Oleuropein	Other polyphenols	Tyrosols	1	925739	893689	1	281213	706111	1395303	652310	720681	1259912	967902	1034568	(541.1863, 1646.1832)(542.2051, 13201.1)(543.18555, 22122.895)(544.1864, 5808.305)(543.8674, 11614.569)(543.2063, 12340.36)(544.2068, 1943.09)(545.1911, 32539.77)(546.1953, 8779.67)(525.3941, 10983.126)(525.1958, 8338.196)(528.54193, 4500.6333)(528.2057, 349.07)(529.2003, 824.4)(581.13385, 376.99)(566.51917, 10631.298)(567.1411, 13636.09)(565.7603, 2002.4401)(567.1905, 1196.7833)(569.20557, 4174.…
2-Hydroxybenzoic acid	Phenolic acids	Hydroxybenzoic acids	1241391	621173	1	1	1	610928	1	1	1	1865851	1830278	1214052	(139.03122, 6866.814)(141.0377, 10005.63)(121.0275, 12264.71)(139.04143, 15910.567)(121.62992, 12267.192)(123.53555, 956.525)(178.99374, 1102.785)(163.02803, 293.92)(146.18585, 78025.86)(147.82497, 25967.057)(148.0257, 4887.24)
3-Hydroxybenzoic acid	Phenolic acids	Hydroxybenzoic acids	1	1	1	1	1	1	1329024	835738	1861949	1	1	1	(139.0385, 38865.17)(140.0383, 3845.8867)(121.0278, 1935.8049)(143.01433, 3845.2834)
p-hydroxybenzoic acid	Phenolic acids	Hydroxybenzoic acids	1241391	621173	1128401	477228	456584	610928	1329024	835738	1861949	1865851	1830278	1214052	(139.15689, 7904.621)(141.0381, 7479.1)(122.69784, 5454.7397)(139.34132, 21749.918)(140.0383, 3845.8867)(121.63039, 11362.194)(124.03747, 1042.7133)(178.99345, 3001.94)(181.0027, 67.01)(159.9874, 8264.01)(162.52716, 322.3175)(145.43481, 83228.32)(147.88197, 22612.979)(148.0257, 4887.24)
4-Hydroxybenzoic acid	Phenolic acids	Hydroxybenzoic acids	1241391	621173	1	477228	456584	1	1329024	835738	1861949	1865851	1830278	1214052	(139.19856, 6866.154)(141.0383, 9826.26)(121.528244, 6992.36)(139.04039, 23935.055)(140.0383, 3845.8867)(121.40444, 9134.443)(123.5357, 898.925)(178.9946, 2363.6401)(163.02803, 293.92)(145.31802, 59436.363)(147.85832, 22773.86)(148.0257, 4887.24)
2,6-Dihydroxybenzoic acid / 3,5-Dihydroxybenzoic acid / Gentisic acid / Protocatechuic acid	Phenolic acids	Hydroxybenzoic acids	1	1	1	1439548	533583	1325700	1544049	1755743	1805890	3758398	3691297	3033920	(155.03014, 33553.133)(156.03279, 1843.6046)(159.0448, 404.03)(137.02313, 8437.199)(138.02528, 187.43501)(194.18977, 919.29004)(175.53778, 6265.1465)(177.01352, 5354.285)(178.0202, 607.05005)(159.00401, 5689.5996)
Vanillic acid / 3,4-Dihydroxyphenylacetic acid	Phenolic acids	Hydroxybenzoic acids	1	2566053	647689	6463747	3921418	1	4529532	1	9764375	512373	547583	500618	(170.3355, 37720.723)(171.05008, 15004.3)(172.05646, 10725.744)(150.69904, 32768.383)(151.6597, 5671.6597)(153.43637, 10686.908)(155.04083, 8004.67)(169.80202, 41836.26)(208.33803, 461.65665)(188.9898, 833.2)(191.03406, 4563.6143)(192.0234, 361.84)(173.01892, 4414.9243)(174.02283, 827.77997)
Gallic acid	Phenolic acids	Hydroxybenzoic acids	2615362	2385448	3076968	656600	232611	517293	680710	709013	775488	548603	1	516950	(171.77632, 3174.7715)(173.5303, 2309.3)(153.51794, 1610.775)(156.0223, 703.98)(173.20374, 8938.267)(174.03894, 10125.382)(153.733, 16852.645)(154.68813, 273.11832)(157.0283, 293.85)(210.98314, 3275.2532)(192.40819, 2620.03)(194.97784, 692.94)(195.9771, 1043.61)(193.84407, 442.0533)(174.99945, 53881.043)
Gallic acid ethyl ester / Syringic acid	Phenolic acids	Hydroxybenzoic acids	28124348	26692358	33203992	1	410472	448514	2224579	2067043	2028284	974213	926727	939935	(198.45677, 2053.428)(201.72296, 236.38)(180.54291, 1382.71)(184.0507, 4695.49)(199.05884, 2912.2651)(200.06146, 533.985)(181.45154, 42950.71)(182.65215, 6696.5537)(184.55984, 145681.86)(185.5639, 202281.39)(186.0649, 83535.34)(243.02722, 1053.33)(222.51329, 12315.296)(221.04175, 470485.78)(222.04411, 44726.992)(223.03914, 133174.8)(204.3702, 3785.2532)(205.53604, 414.83002)(206.0391, 777.79)
4-Hydroxybenzoic acid 4-O-glucoside	Phenolic acids	Hydroxybenzoic acids	5019133	920536	555190	361375	1014384	1375224	994248	843482	943048	7120482	6443683	504319	(301.20132, 4307.473)(302.59473, 1707.59)(303.0965, 264.63)(283.1774, 2802.6587)(284.30154, 7770.2554)(285.68475, 8674.276)(286.58658, 4010.2075)(287.0891, 12182.939)(301.0934, 3973.7)(302.09747, 1487.9451)(285.41956, 9294.327)(285.59164, 1448.6951)(340.04825, 6571.0737)(341.3862, 306.78665)(343.055, 1178.18)(345.0562, 201.04)(323.25842, 1028.8245)(327.0395, 1377.23)(324.1641, 11579.108)(325.0792…
Ellagic acid	Phenolic acids	Hydroxybenzoic acids	446362	251587	889005	176301	451978	146684	391797	397226	431301	1	1	1	(303.6804, 4656.8833)(285.66318, 3572.6199)(289.0129, 11109.12)(305.0245, 7062.4297)(287.01205, 1448.3969)(341.47205, 3781.6702)(341.975, 1567.86)(323.96115, 1280.275)(326.9708, 592.9)(324.9978, 9695.549)(325.99994, 740.53)(308.9874, 36965.52)(308.98627, 4684.6025)(309.98593, 1238.155)
Protocatechuic acid 4-O-glucoside	Phenolic acids	Hydroxybenzoic acids	350765	469841	2926064	2652928	3312977	2227939	1630604	1618617	2586314	5639438	4845012	4721159	(316.91455, 3719.9397)(318.75177, 6381.5435)(320.0829, 2354.35)(298.9077, 1965.0034)(301.07733, 4200.79)(303.0862, 29885.46)(319.38165, 5166.8687)(320.0902, 689.64)(301.38135, 3156.0403)(302.7516, 10266.213)(303.58456, 17218.295)(304.08304, 14210.886)(357.6822, 23382.207)(359.7167, 19251.658)(360.05008, 844.90753)(361.04953, 77496.89)(340.03555, 3061.2515)(342.54593, 1457.9366)(343.0387, 890.265)…
Gallic acid 3-O-gallate	Phenolic acids	Hydroxybenzoic acids	210535	333140	467710	461295	645667	190472	177616	113536	332576	94800	660747	68804	(325.04224, 820.6633)(327.0401, 1007.49)(304.69183, 2929.7)(307.0306, 1681.8534)(309.0328, 4822.88)(324.0503, 14704.711)(325.37927, 193.62666)(307.23663, 64602.48)(309.04248, 17001.92)(362.9991, 369.34998)(344.99265, 3965.67)(345.02374, 5146.997)(329.01468, 651.25)(330.02588, 3226.25)(331.02625, 3670.375)
Gallic acid 4-O-glucoside	Phenolic acids	Hydroxybenzoic acids	184170	146748	115351	338590	326281	1352312	710065	785803	335950	1133111	528620	493644	(334.07596, 4393.6143)(336.08044, 6035.205)(315.40793, 4244.04)(319.0801, 10026.415)(334.92093, 1941.6832)(336.08508, 20173.836)(336.0818, 4221.74)(317.47797, 5324.748)(319.0806, 16818.926)(320.08386, 2159.44)(376.64642, 5938.4062)(377.0472, 4866.1)(354.0331, 7454.9873)(354.0442, 169.73)(356.56714, 6138.3945)(357.1943, 2120.8286)(358.26508, 2232.734)(337.26108, 6532.896)
Galloyl glucose	Phenolic acids	Hydroxybenzoic acids	1	146748	115351	338590	326281	1	710065	785803	335950	1	528620	493644	(334.07797, 1530.206)(316.076, 6173.1)(319.0801, 10026.415)(335.2869, 1862.1461)(336.08508, 20173.836)(336.0818, 4221.74)(317.41455, 4535.2163)(319.0816, 12981.44)(320.0849, 818.9)(376.37827, 2971.1465)(377.0472, 4866.1)(354.69913, 3191.7566)(356.62314, 6674.445)(357.07043, 2322.5364)(358.56534, 2474.025)(337.3965, 984.3467)
5-O-Galloylquinic acid	Phenolic acids	Hydroxybenzoic acids	1610932	1323349	1222591	1351816	1263713	1510374	1752432	1983221	1892790	2017109	1875032	2044834	(345.57556, 9767.283)(346.57593, 2381.1448)(347.07983, 4091.78)(348.08246, 629.77)(349.0847, 1228.56)(326.06503, 2849.2068)(327.06366, 1061.195)(348.87018, 2909.286)(349.5949, 2335.9875)(330.16995, 12147.256)(331.175, 2690.3591)(384.63495, 651.23596)(389.0516, 2430.11)(365.0239, 121.44)(368.3983, 3552.6433)(370.08014, 2791.4448)(371.07166, 3232.3)(372.0796, 1224.755)(349.81107, 5621.0923)(351.564…
Ellagic acid arabinoside	Phenolic acids	Hydroxybenzoic acids	1893398	1589484	753265	130784	163805	226955	1	1	1	309621	1113781	1095366	(437.0557, 1837.3776)(438.05103, 24207.648)(417.0406, 208.96)(419.0334, 200.66)(420.0528, 5094.29)(421.0516, 8791.49)(435.0661, 7907.235)(420.72324, 5948.957)(421.72705, 3663.0598)(422.0681, 3817.02)(473.68716, 9110.19)(474.02664, 2669.62)(457.50882, 2406.6174)(459.00323, 7580.0596)(460.01855, 1562.1951)(461.02008, 6866.395)(459.04868, 2688.1372)(458.0508, 606.52)(442.8295, 1530.822)(443.536, 260…
Ellagic acid acetyl-xyloside	Phenolic acids	Hydroxybenzoic acids	1	196669	1	232544	175181	1	1	140048	1	1	1	1	(459.0545, 6374.97)(460.0594, 140.57)(519.0264, 1117.9467)(497.00412, 11440.833)
Ellagic acid glucoside	Phenolic acids	Hydroxybenzoic acids	140323	124194	148108	136924	121603	177165	1	1	1	321277	195223	267263	(467.33047, 2880.855)(452.73102, 4387.635)(453.06406, 7136.8867)(486.02667, 314.63)(489.0682, 5977.83)(469.0399, 8099.3394)(470.0472, 1189.29)
Valoneic acid dilactone	Phenolic acids	Hydroxybenzoic acids	248296	278851	290089	132188	132136	124659	90542	89151	109803	1	1	1	(512.98987, 2523.591)(494.982, 337.19)(492.9949, 7384.6963)(476.993, 4988.6733)
1,3-di-O-caffeoylquinic acid / 4,5-di-O-caffeoylquinic acid	Phenolic acids	Hydroxycinnamic acids	887557	627807	617785	1	1	1	1	1	1	1	1	1	(518.1225, 151.56)(522.1283, 123.74)(499.1222, 266.25998)(503.12375, 496.29004)(504.1346, 811.45)(520.1578, 1232.7)(556.1076, 413.44)(537.076, 11497.526)(538.07935, 1863.1499)(539.0689, 1010.02)(542.1098, 3429.9434)(543.6142, 3430.145)(521.10187, 908.3333)
methyl-3,4-di-O-caffeoylquinic acid/methyl-3,5- di-O-caffeoylquinic acid	Phenolic acids	Hydroxycinnamic acids	206990	126127	1	696970	774516	1	1110047	1161949	822630	14932202	11029425	14243544	(531.5921, 25295.057)(532.15076, 7351.1025)(533.16376, 3980.5352)(534.1664, 132.34)(513.93646, 50649.016)(514.36145, 15247.715)(515.36786, 3461.8389)(516.8992, 822.485)(571.5122, 3074.77)(570.1029, 131.5)(553.12866, 14805.113)(554.12946, 9633.61)(555.12787, 2288.51)(540.47, 4969.283)
Cinnamic acid	Phenolic acids	Hydroxycinnamic acids	4190227	1299714	5187724	1	1336688	6945107	3094985	2952390	2983448	4558026	1034933	1154441	(149.45486, 39869.21)(150.80917, 6128.12)(131.61942, 1437.7372)(132.716, 2320.6433)(149.05888, 69372.336)(150.06177, 8123.78)(131.0487, 56965.26)(132.0553, 7826.2134)(188.35005, 7205.74)(188.0163, 426.86)(189.0155, 1205.38)(173.10498, 13170.046)(174.0139, 50691.793)(174.05106, 4167.756)(175.0507, 9428.53)(154.6368, 3108.4517)(156.04031, 562395.94)(157.04346, 55136.703)
p-Coumaric acid	Phenolic acids	Hydroxycinnamic acids	10554764	8504651	8178312	2844370	33608904	37038376	28443160	27935016	23993912	5182762	5272253	5400124	(166.0507, 2297.0833)(147.03986, 1764.0502)(166.72678, 90677.31)(166.05734, 19568.256)(167.0664, 551.955)(148.046, 629888.0)(148.04591, 73552.83)(149.0502, 2508.87)(187.03899, 2196.7366)(188.0457, 208.215)(169.02376, 2418.474)
m-Coumaric acid / o-Coumaric acid	Phenolic acids	Hydroxycinnamic acids	10554764	8504651	8178312	1	33608904	37038376	28443160	27935016	23993912	1	1	1	(167.0534, 1309.8066)(168.06554, 3007.742)(147.0425, 785706.6)(148.04591, 73552.83)(149.0502, 2508.87)(187.03857, 2440.6387)(188.0457, 208.215)(169.02376, 2418.474)
Caffeic acid	Phenolic acids	Hydroxycinnamic acids	783906	1	1099449	10519322	12795392	11384066	13225769	11136343	1045820	11632794	6695211	9989338	(181.0495, 4392.9775)(182.71611, 1593.0166)(184.0563, 3294.39)(162.0353, 3443.47)(163.0403, 159.07)(181.19325, 30687.662)(183.05481, 20141.47)(185.0626, 19352.02)(186.0583, 20789.42)(163.33849, 351192.28)(164.34216, 34854.992)(165.54701, 3954.827)(224.01544, 12363.22)(205.99591, 281.72)(204.23714, 1278.8561)(186.3586, 35355.406)(188.03046, 4806.5947)
Ferulic acid / Isoferulic acid	Phenolic acids	Hydroxycinnamic acids	2401781	18462084	3207375	13128860	12789537	7241026	10615144	11321341	5863049	12457421	10196552	12074680	(194.55861, 25319.434)(196.06676, 5474.4927)(199.07292, 3622.0334)(177.05305, 1576.89)(195.06517, 87263.3)(196.0671, 13600.442)(197.0729, 2862.9248)(198.0773, 148.08)(177.05457, 139862.98)(178.05821, 18402.254)(179.0644, 2079.8)(234.13483, 5297.118)(236.0296, 2551.73)(216.1578, 2084.0188)(219.05214, 2070.0671)(221.05447, 1833.805)(220.0552, 92.61)(221.0601, 88.57)(200.70929, 4607.0884)(202.33328,…
Hydroxycaffeic acid	Phenolic acids	Hydroxycinnamic acids	1	1	1	22482564	30860862	50621736	44647556	43120272	44702824	1	13570850	13307605	(199.29132, 19677.207)(199.37614, 14451.609)(200.54404, 23608.93)(182.03217, 276.12668)(183.0365, 443.58)(199.0507, 3805.8)(181.16476, 8804.789)(183.44797, 17930.125)(184.0464, 7207.17)(237.43178, 2515.8286)(241.00288, 73094.15)(216.9863, 338.53)(219.02515, 1935729.8)(220.0289, 133788.23)(202.01877, 2573.8665)(204.69214, 3079.1533)
Caffeic acid ethyl ester	Phenolic acids	Hydroxycinnamic acids	1871886	670497	1	23292240	10472683	1	14709101	6448079	11887241	14555338	12840397	12769051	(208.0737, 6770.047)(191.06877, 9858.946)(192.73993, 889.6066)(194.40627, 335.71332)(209.0791, 391196.2)(210.08249, 49079.734)(211.0869, 7564.69)(192.07477, 30761.322)(193.41035, 6828.0996)(195.0754, 828.48)(196.0886, 192.96)(249.547, 301.57)(232.06064, 1258.47)(234.0726, 680.87)(214.0553, 997.39996)
p-Coumaric acid ethyl ester	Phenolic acids	Hydroxycinnamic acids	1	1	1	1	1	1	1	1	1	2212027	2413132	2301128	(213.025, 484.96)(175.07391, 36700.137)(176.0772, 4827.9917)(193.0822, 3648.7734)(194.0851, 634.05)
p-Coumaroyl glycolic acid	Phenolic acids	Hydroxycinnamic acids	257848	35580672	35325252	259408	288464	48576876	30800532	32657744	30448826	39235328	35891520	37785736	(222.30368, 311493.44)(224.0613, 141934.81)(225.06131, 23881.51)(226.06775, 1062.46)(206.80115, 689.165)(208.0482, 1680.5549)(223.05896, 916171.6)(224.06152, 104818.55)(225.05545, 349.81)(207.0578, 1564.9)(261.01492, 14713.823)(262.01743, 1750.114)(245.79366, 128066.43)(246.04308, 21159.621)(247.04669, 2205.2178)(227.02817, 2603.2788)(228.03255, 350.2133)
Sinapic acid	Phenolic acids	Hydroxycinnamic acids	1714404	161355	1525044	29076620	1	23996648	1148201	1201693	1073007	1654251	1472611	1554852	(224.66614, 6571.3975)(228.0745, 13032.596)(206.05943, 2432.7932)(207.0517, 9109.51)(225.85501, 8048.8613)(227.87778, 4597.6577)(230.0856, 7811.62)(207.70226, 17348.795)(208.64049, 5910.6997)(266.28796, 12013.273)(267.5362, 83106.234)(268.5376, 8640.97)(269.033, 4435.25)(246.52072, 617.06)(247.62856, 486348.25)(248.5634, 70590.63)(232.05528, 4713.0923)
p-Coumaroyl malic acid	Phenolic acids	Hydroxycinnamic acids	4990205	3294557	4587469	3336776	2779573	1136987	695752	626325	590105	1191298	2217462	2407698	(280.34616, 2811.0774)(262.7184, 2312.635)(283.1757, 15481.635)(283.73804, 281.22)(284.74088, 758.61993)(263.72275, 23599.729)(264.05927, 4345.162)(265.06494, 140.43)(320.91425, 1327.3689)(321.35898, 179.41667)(302.51566, 6101.5483)(302.01718, 1706.495)(303.01093, 1747.5901)(303.5035, 15344.8)(304.22333, 6602.2617)(306.05365, 3547.07)(287.04486, 83061.695)(288.26587, 10851.951)
Caffeoyl aspartic acid	Phenolic acids	Hydroxycinnamic acids	2037838	1	3056532	3162213	533002	642086	278409	259361	240218	1779087	2290297	1761435	(295.87234, 8595.68)(297.7456, 2932.2517)(299.08286, 373.28)(300.0766, 317.05)(278.81506, 5243.2773)(279.05963, 3954.755)(281.0623, 4784.03)(296.245, 4404.6865)(280.82593, 2564.8025)(281.73868, 2675.2466)(282.0759, 1106.12)(282.0765, 3734.97)(283.0864, 126.53)(334.53925, 3733.0625)(316.52887, 23279.719)(317.03314, 3145.44)(318.0264, 852.43)(319.56342, 6505.8496)(322.07205, 5829.4233)(323.0706, 26…
p-Coumaroyl tartaric acid	Phenolic acids	Hydroxycinnamic acids	832502	506580	595176	1	324358	494174	231170	160417	210276	687568	630326	651027	(297.056, 809.39667)(278.04022, 285.76498)(298.56796, 8052.58)(279.85153, 27356.312)(280.8544, 3482.392)(283.0658, 293.64)(338.02637, 586.43)(318.50522, 5647.2266)(319.0081, 19873.275)(320.01123, 1866.1034)(319.54318, 5745.385)(320.0382, 1743.98)(303.0372, 35085.77)(304.04306, 3769.7268)(305.03735, 442.54996)
Avenanthramide 2p	Phenolic acids	Hydroxycinnamic acids	1064988	1	786921	545210	368629	1	1	682280	219758	1	2301060	2309770	(299.93906, 3517.51)(301.8908, 1143.1079)(302.58997, 14655.02)(303.084, 27320.93)(281.06772, 2913.4133)(300.51984, 5282.062)(282.57788, 10468.673)(283.82852, 8000.611)(284.74716, 2507.8767)(286.58472, 4214.74)(287.0867, 7826.35)(340.71323, 4884.013)(342.0462, 2194.668)(342.38184, 1446.5834)(343.0535, 101.41)(324.03616, 1558.0267)(324.0285, 3472.24)(322.78122, 13265.406)(324.07526, 4340.48)(305.05…
Sinapine	Phenolic acids	Hydroxycinnamic acids	6057366	1	6644006	9361189	6018577	10793639	3093180	1	3784274	2520357	3749857	2496139	(310.83542, 2918.673)(313.01172, 2629.8665)(314.1808, 1224.7775)(292.1568, 184868.6)(293.1556, 29264.93)(294.1508, 1546.08)(311.4191, 3981.545)(313.1845, 3044.48)(314.1758, 3617.1)(315.1877, 2353.31)(293.16443, 78797.84)(294.16595, 13097.193)(295.1829, 779.69)(352.73096, 18308.355)(354.0117, 12722.671)(354.80508, 5219.9116)(355.13837, 1822.38)(335.35052, 7838.4053)(336.53314, 8557.723)(337.12506,…
Cinnamoyl glucose	Phenolic acids	Hydroxycinnamic acids	1825428	2044019	2148761	2938631	2729313	2454050	3504937	3589508	1	2707114	2199144	2490833	(311.4004, 7038.616)(313.51266, 7520.694)(314.36157, 4946.9976)(315.12253, 4803.34)(293.09613, 5122.746)(297.10565, 13334.835)(311.31967, 12929.964)(293.1058, 7619.448)(294.11584, 453.7)(349.06808, 33292.195)(350.07492, 4689.998)(351.08246, 938.545)(332.25848, 1013.4329)(333.0934, 22804.023)(334.10138, 3952.888)(317.08997, 2027.5544)(319.42383, 585.3133)
Caffeoyl tartaric acid	Phenolic acids	Hydroxycinnamic acids	233399	172590	185187	183898	270148	240805	254703	119006	236425	71334	735623	129379	(313.55075, 1088.605)(316.0664, 8358.27)(296.1833, 47042.55)(314.85638, 1291.2639)(315.55853, 3719.27)(298.85498, 8371.39)(300.0544, 12217.023)(351.01117, 4283.1914)(352.01187, 903.94336)(333.81485, 4398.536)(333.9974, 1785.39)(334.9946, 393.12)(336.0402, 4110.326)(336.0439, 497.5)(317.02286, 5320.759)(318.0178, 2003.4199)
Avenanthramide 2c / Avenanthramide K	Phenolic acids	Hydroxycinnamic acids	2574677	2255260	2211999	484930	498101	388002	465704	523376	1	593039	470784	1	(315.95062, 4953.3823)(318.41452, 4910.415)(320.0859, 737.99)(299.31787, 587.4325)(301.56995, 431.155)(302.0691, 892.51)(317.08636, 3947.368)(318.75278, 494.22336)(298.07748, 3554.173)(299.0761, 556.652)(300.0744, 76.42)(355.92776, 956.67554)(358.0458, 346.522)(360.04306, 560.055)(339.03348, 1592.9357)(338.26385, 4385.294)(339.73907, 950.92334)(341.06506, 1146.6951)(321.0555, 61425.555)(322.161, …
p-Coumaroyl tyrosine	Phenolic acids	Hydroxycinnamic acids	1056331	1305801	230600	1308022	839708	975219	862160	887517	708064	1184559	1190020	1299471	(327.11072, 10275.957)(328.11682, 1554.4155)(311.11084, 3148.585)(330.12662, 4546.4097)(331.1328, 3956.58)(333.1302, 3561.04)(312.61395, 7295.767)(313.3654, 1513.845)(313.7847, 3641.0369)(315.1219, 187.24)(366.67633, 753.19806)(351.06503, 18189.354)(352.0685, 2668.5728)(353.065, 136.33)(350.97632, 9562.043)(334.52887, 4140.7656)(334.4307, 1572.8867)
Feruloyl tartaric acid	Phenolic acids	Hydroxycinnamic acids	2181660	1905571	2359619	1	3204380	2537795	1	1	1	1	2202802	1834721	(327.94586, 5384.5)(328.5667, 721.8775)(310.0529, 27929.773)(311.06793, 19200.012)(312.07062, 5289.4053)(327.07587, 2184.255)(328.0834, 329.97)(310.31677, 9333.522)(311.31522, 39786.848)(312.31885, 7414.5674)(313.31848, 2465.4375)(314.07755, 655.405)(365.0237, 97.94)(349.01758, 10026.261)(350.01895, 1221.5)(349.4328, 10698.026)(350.5637, 6213.625)(352.56378, 2683.285)(353.5625, 4645.78)(354.0715,…
p-Coumaric acid 4-O-glucoside / p-Coumaroyl glucose	Phenolic acids	Hydroxycinnamic acids	1541753	1	1397108	1621027	1451772	1387524	1	1	1	1	1	1	(328.9077, 1094.896)(329.1063, 1121.6366)(308.25415, 10544.079)(309.0881, 5242.33)(328.1159, 2470.98)(329.1122, 954.77)(311.10745, 832.4634)(351.0892, 7884.6445)(352.09818, 755.01404)(332.22452, 46984.344)(332.08417, 12538.795)(333.08417, 3009.585)(334.0973, 207.61)
3-p-Coumaroylquinic acid / 4-p-Coumaroylquinic acid / 5-p-Coumaroylquinic acid / p-Coumaroylquinic acid	Phenolic acids	Hydroxycinnamic acids	4252681	3438041	3177584	50376212	51821288	50137896	126882944	136898544	129863520	109210392	133083664	108446536	(341.61017, 562.985)(343.1074, 2480.63)(324.09464, 4307.7534)(325.10406, 1988.499)(343.11502, 361.92334)(323.1085, 174.95)(380.8136, 23679.24)(381.06653, 2009.7333)(383.0701, 372080.94)(361.08835, 2978286.0)(362.09164, 568601.06)(363.0941, 95940.125)(364.09695, 15454.17)(344.09122, 4284.11)(345.59152, 748.1567)(348.0857, 531.37)
Caffeic acid 4-O-glucoside / Caffeoyl glucose	Phenolic acids	Hydroxycinnamic acids	1	1	430694	1275039	1075915	1132241	1761293	1816585	1946829	2866007	2858420	2746919	(343.76855, 409.97665)(326.0894, 4350.78)(329.0961, 380.06)(343.11032, 3790.9202)(344.1169, 1324.69)(345.127, 248.42)(327.43018, 3746.1787)(329.1096, 432.1)(367.08392, 9346.33)(368.42493, 1221.8022)(369.10114, 2681.8801)(347.07275, 60326.82)(348.07715, 10997.627)(349.07993, 1665.2461)
3-Caffeoylquinic acid / 4-Caffeoylquinic acid / 5-Caffeoylquinic acid	Phenolic acids	Hydroxycinnamic acids	1092399	1137529	1088954	1	480724	503098	2712527	1	1565907	8996614	8622839	11778840	(355.09927, 153721.75)(356.10352, 27583.033)(357.1087, 3880.0)(336.9195, 17977.402)(337.08957, 4861.39)(338.0904, 234.37)(360.1069, 225.97)(337.80893, 23260.25)(338.81598, 8311.034)(340.1087, 5170.95)(393.0601, 10054.747)(394.0601, 152.55)(377.4538, 8869.964)(380.06192, 1798.6567)(377.08496, 53489.793)(378.08505, 18831.32)(359.0713, 3241.3684)
Avenanthramide 2f	Phenolic acids	Hydroxycinnamic acids	1	1	1	1	1	1	639358	690786	705714	1	1	1	(356.0569, 1471.5767)(312.0878, 8041.69)(313.0795, 342.16)(329.09753, 25020.928)(330.1025, 4521.52)(337.0825, 4714.66)
Ferulic acid 4-O-glucoside / Feruloyl glucose	Phenolic acids	Hydroxycinnamic acids	4202500	3219223	2938393	50040240	52006188	50131424	126806680	137166080	129075232	108419568	132262624	108211456	(356.51923, 1021.234)(342.11166, 530.77997)(343.1074, 2480.63)(357.95932, 1079.8284)(343.11523, 309.7)(401.07877, 481.4886)(380.8136, 23958.068)(381.06653, 2009.7333)(383.06995, 384953.22)(382.10327, 2110.285)(361.08835, 2979121.8)(362.09164, 568773.44)(363.0941, 95968.6)(364.09695, 15454.17)
3-Feruloylquinic acid / 4-Feruloylquinic acid / 5-Feruloylquinic acid	Phenolic acids	Hydroxycinnamic acids	701054	1	560590	4185878	3265838	3086346	1	1	4894228	9354929	1	1	(369.11172, 134514.78)(370.11664, 23972.135)(373.1269, 1771.0339)(352.77173, 8598.11)(352.77548, 2422.72)(353.1228, 2184.55)(407.06723, 2370.8567)(393.4768, 1015.82996)(394.07687, 707.95996)(395.0837, 3466.6833)(391.09827, 4742.42)(375.53268, 46522.395)(376.52954, 10508.854)(377.5327, 3747.0017)(378.10614, 4709.32)
5-8'-Dehydrodiferulic acid / 8-O-4'-Dehydrodiferulic acid	Phenolic acids	Hydroxycinnamic acids	950689	1136895	1	1624170	1597662	1590658	3875063	4430292	4421330	9830485	8356491	8376515	(386.34625, 5010.66)(387.34247, 1322.725)(389.1168, 662.36)(391.1236, 135.49)(371.1019, 7148.98)(372.0999, 434.22)(373.1099, 241.0)(389.00076, 10451.555)(389.1142, 3110.0437)(389.61856, 397.235)(369.98846, 10640.714)(371.60947, 1588.295)(427.73862, 2991.5698)(409.0603, 747.56)(409.43073, 8737.09)(410.1021, 2036.8679)(411.09528, 494.01)(392.92038, 1905.4049)(395.0844, 3611.4)
3-Sinapoylquinic acid / 4-Sinapoylquinic acid / 5-Sinapoylquinic acid	Phenolic acids	Hydroxycinnamic acids	1	247965	10418267	1494664	1580311	1790276	552486	615446	433879	1113583	1714201	1059622	(401.52484, 72070.0)(402.45923, 6010.547)(403.13235, 8784.11)(384.32123, 4091.2239)(382.1227, 798.11)(399.13855, 60069.918)(400.13794, 21911.512)(385.1236, 1187.4)(437.2812, 12834.432)(438.08572, 2725.5244)(419.07043, 15263.522)(420.07385, 2425.675)(421.0782, 306.075)(423.22794, 1183.54)(425.55106, 1541.3601)(426.12042, 876.1975)(405.10748, 6176.959)(406.11154, 1665.4884)(408.10754, 537.765)
Chicoric acid	Phenolic acids	Hydroxycinnamic acids	191268	1	185576	289038	296618	209305	162899	170196	183475	258809	214790	231660	(474.41092, 3258.28)(475.07996, 2515.8867)(476.0861, 716.75)(457.07053, 4729.407)(459.0719, 22338.273)(460.07617, 4021.8)(478.0948, 1103.29)(457.07507, 6576.375)(458.0715, 2174.36)(513.0554, 361.32)(495.0299, 4812.8003)(496.0196, 344.12)(499.98718, 7380.701)(499.88226, 5559.6665)(501.08405, 1355.02)(482.19968, 4594.9746)(483.24283, 1576.9899)(484.07755, 1900.4266)
3,4-Dicaffeoylquinic acid / 3,5-Dicaffeoylquinic acid / 4,5-Dicaffeoylquinic acid	Phenolic acids	Hydroxycinnamic acids	887557	627807	617785	446493	426071	415014	679388	576186	609965	17548640	3280177	16568093	(517.37775, 41619.523)(519.1321, 11022.492)(519.13306, 5907.34)(499.1222, 266.25998)(503.12375, 496.29004)(504.1346, 811.45)(520.1578, 1232.7)(499.1193, 227436.45)(500.12283, 61645.02)(501.11838, 16770.863)(502.11218, 5150.785)(555.4251, 4315.317)(556.0895, 184.56)(537.076, 11497.526)(538.07935, 1863.1499)(539.0689, 1010.02)(539.8615, 18380.611)(540.8162, 6271.691)(541.1034, 3879.04)(521.103, 131…
3,4-Diferuloylquinic acid / 3,5-Diferuloylquinic acid	Phenolic acids	Hydroxycinnamic acids	3248631	3255247	3195295	466761	730345	669799	3500093	2257827	2167265	5419961	4220140	4792686	(545.1603, 20478.553)(546.1647, 6686.623)(547.5081, 1679.8732)(549.6851, 559.7)(550.1785, 338.18)(551.1863, 1004.05)(528.1529, 37969.555)(528.1534, 14314.934)(529.16724, 5036.6733)(530.1806, 258.69)(583.54816, 4796.129)(585.1299, 1867.7799)(587.1301, 48189.098)(588.1338, 14260.989)(589.1331, 3093.7969)(567.146, 25760.586)(568.15, 5222.1323)(569.1464, 1096.6234)(549.14935, 3068.2068)
24-Methyllathosterol ferulate / 24-Methylcholesterol ferulate / 24-Methylenecholestanol ferulate	Phenolic acids	Hydroxycinnamic acids	2079877	1837793	1890417	2313302	2366179	2152063	1771923	1836749	1875635	1	1	1	(579.2933, 52589.72)(580.2796, 13710.814)(581.4228, 458.78003)(559.91327, 25045.373)(561.0875, 3022.5046)(579.4158, 548.42)(562.6722, 4131.718)(616.1829, 2716.6692)(620.74023, 20607.5)(621.4105, 7434.01)(603.1776, 895.06805)(603.88837, 10615.285)(602.40967, 19899.373)(603.75085, 3315.871)(601.4294, 452.85)(582.3957, 23892.303)(584.1507, 10913.697)(585.408, 12391.13)(586.0808, 20759.521)(587.4011,…
24-Methylcholestanol ferulate	Phenolic acids	Hydroxycinnamic acids	1344366	1248660	1280138	3204453	3311968	7102102	2663288	895543	1	2382393	1239629	988437	(582.0128, 10642.383)(580.4231, 15934.36)(582.4489, 485.65)(561.9833, 5662.6045)(561.42883, 4038.26)(562.4304, 1257.73)(580.4526, 1344.62)(563.42096, 2366.09)(618.12964, 6217.844)(618.4034, 2678.988)(619.4008, 507.96402)(600.193, 3047.6028)(604.9109, 2223.47)(606.3932, 6951.86)(602.7934, 9692.757)(605.1505, 8337.119)(606.44495, 13318.157)(585.4163, 13519.71)(588.26337, 5007.1265)(589.439, 3573.74)
Schottenol ferulate / Sitosterol ferulate	Phenolic acids	Hydroxycinnamic acids	3709385	3137366	3261187	2742017	2830358	3185481	2985000	2977644	2625602	5057312	5187175	1	(590.4166, 137.685)(572.4355, 8297.572)(594.91864, 11307.633)(595.714, 23160.037)(595.4525, 15678.16)(595.4564, 2814.06)(573.4271, 94509.26)(574.42944, 30245.625)(575.43054, 5470.258)(635.41437, 2007.4733)(636.4257, 95.76)(613.06195, 3849.327)(614.0586, 2301.4255)(616.3093, 30100.383)(618.446, 21353.459)(619.19196, 11939.768)(619.4256, 4319.53)(599.05347, 8662.142)(600.7548, 7970.03)(601.4486, 83…
Stigmastanol ferulate	Phenolic acids	Hydroxycinnamic acids	1959907	1911107	2360960	558965	1658083	902344	1414021	830575	1459416	1	119073	129321	(595.46967, 14424.609)(596.47363, 4538.7437)(574.4252, 25424.857)(575.42706, 6503.8545)(576.42694, 232.95251)(597.47095, 23079.734)(598.474, 9780.075)(599.4795, 1382.065)(635.5155, 16714.504)(636.7576, 6782.3145)(635.926, 7283.952)(637.0998, 2928.6267)(638.42755, 657.29)(614.1565, 343.9625)(614.4102, 279.1)(615.99896, 23642.21)(617.305, 20479.484)(618.95605, 21376.955)(619.4569, 6760.26)(599.9198…
2-S-Glutathionyl caftaric acid	Phenolic acids	Hydroxycinnamic acids	1	192318	85923	259857	272324	458948	241366	229259	251393	258613	218526	221606	(618.4539, 5369.567)(601.10596, 896.84406)(603.1136, 452.03665)(619.13116, 8475.977)(601.9144, 4810.716)(602.6201, 3148.955)(603.78076, 17221.13)(604.78705, 4807.4766)(605.11707, 43161.65)(606.1207, 13695.385)(640.5762, 3282.6)(643.0715, 2766.92)(622.0986, 7290.64)
Verbascoside	Phenolic acids	Hydroxycinnamic acids	5118616	4452624	5650824	3027408	2395847	2043282	1217561	1231304	1267466	1571115	481146	1568037	(624.8219, 16324.291)(626.0366, 6255.5337)(627.2002, 1057.928)(606.8654, 2414.1064)(607.2082, 114830.445)(608.21136, 36731.754)(609.21405, 9776.964)(610.21967, 1387.1683)(652.52985, 3012.915)(653.19934, 1772.435)(635.20386, 1962.4967)
1,2-Diferuloylgentiobiose	Phenolic acids	Hydroxycinnamic acids	1	1	1	620883	676675	857464	2357780	1609551	1218703	268737	4379059	232951	(697.224, 2871.85)(698.2286, 712.93)(699.2071, 740.71)(678.54663, 834.54004)(697.9801, 3004.8086)(699.2277, 5657.596)(699.2117, 861.41003)(678.00964, 5847.08)(678.2077, 1959.9767)(733.16797, 2991.336)(734.1709, 1436.69)(735.1689, 262.34)(722.17303, 724.0833)(717.19366, 39884.277)(718.1972, 13394.322)(719.19476, 4646.84)(720.1953, 1222.125)
1-Sinapoyl-2-feruloylgentiobiose	Phenolic acids	Hydroxycinnamic acids	1	1	1	1	1	1	1	1	1	846507	693678	1	(724.2108, 1012.1)(769.19977, 878.9)(770.201, 245.135)(750.2261, 3904.49)(751.2264, 2040.78)(752.22, 326.09)(731.1983, 621.785)(732.2007, 461.5)
1,2-Disinapoylgentiobiose	Phenolic acids	Hydroxycinnamic acids	1013721	1	1009052	1	1100603	1	1040692	1	1081309	1	97341	107624	(793.208, 402.04498)(780.04095, 22264.92)(782.1791, 21159.77)(777.5078, 13204.284)(759.2118, 732.725)
1,2,2'-Triferuloylgentiobiose	Phenolic acids	Hydroxycinnamic acids	305734	312841	313571	378812	381192	371266	347325	349674	375951	302195	372081	256860	(852.2404, 13633.415)(853.2398, 6279.5273)(854.23865, 2127.475)(879.26996, 934.1589)
1-Sinapoyl-2,2'-diferuloylgentiobiose	Phenolic acids	Hydroxycinnamic acids	362156	1	291660	259979	386418	358140	1	374314	1	73983	69341	1	(883.26904, 6623.9805)(883.2671, 5493.144)(884.2692, 346.1775)(939.2473, 1197.0701)(923.2611, 2317.055)(924.2628, 2142.445)
1,2'-Disinapoyl-2-feruloylgentiobiose	Phenolic acids	Hydroxycinnamic acids	1	1	1	1	1	1	1	1	1	118413	106480	118799	(912.2771, 5561.9067)(913.2791, 3551.2966)(935.2468, 683.48663)
2,5-di-S-Glutathionyl caftaric acid	Phenolic acids	Hydroxycinnamic acids	140460	166838	178035	249036	238812	248064	263285	255840	274469	1	1	1	(923.20245, 722.09)(929.2162, 20390.309)(929.21545, 16578.463)(930.21533, 13926.787)(945.1901, 8257.631)(946.1892, 6631.129)
1,2,2'-Trisinapoylgentiobiose	Phenolic acids	Hydroxycinnamic acids	262843	263083	270881	423816	431748	429983	1	462107	467715	418449	1177227	1316022	(999.77814, 11248.513)(986.9799, 4963.075)(983.2564, 10608.711)(984.2554, 5651.88)(985.24817, 1642.65)
scopoletin	Phenolic acids	Hydroxycinnamic acids	150904000	140312256	137542880	240364480	239793664	256910912	203270768	201693376	198959104	222541728	205311184	215873280	(192.03996, 25569.604)(176.03735, 1131.1334)(193.04803, 5275280.5)(194.05115, 569182.25)(176.04448, 2001.0779)(231.00288, 6634.4253)(215.02946, 374206.78)(216.03258, 39573.062)(217.0363, 4419.29)(201.0358, 1483.71)
scoparone	Phenolic acids	Hydroxycinnamic acids	431375	374770	197156	203744	1148918	558123	680093	735079	761261	1867958	1474730	796917	(208.0605, 8093.345)(208.56375, 557.935)(209.066, 394.55)(189.29698, 5785.455)(192.0613, 200.11)(207.17737, 18007.63)(208.23485, 2690.8115)(192.06422, 2297.6482)(192.56349, 1424.3018)(193.56865, 3360.04)(247.45149, 3394.0156)(246.02545, 129.485)(247.0185, 74.97)(230.0166, 4336.451)(228.01048, 1348.2925)(231.25345, 2856.9192)(233.057, 8548.465)(213.4723, 3814.2688)(214.54568, 30424.252)(215.80042,…
4-Hydroxyphenylacetic acid	Phenolic acids	Hydroxyphenylacetic acids	5291612	2595746	1793369	1642345	1096313	1326777	1503139	1068144	2701903	3228975	3613594	3380530	(153.5531, 18934.066)(154.05301, 3757.615)(155.0569, 505.48)(136.04124, 379193.94)(138.71883, 58505.484)(139.0522, 12392.1)(153.55582, 27341.865)(154.0551, 4832.825)(135.04353, 40699.453)(136.04982, 5675.5366)(192.26056, 7419.968)(194.51225, 197.445)(173.66927, 878.5833)(174.99756, 136273.62)(177.0026, 12609.75)(177.04445, 1936.3824)(161.2371, 3767.1636)(162.03964, 2538.49)
Methoxyphenylacetic acid	Phenolic acids	Hydroxyphenylacetic acids	1	1	755557	2682668	1984003	1	1	1	1	1	1	1	(170.0731, 1283.23)(149.0528, 13385.425)(167.07076, 18897.74)(168.07167, 910.2067)(169.0626, 158.64)(149.05984, 6756.4697)(150.0653, 1165.49)(207.02303, 3374.0732)(187.0179, 313.66)
Homovanillic acid / Dihydrocaffeic acid	Phenolic acids	Hydroxyphenylacetic acids	3337585	2869952	3094039	54800540	41780516	1	1	53293040	41059372	65944484	52092848	58738596	(182.72697, 8843.93)(185.064, 13826.98)(186.06424, 4040.54)(187.07059, 447.41498)(164.0445, 3327.3525)(183.06361, 1716442.0)(184.067, 160868.28)(165.05356, 131848.1)(166.05743, 12844.812)(167.0664, 576.88)(222.03, 359.23)(208.0171, 100.3)(205.05173, 1327.5144)(190.04857, 9977.718)(191.04523, 4328.0464)
Homoveratric acid	Phenolic acids	Hydroxyphenylacetic acids	565113	611444	3986342	3033013	3788641	2737621	1453539	1852380	1803720	4623596	2051375	4459198	(196.64487, 3938.127)(198.58078, 497.60248)(201.08676, 965.245)(178.84332, 8067.584)(182.0757, 40075.73)(197.74846, 2241.2534)(199.5873, 4417.3203)(201.08725, 689.78)(202.0913, 305.435)(179.67093, 23992.223)(180.67433, 11126.333)(183.08327, 35965.668)(184.0868, 1530.22)(237.83682, 1557.448)(219.0279, 166.45)(219.22948, 17401.822)(220.40125, 3935.2014)(201.77931, 2626.6592)(205.0639, 284.24)
Dihydro-p-coumaric acid	Phenolic acids	Hydroxyphenylpropanoic acids	1	1	755557	2682668	1984003	1	2660962	2825376	2702851	1264510	1119180	1200481	(170.40648, 1218.8483)(171.076, 950.4)(149.0528, 13385.425)(167.47322, 11635.744)(168.07167, 910.2067)(169.0626, 158.64)(149.05875, 67674.76)(150.06227, 7191.2)(207.02303, 3374.0732)(187.0179, 313.66)(194.06892, 3368.3325)
Pinosylvin	Stilbenes	Stilbenes	7249027	2599223	6892008	771470	1	2831238	495069	1008826	464959	438351	525153	3794280	(212.0838, 6329.94)(194.43732, 15833.207)(196.07518, 4503.6167)(197.32848, 346.12)(216.81801, 1757.65)(197.08737, 11292.714)(197.0885, 348.705)(253.44609, 4927.3564)(256.0549, 3376.0156)(257.05927, 8074.835)(234.18462, 39096.46)(234.04391, 3775.9922)(235.03816, 6399.7905)(236.71474, 10017.649)(237.93848, 1931.2786)(238.08035, 1092.218)(240.0883, 522.81)(217.60968, 5852.529)(219.06224, 6163.148)(2…
Resveratrol	Stilbenes	Stilbenes	647265	1384603	717331	2508395	2152553	1346457	4219174	4123378	4161453	3441215	3673616	3833131	(229.80922, 2665.4072)(230.0804, 2397.7)(210.87032, 6680.646)(213.57678, 8560.9795)(214.076, 1014.28)(215.0857, 730.84)(230.75526, 800.94336)(230.0831, 444.84)(211.27473, 4647.753)(213.07222, 555.35803)(215.0913, 7851.12)(216.0946, 406.08)(269.3176, 3356.6733)(273.05325, 3210.0552)(252.28734, 1236.045)(254.31505, 7220.5327)(252.2414, 1350.6193)(255.70332, 8436.293)(233.05705, 33774.69)(234.17062,…
Piceatannol	Stilbenes	Stilbenes	1	947121	624923	2518807	2352887	2079876	1837294	1514185	1595532	1	1	1	(245.20128, 61992.914)(246.07973, 10506.317)(228.56464, 2400.0698)(231.0815, 3583.5)(230.0855, 2021.49)(231.0844, 649.02)(283.02917, 14101.853)(265.6898, 22193.18)(267.69504, 3422.82)(267.011, 1773.94)(268.07205, 356.89502)(271.0783, 293.59)(251.39479, 51843.168)(252.06015, 15858.865)(253.0568, 13252.05)
Pterostilbene	Stilbenes	Stilbenes	4832738	4026456	4363761	927288	1	2731369	2633077	3850103	1	1216340	2699718	898786	(257.91388, 186134.62)(259.11716, 12260.958)(260.115, 511715.8)(261.1176, 31965.52)(239.34863, 17658.438)(239.76497, 10130.087)(258.2652, 3862.6702)(258.79086, 5972.9263)(240.61157, 11030.339)(242.11768, 10745.373)(242.116, 11722.086)(243.114, 4574.685)(298.85437, 7203.1997)(298.57727, 748.3925)(300.33313, 1410.0125)(301.08255, 1539.5468)(279.20657, 2239.8628)(279.3989, 2925.1865)(279.9999, 65723…
Piceatannol 3-O-glucoside	Stilbenes	Stilbenes	3504251	3030931	2956929	37484332	39008032	38650280	61281288	63498316	62519036	48639252	50658752	49218932	(389.11917, 1067041.8)(390.1226, 215442.19)(391.12503, 37300.26)(392.1282, 5496.1465)(427.0741, 18964.295)(428.07755, 3950.399)(429.075, 1051.34)(431.13208, 1253.7367)(411.10086, 241592.48)(412.10388, 52476.89)(413.1063, 10001.967)(414.10977, 313.97668)
Resveratrol 5-O-glucoside / Resveratrol 3-O-glucoside	Stilbenes	Stilbenes	908042	627273	986066	1516351	1	1212033	1651257	1759471	2040297	5861889	5238623	4137603	(391.13635, 2475.3535)(392.63416, 2393.77)(394.1465, 171.49)(373.72928, 3449.5437)(392.28375, 3996.5144)(393.64072, 2040.8875)(374.12985, 7694.845)(375.3402, 2840.054)(433.90244, 7593.331)(411.08408, 2762.21)(413.21967, 18618.975)(414.22403, 3731.0996)(416.1331, 1338.51)(397.61664, 457.05)
Pallidol / d-Viniferin / e-Viniferin	Stilbenes	Stilbenes	439796	486671	1	268844	298701	1	243349	500911	1	1	1	1	(454.80225, 841.50665)(458.15405, 2367.8599)(459.15527, 484.35)(436.12762, 810.095)(458.49048, 1182.1934)(458.16095, 1181.0599)(459.1722, 2230.32)(460.1728, 463.48)(461.164, 1814.94)(438.13968, 11336.883)(439.90036, 4550.06)(441.48877, 4289.3965)(443.1507, 504.26)(498.11966, 2296.8467)(499.1078, 2127.5)(477.60846, 2959.0127)(476.0964, 222.42)(478.47168, 2649.32)(481.8153, 7045.654)(481.1492, 5502…
alpha-Terpinene	Terpenoids	Monoterpenes	14003334	19699212	19752760	14776102	11551929	8745819	16228270	13804711	17795422	9941959	1	9546661	(137.1312, 492079.28)(138.13426, 53323.13)(139.13762, 1283.6045)(175.99545, 9770.3)(177.51913, 5715.15)(179.76106, 623.5467)(159.1151, 183385.5)(160.11845, 25451.543)
Artemisinin	Terpenoids	Sesquiterpenes	4369448	1578465	1	3332094	3130295	3228605	3348926	3894155	2145592	21736495	28745458	28933614	(262.98068, 74300.516)(264.12985, 14223.144)(245.11423, 45887.01)(246.11717, 7518.73)(263.125, 925021.56)(264.13074, 129999.0)(245.11285, 19102.158)(246.11726, 3966.022)(301.75534, 7706.9165)(303.08447, 1256.335)(287.0721, 4752.46)(285.61136, 14331.755)(286.11047, 4914.945)(269.6036, 27262.098)(269.1013, 9835.65)(272.1136, 3287.29)
Arteannuic alcohol	Terpenoids	sesquiterpenes	1	1	10225456	8156603	3373969	10709527	9694023	9483609	9342883	10084938	11938463	9121535	(221.18724, 77708.38)(222.19054, 11660.966)(223.1931, 221.81999)(203.17728, 253811.17)(204.18042, 40048.492)(205.18762, 2111.6626)(262.1507, 14437.428)(262.98022, 9086.187)(262.8162, 13120.394)(263.81876, 11332.633)(264.1532, 5758.07)(265.1543, 141.12)(243.25684, 7701.674)(244.51466, 10092.36)(245.85751, 4457.9443)(246.14584, 2041.85)(243.83699, 12476.86)(225.1676, 125.82)
Abscisic acid methyl ester	Terpenoids	sesquiterpenes	17873924	15833261	13119550	16822188	18068160	17151332	10255970	9748860	9873078	7950271	5352128	7229165	(262.1402, 1175.9401)(301.13806, 192822.36)(302.14023, 39917.3)(303.1428, 4887.362)(263.15573, 1090.0333)(264.15112, 144.835)(266.16913, 9472.54)(317.11258, 19495.219)(318.11487, 2189.161)(319.10782, 1123.155)(279.15604, 41430.25)(280.15933, 6812.9434)(281.15625, 668.10333)
7,11-dimethyl-3-methylenedodeca-1,6,10-triene	Terpenoids	sesquiterpenes	1124518	1199692	1381459	1	1788649	2697735	1	1132627	1786535	6441279	6462046	3007046	(205.19081, 11313.911)(206.19548, 3000.21)(205.19252, 93616.94)(206.1959, 15037.13)(245.14844, 40881.52)(246.37486, 8164.356)(247.30515, 2782.7559)(248.16055, 606.4)
Nerolidol / Cedrol	Terpenoids	sesquiterpenes	3641042	2184285	2152027	5792892	8206967	7979523	17789498	6474384	4451407	7004246	7084538	3291669	(223.20175, 3398.188)(205.1906, 155.8)(205.19229, 56866.71)(206.19565, 8527.02)(263.66296, 22235.174)(265.1673, 6920.89)(265.97113, 45019.746)(266.17188, 173994.9)(267.1693, 22644.31)(244.65045, 33745.156)(246.55505, 8696.021)(247.495, 3914.2883)(248.1614, 1727.05)(245.18332, 271789.03)(246.1795, 52621.93)(227.17278, 219257.2)(228.17429, 32499.059)
arteannoide H	Terpenoids	Sesquiterpenes	6827406	6937278	1	18271540	147449856	21051488	199302368	182812352	192763273	14601035	14852308	13436249	(231.13586, 1171184.1)(232.13887, 185985.9)(213.12569, 146311.0)(214.12796, 22608.018)(233.15059, 90195.54)(234.15353, 15198.638)(215.13925, 21767.494)(216.13931, 5304.8726)(275.1076, 3495.166)(276.10724, 16111.065)(256.10025, 1338.99)(258.0954, 457.71)(254.79924, 12956.379)(256.1356, 2501.5117)(258.1453, 176.19)(238.12018, 2224.53)(238.1181, 1424.95)
artemisinic acid(arteannuic acid)	Terpenoids	Sesquiterpenes	15765132	13226223	13677857	9852773	1	10603961	12678207	25448938	6292976	6184286	22156060	53651350	(235.1661, 161991.83)(236.16922, 26028.105)(217.1542, 74978.34)(218.157, 12591.05)(217.15607, 102096.83)(218.15695, 15197.177)(275.62573, 39241.027)(276.68616, 9226.246)(278.13907, 27182.035)(278.5394, 12750.982)(279.14066, 6693.9937)(255.82973, 5574.4585)(258.6214, 3545.74)(257.1482, 107718.54)(258.15216, 24093.396)(239.97496, 1212.0734)(240.6505, 458.455)
arteannoide Q/R	Terpenoids	Sesquiterpenes	5016987	1	2683907	4964044	4728823	3927732	11697665	7676839	9296881	3349894	2730596	3082030	(247.12978, 152121.94)(248.13116, 27304.39)(229.37128, 58853.71)(230.37273, 12805.604)(249.14516, 136328.1)(250.14693, 26023.312)(252.65186, 715.265)(231.13527, 172560.1)(232.13516, 35639.46)(234.1425, 828.48)(288.09726, 19301.219)(292.10275, 8892.93)(270.08914, 832.298)(274.0922, 210.25)(270.2501, 6016.8496)(272.1312, 20294.2)(254.71939, 1797.8699)(257.1264, 7044.33)
arteannuin B	Terpenoids	Sesquiterpenes	23577126	204759433	202959136	106040216	173757360	170161024	359634240	374888352	344365760	383794656	390779648	382114576	(248.59526, 270346.66)(250.14896, 93540.336)(230.1257, 4694.1)(249.14629, 1485396.4)(250.14949, 234496.14)(231.13583, 2162586.2)(232.13896, 339185.72)(288.74255, 378725.28)(288.10513, 94403.1)(271.59995, 24726.176)(270.1015, 6217.14)(271.12845, 1928770.5)(272.1328, 327827.38)(253.93892, 16731.924)(255.00258, 4189.94)(257.63345, 359.825)
arteannoide I/N/F	Terpenoids	Sesquiterpenes	17798596	17637336	17564084	59260940	20769048	1	156671616	264897216	29335452	13546129	35456796	12888991	(249.14601, 536131.5)(250.14897, 86857.46)(231.13574, 850680.8)(232.13844, 137417.06)(251.1611, 144818.38)(252.1629, 24795.09)(253.66705, 6419.475)(254.1668, 717.94)(233.15096, 286435.3)(234.1537, 46453.02)(289.56555, 37409.86)(293.37305, 13524.221)(292.1191, 640.66)(294.1298, 1573.24)(274.27182, 3736.3916)(276.1071, 15391.46)(272.4082, 228278.3)(274.14456, 70234.336)(254.799, 3361.079)(256.33517…
arteannoide G/J/L/P	Terpenoids	Sesquiterpenes	44991412	27793864	54975880	28721528	25647268	15791594	16910690	13755285	15152986	18914898	61342356	24348856	(251.16136, 239364.73)(252.16327, 41192.78)(253.16023, 4867.252)(233.15126, 710305.5)(234.15411, 113118.97)(253.25725, 38715.12)(255.34662, 21424.236)(255.38008, 6270.068)(256.1834, 8004.293)(257.188, 1941.07)(235.16542, 116479.24)(236.16844, 19041.361)(293.21344, 7424.603)(295.8855, 7420.695)(296.13425, 10136.779)(275.66592, 47596.895)(278.1328, 12060.21)(274.73572, 100617.02)(256.8123, 17147.05…
arteannoide K	Terpenoids	Sesquiterpenes	3151514	3173160	1	2450941	2373298	1755398	315056	329277	796597	637133	1051195	1584797	(261.60776, 4133.517)(263.85577, 9700.572)(243.36288, 10785.246)(244.87248, 19166.8)(245.76349, 18729.838)(246.09674, 9752.775)(262.1063, 962.70593)(242.76685, 41839.797)(243.0999, 18297.23)(301.3488, 825.85)(302.39835, 1939.38)(303.06512, 2708.705)(281.05246, 8148.2905)(284.0587, 2638.96)(282.1743, 16343.828)(283.20938, 5030.806)(284.08936, 1067.1333)(265.96765, 31022.785)(266.58725, 47162.24)(2…
deoxyartemisinin	Terpenoids	Sesquiterpenes	155754280	152830768	157236720	158339552	177304800	174023792	137373408	134905232	138938104	133548684	139497412	137479864	(266.73495, 732074.94)(268.16, 195046.11)(269.36224, 29620.85)(270.15906, 2828.005)(248.33609, 42184.1)(250.1482, 21163.31)(267.15668, 1445263.6)(268.16006, 226655.58)(269.162, 43556.043)(270.15308, 3421.5552)(249.14601, 282816.97)(250.14886, 47430.047)(305.36606, 147823.56)(306.57224, 25642.713)(308.11365, 2944.8298)(311.1162, 705.75)(289.29202, 23762.148)(288.11035, 4664.847)(289.13834, 1866769…
arteannoide M	Terpenoids	Sesquiterpenes	62263160	59252908	63872304	3966725	1	11529428	5033373	5632704	7705175	8299644	8063953	11101433	(273.14297, 520802.6)(274.1444, 85874.29)(255.33694, 76965.875)(256.38965, 16485.299)(275.15906, 881.8525)(278.17206, 5352.145)(256.98077, 57231.176)(258.15137, 10946.036)(317.11966, 10074.542)(318.12064, 2654.4966)(297.60638, 1958.2175)(297.03766, 1669.782)(298.6492, 1042.5199)(300.39862, 2294.14)(279.7341, 3964.0457)(281.8906, 902.97754)(283.1471, 1170.91)
Artemisitene	Terpenoids	sesquiterpenes	1	1574563	1	6633156	4905546	9464847	5192726	4440000	3672196	1701429	2091081	5562970	(280.8347, 46733.156)(281.99475, 9877.619)(283.1323, 391.85)(263.1235, 44884.63)(264.1295, 9472.09)(281.13464, 38267.99)(282.13486, 6512.5596)(263.1247, 78253.12)(264.12677, 11278.13)(321.29825, 8008.8086)(320.0949, 3047.92)(321.094, 393.86)(302.0934, 4131.25)(303.11954, 34520.98)(304.12735, 8419.481)(285.33347, 6214.748)(286.1156, 1407.78)
Dihydroartemisinin	Terpenoids	Sesquiterpenes	141810128	139640416	143386352	160824512	154578072	162863808	124691904	134479888	138290520	126158282	129388721	128410028	(284.2983, 32208.213)(285.15237, 5370.019)(286.1569, 268.64)(266.2891, 142449.17)(268.1604, 110985.14)(269.1656, 20544.79)(270.1627, 421.22)(285.1657, 344.97)(267.1567, 1746377.0)(268.16034, 273135.7)(269.16177, 36647.34)(270.15695, 3120.36)(324.97614, 3026.9646)(326.12894, 796.305)(305.48035, 109203.32)(306.36612, 23199.314)(307.11475, 7069.8604)(307.14914, 14131.856)(308.1475, 3317.0852)(289.13…
arteannoide O	Terpenoids	Sesquiterpenes	56294132	32328324	6785084	82900224	72365248	83498812	75299372	8069249	6585101	75455216	73948342	72603064	(291.1536, 1094676.2)(292.1565, 167892.72)(293.1597, 58778.797)(273.14322, 96446.77)(274.1448, 19448.727)(293.16544, 56303.266)(294.1686, 6514.61)(275.15738, 125502.56)(276.1601, 21089.22)(333.32846, 7773.329)(334.4129, 5537.565)(334.12933, 3061.8726)(334.13263, 5309.9453)(335.1342, 8209.75)(336.1259, 187.83)(315.36505, 3036.5974)(317.45193, 2220.1501)(318.1243, 504.2)(315.2461, 3608.6016)(317.15…
Artemether	Terpenoids	Sesquiterpenes	651829	1130776	1085648	2125509	2937171	1597350	23928930	23747036	24895752	1316599	1350467	1877694	(299.29974, 5184.0967)(300.75336, 10066.593)(302.1889, 9622.494)(302.1955, 4524.78)(280.59222, 311112.28)(282.02417, 67979.22)(284.5151, 23889.252)(285.18317, 2153.015)(300.18372, 34505.52)(302.19925, 12012.964)(303.1946, 5228.87)(282.1758, 186111.44)(283.17685, 31963.0)(284.58487, 33807.48)(285.17825, 8961.863)(338.56012, 7071.6323)(340.13516, 4453.13)(341.8107, 6042.83)(320.0502, 12356.741)(322…
Arteannoide B	Terpenoids	Sesquiterpenes	6970025	1	4799276	5233567	4373893	4233569	22364064	22879494	226355372	59028748	58217976	55576244	(407.1844, 12207.635)(408.2921, 131333.22)(409.8951, 109273.64)(410.18375, 62351.414)(388.41415, 5001.5913)(390.17377, 2457.805)(392.1802, 3728.3901)(408.1958, 652.875)(390.04773, 9463.341)(391.98154, 6360.3306)(392.4316, 9279.18)(393.853, 10190.443)(394.1901, 13472.64)(445.54462, 11544.287)(446.14673, 4784.332)(427.13336, 84157.43)(428.1368, 17316.246)(429.13324, 2013.755)(429.36566, 6277.8667)(…
Arteannoide C	Terpenoids	Sesquiterpenes	6425848	5774378	5769517	1	3671295	3742726	1715642	1823368	1764984	5466895	5605956	4838357	(437.00784, 83167.66)(438.1927, 26975.22)(439.19678, 4805.666)(419.98306, 675.478)(419.1795, 541.11)(437.1988, 9380.975)(438.2018, 1401.57)(419.1794, 604.57)(475.1576, 2549.145)(457.1459, 16470.965)(458.1518, 3343.22)(459.1647, 446.16)(459.1687, 1417.68)(441.16724, 122715.68)(442.1702, 26537.754)(443.1606, 6460.81)
Arteannoide A	Terpenoids	Sesquiterpenes	762583	738550	720781	82635527	73153560	84256056	5206756	5596748	5998386	49040072	44660516	44817504	(497.2832, 47902.574)(498.2869, 15439.797)(499.28836, 5265.432)(500.292, 3012.6267)(479.06976, 5158.3916)(481.2823, 18770.63)(482.2961, 11923.75)(483.2967, 19571.9)(499.30032, 11053.942)(498.29355, 5093.91)(480.13358, 15023.655)(480.88437, 6077.1846)(535.64435, 61470.6)(536.801, 21195.764)(519.2335, 48993.387)(520.23706, 13277.095)(521.2401, 2929.2349)(523.2362, 5087.8896)(519.26624, 620523.25)(5…
Abscisic acid	Terpenoids	Sesquiterpenes	19284743	17592764	16273036	12852367	13837738	18969367	15534549	16651201	10676003	15956774	1	10041050	(265.1404, 173394.66)(266.14288, 34164.37)(268.65063, 2490.865)(269.1507, 2249.68)(246.23528, 11837.215)(248.1322, 17096.16)(247.12982, 171784.34)(248.13205, 30446.74)(303.35315, 11258.536)(304.85968, 2304.62)(309.114, 2362.77)(287.53815, 5802.4067)(287.1231, 117693.836)(288.12885, 22453.893)(270.34528, 8047.49)(271.12674, 11297.617)
Artemisic acid	Terpenoids	Triterpenes	13765132	13627362	13677857	1	1	1	1	25448938	1	1	1	1	(235.16615, 243099.8)(236.16931, 38627.96)(217.1542, 74978.34)(218.157, 12591.05)(217.15564, 53568.812)(218.1546, 12352.885)(276.12875, 93469.19)(276.12622, 18463.766)(279.14215, 38465.742)(255.45093, 792.61005)(257.1132, 3558.94)(257.14713, 2043.36)(239.14296, 1680.5267)(240.1594, 149.19)
Carnosic acid	Terpenoids	Triterpenes	1975192	1449048	659795	3047613	4579905	6444194	10340416	9622072	12836266	6858469	7869760	3434908	(332.53333, 28480.129)(333.2013, 14104.51)(334.20395, 3658.12)(314.91785, 7188.684)(315.18668, 2147.1199)(333.2124, 1118.2201)(316.5361, 8205.964)(371.3291, 67381.96)(372.38696, 17705.06)(375.1732, 3156.93)(353.69516, 19861.375)(354.65582, 9743.745)(356.77628, 83420.555)(358.975, 23931.732)(360.00027, 18496.938)(360.1993, 4837.49)(338.59842, 7568.3257)(339.1741, 203702.5)(342.1896, 1351.79)

## Sheet: Pearson's correlation
Correlation		Anthocyanins	Flavanols	Flavanones	Flavonols	Lignans	LMW_phenolics	Phenolic_acids	Stilbenes	Terpenoids
EC50_SH_MTT_Extract EC50	Pearson's correlation	-,577*	-,945**	-,875**	-0.424	-,894**	-,621*	-,949**	-,913**	-,728**
	Sign. (two-tailed)	0.05	0	0	0.17	0	0.031	0	0	0.007
	N	12	12	12	12	12	12	12	12	12
** Correlation is significant at the 0.01 level (two-tailed).
* Correlation is significant at the 0.05 level (two-tailed).

## Sheet: VIP markers
Primary ID	Class	Sub-class	VIP ± SD	Log FC EtOH [25%] vs [0%]	Regulation	Log FC EtOH [50%] vs [0%]	Regulation	Log FC EtOH [90%] vs [0%]	Regulation	p < 0.05
1,3-di-O-caffeoylquinic acid/4,5-di-O-caffeoylquinic acid	Phenolic acids	Hydroxycinnamic acids	1.18 ± 0.48	-19.9901	down	-19.8146	down	-20.5509	down	***
Peonidin 3-O-rutinoside	Flavonoids	Anthocyanins	1.30 ± 0.09	2.29953	up	-1.74882	down	2.21051	up
Pelargonidin 3-O-sambubioside	Flavonoids	Anthocyanins	1.27 ± 0.26	2.54621	up	2.40412	up	0.766809	up	***
Cyanidin 3-O-(6''-p-coumaroyl-glucoside)	Flavonoids	Anthocyanins	1.25 ± 0.32	-0.137239	down	0.564714	up	-1.24147	down	***
Delphinidin 3-O-glucosyl-glucoside / Delphinidin 3,5-O-diglucoside	Flavonoids	Anthocyanins	1.24 ± 0.22	-3.49922	down	-1.28724	down	-1.28835	down
Pelargonidin 3-O-glucosyl-rutinoside	Flavonoids	Anthocyanins	1.23 ± 0.30	5.93525	up	3.77542	up	3.68026	up	***
Delphinidin 3-O-(6''-acetyl-galactoside) / Delphinidin 3-O-(6''-acetyl-glucoside)	Flavonoids	Anthocyanins	1.19 ± 0.35	-18.7382	down	-18.5628	down	-8.18506	down
Malvidin 3-O-(6''-acetyl-galactoside)	Flavonoids	Anthocyanins	1.19 ± 0.42	-21.8636	down	-21.6881	down	-22.4244	down	***
Cyanidin 3-O-(6''-succinyl-glucoside)	Flavonoids	Anthocyanins	1.18 ± 0.62	18.108	up	11.5827	up	5.1017	up
Petunidin 3,5-O-diglucoside	Flavonoids	Anthocyanins	1.17 ± 0.25	0.0602941	up	2.99654	up	2.58137	up	***
Cyanidin 3-O-glucosyl-rutinoside	Flavonoids	Anthocyanins	1.17 ± 0.28	-0.456372	down	-0.295574	down	-3.56782	down	***
Pelargonidin 3-O-(6''-succinyl-glucoside)	Flavonoids	Anthocyanins	1.16 ± 0.26	-0.385047	down	0.286845	up	2.70258	up	***
Cyanidin 3-O-(6''-malonyl-3''-glucosyl-glucoside)	Flavonoids	Anthocyanins	1.16 ± 0.28	-0.571371	down	-0.211719	down	18.6084	up	***
Petunidin 3-O-glucoside	Flavonoids	Anthocyanins	1.15 ± 0.30	-7.95013	down	0.856914	up	2.62826	up	***
Cyanidin 3-O-(6''-malonyl-glucoside)	Flavonoids	Anthocyanins	1.15 ± 0.26	-0.791351	down	-0.00575511	down	0.658901	up
Malvidin 3-O-glucoside	Flavonoids	Anthocyanins	1.14 ± 0.30	-0.548166	down	0.406486	up	1.79141	up
Malvidin 3-O-galactoside	Flavonoids	Anthocyanins	1.14 ± 0.57	-0.0568759	down	-1.16425	down	0.352416	up	***
Delphinidin 3-O-glucoside	Flavonoids	Anthocyanins	1.14 ± 0.36	-0.62541	down	0.518766	up	2.4709	up
Petunidin 3-O-galactoside	Flavonoids	Anthocyanins	1.13 ± 0.75	-19.7587	down	-19.5832	down	-20.3194	down	***
Delphinidin 3-O-arabinoside / Delphinidin 3-O-xyloside	Flavonoids	Anthocyanins	1.13 ± 0.32	-7.38395	down	-7.46425	down	-0.366504	down
Peonidin	Flavonoids	Anthocyanins	1.12 ± 0.18	1.71783	up	2.66257	up	3.13138	up	***
Delphinidin 3-O-feruloyl-glucoside / Pelargonidin 3,5-O-diglucoside	Flavonoids	Anthocyanins	1.11 ± 0.26	18.8957	up	19.9147	up	19.4475	up	***
Dihydroquercetin 3-O-rhamnoside / Eriodictyol 7-O-glucoside	Flavonoids	Dihydroflavonols	1.15 ± 0.11	0.844327	up	0.895395	up	0.716899	up
Dihydroquercetin	Flavonoids	Dihydroflavonols	1.11 ± 0.24	-0.348651	down	-5.28181	down	3.04393	up
(-)-Epigallocatechin / (+)-Gallocatechin	Flavonoids	Flavanols	1.18 ± 0.49	13.4247	up	14.1731	up	12.862	up
Theaflavin 3,3'-O-digallate	Flavonoids	Flavanols	1.17 ± 0.27	-0.283437	down	-0.227237	down	-18.5817	down	***
Prodelphinidin dimer B3	Flavonoids	Flavanols	1.15 ± 0.12	-4.16473	down	-7.64978	down	-10.1504	down
(-)-Epicatechin 3-O-gallate / (+)-Catechin 3-O-gallate	Flavonoids	Flavanols	1.14 ± 0.36	-7.68731	down	-6.63855	down	0.87167	up
Narirutin 4'-O-glucoside	Flavonoids	Flavanones	1.17 ± 0.31	-0.411397	down	-0.226868	down	-3.37349	down	***
Didymin / Poncirin	Flavonoids	Flavanones	1.16 ± 0.84	-0.0320523	down	-12.9548	down	-0.676459	down
6-Geranylnaringenin	Flavonoids	Flavanones	1.16 ± 0.38	7.42461	up	5.94585	up	4.75578	up
Naringin 6'-malonate	Flavonoids	Flavanones	1.14 ± 0.44	-0.571371	down	17.4703	up	10.7049	up
Apigenin 7-O-diglucuronide	Flavonoids	Flavones	1.23 ± 0.32	-2.34559	down	-1.4266	down	-0.852808	down	***
Luteolin 6-C-glucoside / Luteolin 7-O-glucoside	Flavonoids	Flavones	1.21 ± 0.30	-1.7212	down	-1.51416	down	-0.709691	down	***
Cirsilineol / Eupatorin / Pebrellin	Flavonoids	Flavones	1.18 ± 0.37	1.702	up	0.397281	up	-6.69973	down
Luteolin 7-O-diglucuronide	Flavonoids	Flavones	1.18 ± 0.32	-0.73282	down	1.24358	up	0.764999	up	***
Apigenin 7-O-(6''-malonyl-apiosyl-glucoside)	Flavonoids	Flavones	1.17 ± 0.30	-2.677	down	-1.39542	down	-3.70065	down	***
chrysosplenol D / Arcapillin	Flavonoids	Flavones	1.17 ± 0.25	-5.44984	down	4.6142	up	3.75409	up
Luteolin 7-O-glucuronide / Kaempferol 3-O-glucuronide	Flavonoids	Flavones	1.16 ± 0.32	-0.776239	down	-1.13312	down	0.665131	up
Luteolin 7-O-malonyl-glucoside / 5,4'-Dihydroxy-3,3'-dimethoxy-6:7-methylenedioxyflavone 4'-O-glucuronide	Flavonoids	Flavones	1.13 ± 0.37	12.0304	up	12.8378	up	11.5014	up
Gardenin B	Flavonoids	Flavones	1.13 ± 0.13	16.6563	up	17.9519	up	17.6933	up
7,3',4'-Trihydroxyflavone / Baicalein	Flavonoids	Flavones	1.12 ± 0.24	0.582357	up	0.893046	up	1.57715	up
Hispidulin	Flavonoids	Flavones	1.12 ± 0.30	-6.17597	down	2.04266	up	2.51237	up
artemetin	Flavonoids	Flavones	1.12 ± 0.27	-5.33236	down	3.90714	up	2.83895	up
Diosmin / Neodiosmin	Flavonoids	Flavones	1.11 ± 0.68	0.11356	up	-1.0291	down	1.81981	up
Kaempferide	Flavonoids	Flavonols	1.27 ± 0.36	0.73201	up	0.459795	up	-2.2534	down	***
Myricetin 3-O-glucoside	Flavonoids	Flavonols	1.21 ± 0.46	1.13099	up	-6.32137	down	0.823786	up
Myricetin 3-O-arabinoside	Flavonoids	Flavonols	1.21 ± 0.62	0.443054	up	-0.462083	down	-2.05832	down
Kaempferol 3-O-glucosyl-rhamnosyl-glucoside / Quercetin 3-O-rhamnosyl-rhamnosyl-glucoside	Flavonoids	Flavonols	1.20 ± 0.19	1.08318	up	3.36414	up	1.88747	up	***
Kaempferol 3-O-(2''-rhamnosyl-6''-acetyl-galactoside) 7-O-rhamnoside	Flavonoids	Flavonols	1.20 ± 0.57	5.04117	up	17.9592	up	15.9624	up
Kaempferol 3-O-glucosyl-rhamnosyl-galactoside	Flavonoids	Flavonols	1.20 ± 0.29	-17.6992	down	-17.5237	down	-18.2599	down	***
3-Methoxynobiletin	Flavonoids	Flavonols	1.19 ± 0.51	-3.01113	down	-2.20757	down	-1.93478	down
Kaempferol 3-O-(2''-rhamnosyl-galactoside) 7-O-rhamnoside / Kaempferol 3-O-rhamnosyl-rhamnosyl-glucoside / Kaempferol 3-O-xylosyl-rutinoside	Flavonoids	Flavonols	1.19 ± 0.16	16.6911	up	19.1116	up	17.4458	up	***
Isorhamnetin / Rhamnetin	Flavonoids	Flavonols	1.17 ± 0.41	1.9575	up	2.68611	up	0.947009	up
5,3',4'-Trihydroxy-3-methoxy-6:7-methylenedioxyflavone 4'-O-glucuronide	Flavonoids	Flavonols	1.16 ± 1.00	0.587915	up	-0.45405	down	-0.2304	down
Quercetin 3-O-glucoside	Flavonoids	Flavonols	1.16 ± 0.31	-6.63497	down	-19.0081	down	2.2744	up
Isorhamnetin 3-O-glucoside / Isorhamnetin 7-O-rhamnoside	Flavonoids	Flavonols	1.15 ± 0.29	-1.45397	down	0.837052	up	2.74344	up	***
Myricetin 3-O-rhamnoside / Quercetin 3-O-galactoside / Quercetin 4'-O-glucoside	Flavonoids	Flavonols	1.14 ± 0.35	-0.517764	down	0.0724901	up	2.2744	up
Patuletin 3-O-(2''-feruloylglucosyl)(1-6)-[apiosyl(1-2)]-glucoside	Flavonoids	Flavonols	1.13 ± 0.43	-0.187416	down	0.203494	up	-1.4353	down
Isorhamnetin 3-O-glucoside 7-O-rhamnoside	Flavonoids	Flavonols	1.12 ± 0.33	2.52352	up	10.2719	up	10.2319	up
Jaceidin 4'-O-glucuronide	Flavonoids	Flavonols	1.11 ± 0.71	-1.58935	down	-0.155968	down	-0.59861	down
6,8-Dihydroxykaempferol / Myricetin	Flavonoids	Flavonols	1.10 ± 0.27	-0.116913	down	-0.0392335	down	0.0562204	up
Daidzin	Flavonoids	Isoflavonoids	1.18 ± 0.22	-0.758897	down	-1.76743	down	0.877171	up	***
Glycitin	Flavonoids	Isoflavonoids	1.17 ± 0.47	-1.82683	down	-2.13542	down	-1.18682	down
Biochanin A / Glycitein	Flavonoids	Isoflavonoids	1.15 ± 0.19	3.42643	up	3.08058	up	4.42143	up	***
6''-O-Malonylgenistin	Flavonoids	Isoflavonoids	1.14 ± 0.49	-8.33733	down	-2.61095	down	-14.7543	down
6''-O-Malonyldaidzin	Flavonoids	Isoflavonoids	1.11 ± 0.33	-1.04406	down	-1.46632	down	-15.3373	down
Conidendrin	Lignans	Lignans	1.33 ± 0.54	8.2314	up	0.164202	up	6.01868	up
Isolariciresinol	Lignans	Lignans	1.32 ± 0.21	0.0351169	up	-23.0888	down	-9.41632	down
Cyclolariciresinol / Lariciresinol	Lignans	Lignans	1.27 ± 0.37	0.0351168	up	-8.81787	down	-9.41632	down
Medioresinol / Trachelogenin	Lignans	Lignans	1.16 ± 0.33	-0.859284	down	-1.78337	down	-2.60725	down	***
Matairesinol / Pinoresinol	Lignans	Lignans	1.14 ± 0.81	1.02408	up	0.427017	up	-7.32854	down
Secoisolariciresinol	Lignans	Lignans	1.13 ± 0.37	-1.75751	down	-2.89097	down	-3.48824	down	***
Secoisolariciresinol-sesquilignan	Lignans	Lignans	1.13 ± 0.43	7.62286	up	7.25254	up	6.93332	up
5-Pentacosenylresorcinol	Other polyphenols	Alkylphenols	1.19 ± 0.26	-8.46136	down	-8.47731	down	-0.177594	down
4-Vinylphenol	Other polyphenols	Alkylphenols	1.15 ± 0.27	-1.50334	down	-2.13818	down	-2.73204	down	***
5-Pentacosylresorcinol	Other polyphenols	Alkylphenols	1.12 ± 0.16	-0.806339	down	-0.705804	down	-11.8691	down
4-Ethylphenol	Other polyphenols	Alkylphenols	1.12 ± 0.22	15.7154	up	16.3162	up	16.0716	up
5-Nonadecenylresorcinol	Other polyphenols	Alkylphenols	1.11 ± 0.79	-0.328129	down	-0.579919	down	-1.19229	down
Curcumin	Other polyphenols	Curcuminoids	1.12 ± 0.30	-0.365079	down	-0.235738	down	1.43682	up
2,3-Dihydroxy-1-guaiacylpropanone	Other polyphenols	Hydroxybenzoketones	1.21 ± 0.41	8.44418	up	7.04167	up	7.94494	up
Ferulaldehyde / Mellein	Other polyphenols	Hydroxycinnamaldehydes	1.12 ± 0.74	1.59364	up	-0.645784	down	0.530163	up
scopoletin	Other polyphenols	Hydroxycoumarins	1.30 ± 0.30	0.210674	up	0.0993875	up	-0.545496	down
4-Hydroxycoumarin / Umbelliferone	Other polyphenols	Hydroxycoumarins	1.13 ± 0.44	9.81017	up	8.59134	up	8.46666	up
2-Methoxy-5-prop-1-enylphenol / Eugenol	Other polyphenols	Hydroxyphenylpropenes	1.32 ± 0.66	0.18769	up	-7.51902	down	-1.17932	down
Acetyl eugenol	Other polyphenols	Hydroxyphenylpropenes	1.18 ± 0.44	3.52653	up	3.52978	up	-7.35914	down
Juglone	Other polyphenols	Naphtoquinones	1.20 ± 0.50	6.32791	up	-1.6888	down	-2.75703	down
Phlorin	Other polyphenols	Other polyphenols	1.18 ± 0.84	-1.45843	down	-0.104282	down	-2.1251	down
Phenol	Other polyphenols	Other polyphenols	1.18 ± 0.65	-4.12644	down	-2.46513	down	-9.35944	down
Pyrogallol	Other polyphenols	Other polyphenols	1.11 ± 0.29	6.46474	up	6.02643	up	7.62166	up
Oleoside dimethylester	Other polyphenols	Tyrosols	1.35 ± 0.46	7.06439	up	-7.75807	down	5.8456	up
Hydroxytyrosol	Other polyphenols	Tyrosols	1.26 ± 0.34	2.07637	up	3.35186	up	0.937067	up	***
Hydroxytyrosol 4-O-glucoside	Other polyphenols	Tyrosols	1.24 ± 0.46	15.6669	up	15.3247	up	14.6455	up
3,4-DHPEA-EA / Oleuropein-aglycone	Other polyphenols	Tyrosols	1.18 ± 0.36	-6.36544	down	1.43806	up	0.696575	up
p-HPEA-EDA	Other polyphenols	Tyrosols	1.16 ± 0.62	8.5044	up	7.01432	up	6.97862	up
Ligstroside	Other polyphenols	Tyrosols	1.13 ± 0.41	-0.967468	down	-7.79098	down	-0.191519	down
3-Hydroxybenzoic acid	Phenolic acids	Hydroxybenzoic acids	1.27 ± 0.71	-0.571371	down	19.8851	up	-1.13214	down	***
Ellagic acid glucoside	Phenolic acids	Hydroxybenzoic acids	1.24 ± 0.25	-0.507154	down	-17.4615	down	-0.2324	down	***
Gallic acid ethyl ester / Syringic acid	Phenolic acids	Hydroxybenzoic acids	1.20 ± 0.25	-12.8975	down	-4.19058	down	-6.07955	down
Gallic acid	Phenolic acids	Hydroxybenzoic acids	1.18 ± 0.22	-3.21292	down	-2.28944	down	-9.80294	down
5-O-Galloylquinic acid	Phenolic acids	Hydroxybenzoic acids	1.14 ± 0.37	-0.576223	down	0.0493215	up	-0.609084	down
Ellagic acid arabinoside	Phenolic acids	Hydroxybenzoic acids	1.12 ± 0.76	-3.52636	down	-20.7211	down	-1.99391	down	***
Valoneic acid dilactone	Phenolic acids	Hydroxybenzoic acids	1.12 ± 0.23	-1.63985	down	-1.89662	down	-19.1845	down	***
2,6-Dihydroxybenzoic acid / 3,5-Dihydroxybenzoic acid / Gentisic acid / Protocatechuic acid	Phenolic acids	Hydroxybenzoic acids	1.10 ± 0.22	-0.567115	down	0.363466	up	0.661877	up	***
Avenanthramide 2f	Phenolic acids	Hydroxycinnamic acids	1.35 ± 0.26	-0.571371	down	18.975	up	-1.13214	down	***
3,4-Diferuloylquinic acid / 3,5-Diferuloylquinic acid	Phenolic acids	Hydroxycinnamic acids	1.26 ± 0.26	-2.97449	down	-0.722689	down	-0.566183	down
p-Coumaroyl glucose	Phenolic acids	Hydroxycinnamic acids	1.22 ± 0.17	19.9293	up	-0.395908	down	5.86199	up
2,5-di-S-Glutathionyl caftaric acid	Phenolic acids	Hydroxycinnamic acids	1.21 ± 0.25	0.0360203	up	0.320007	up	-18.4287	down	***
Hydroxycaffeic acid	Phenolic acids	Hydroxycinnamic acids	1.19 ± 0.33	24.3936	up	25	up	14.6544	up
Ferulic acid 4-O-glucoside / Feruloyl glucose	Phenolic acids	Hydroxycinnamic acids	1.17 ± 0.19	3.32206	up	4.86588	up	3.95202	up	***
3-p-Coumaroylquinic acid / 4-p-Coumaroylquinic acid / 5-p-Coumaroylquinic acid / p-Coumaroylquinic acid	Phenolic acids	Hydroxycinnamic acids	1.17 ± 0.19	3.24866	up	4.79319	up	3.88457	up	***
1,2'-Disinapoyl-2-feruloylgentiobiose	Phenolic acids	Hydroxycinnamic acids	1.16 ± 0.26	-0.571371	down	-0.395908	down	15.6718	up	***
Avenanthramide 2c / Avenanthramide K	Phenolic acids	Hydroxycinnamic acids	1.16 ± 0.36	-2.93755	down	-8.94631	down	-9.61723	down
methyl-3,4-di-O-caffeoylquinic acid/methyl-3,5- di-O-caffeoylquinic acid	Phenolic acids	Hydroxycinnamic acids	1.14 ± 0.32	0.885279	up	8.02958	up	10.9968	up
5-8'-Dehydrodiferulic acid / 8-O-4'-Dehydrodiferulic acid	Phenolic acids	Hydroxycinnamic acids	1.13 ± 0.34	-0.00596237	down	1.56977	up	1.89368	up
Verbascoside	Phenolic acids	Hydroxycinnamic acids	1.13 ± 0.27	-1.61116	down	-2.42349	down	-3.38666	down
3-Caffeoylquinic acid / 4-Caffeoylquinic acid / 5-Caffeoylquinic acid	Phenolic acids	Hydroxycinnamic acids	1.13 ± 0.42	-8.04328	down	-6.48967	down	2.00097	up
24-Methylcholestanol ferulate	Phenolic acids	Hydroxycinnamic acids	1.12 ± 1.26	1.13943	up	-6.98962	down	-0.984824	down
24-Methylcholesterol ferulate / 24-Methylenecholestanol ferulate	Phenolic acids	Hydroxycinnamic acids	1.11 ± 0.25	-21.454	down	-21.2785	down	-15.0404	down
Caffeic acid 4-O-glucoside / Caffeoyl glucose	Phenolic acids	Hydroxycinnamic acids	1.11 ± 0.12	13.3332	up	14.1766	up	14.058	up
p-Coumaroyl malic acid	Phenolic acids	Hydroxycinnamic acids	1.11 ± 0.41	-1.51749	down	-3.12798	down	-2.3214	down
daucosterol	Phytosterols	Sitosterols	1.13 ± 0.27	-0.762845	down	-0.912251	down	-1.36864	down
beta-sitosterol	Phytosterols	Sitosterols	1.11 ± 0.53	-0.549778	down	-0.288736	down	-1.31181	down
Resveratrol 3-O-glucoside	Stilbenes	Stilbenes	1.18 ± 0.34	-20.2255	down	-20.0501	down	-20.7863	down	***
Piceatannol 3-O-glucoside	Stilbenes	Stilbenes	1.18 ± 0.32	3.05734	up	3.91052	up	2.83952	up	***
Resveratrol	Stilbenes	Stilbenes	1.16 ± 0.25	0.595085	up	1.87585	up	0.94654	up
Artemether	Terpenoids	Sesquiterpenes	1.34 ± 0.26	2.32179	up	10.9073	up	0.0609264	up	***
Dihydroartemisinin	Terpenoids	Sesquiterpenes	1.23 ± 0.27	6.13577	up	4.83797	up	3.96823	up
arteannoide Q/R	Terpenoids	Sesquiterpenes	1.20 ± 0.72	1.17511	up	8.2327	up	5.86707	up
arteannoide M	Terpenoids	Sesquiterpenes	1.20 ± 0.26	-11.3256	down	-3.75426	down	-3.90181	down
Abscisic acid methyl ester	Terpenoids	Sesquiterpenes	1.18 ± 0.22	-0.507201	down	-1.132	down	-2.42896	down	***
Artemisitene	Terpenoids	sesquiterpenes	1.17 ± 0.72	15.2536	up	14.8081	up	13.3729	up
arteannuin B	Terpenoids	Sesquiterpenes	1.13 ± 0.45	7.444	up	10.6829	up	9.7028	up
Arteannoide B	Terpenoids	Sesquiterpenes	1.11 ± 0.27	6.58402	up	0.915796	up	9.67144	up
Carnosic acid	Terpenoids	Triterpenes	1.17 ± 0.48	1.28657	up	2.73794	up	1.07363	up
